# Supplementary material for: RNA-Seq analysis of salinity stress–responsive transcriptome in the liver of spotted sea bass (Lateolabrax maculatus)
Source: PLoS One. 2017 Mar 2;12(3):e0173238. doi: 10.1371/journal.pone.0173238 (PMC5333887; doi:10.1371/journal.pone.0173238)
Supplement: S4 Appendix — (XLS) [file pone.0173238.s004.xls]

## Sheet: LS_LvsHS_L.DEGannot
gene_id	LS_L_readcount	HS_L_readcount	log2FoldChange	adj-pval	Gene Length	NR GI	NR ID	NR Score	NR Evalue	NR Description	NT GI	NT ID	NT Score	NT Evalue	NT Description	KO ID	KO Name	KO Description	Http Link	Swissprot ID	Swissprot Score	Swissprot Evalue	Swissprot Description	PFAM ID	PFAM description	Gene Ontology Biological Pathway	BP Description	Gene Ontology Molecular Function	MF Description	Gene Ontology Cellular Component	CC Description	KOG ID	KOG Description
c16976_g1	0.495054	2721.25	-12.424	2.2e-11	1011	348509200	XP_003442139.1	814	3.35e-105	PREDICTED: heme-binding protein 2-like [Oreochromis niloticus]	--	--	--	--	--	--	--	--	--	Q9Y5Z4	273	9.18e-27	Heme-binding protein 2 OS=Homo sapiens GN=HEBP2 PE=1 SV=1	PF12503//PF01642	Cucumber mosaic virus 1a protein C terminal//Methylmalonyl-CoA mutase	GO:0008152	metabolic process	GO:0031419//GO:0016817//GO:0016866//GO:0008168	cobalamin binding//hydrolase activity, acting on acid anhydrides//intramolecular transferase activity//methyltransferase activity	--	--	--	--
c101852_g1	0.495054	565.673	-10.158	1.01e-08	1338	499002597	XP_004555269.1	540	4.56e-62	PREDICTED: putative ferric-chelate reductase 1-like [Maylandia zebra]	--	--	--	--	--	--	--	--	--	A4QP81	129	1.31e-06	Putative ferric-chelate reductase 1 OS=Danio rerio GN=frrs1 PE=2 SV=1	--	--	--	--	--	--	--	--	--	--
c104063_g6	0.972585	200.345	-7.6864	1.6e-06	1250	554829658	XP_005925423.1	728	1.83e-90	PREDICTED: centriolar coiled-coil protein of 110 kDa-like [Haplochromis burtoni]	542249601	XM_005461039.1	288	2.3e-147	PREDICTED: Oreochromis niloticus centriolar coiled-coil protein of 110 kDa-like (LOC102080622), mRNA	K16453	CCP110, CEP110	centrosomal protein CEP110	http://www.genome.jp/dbget-bin/www_bget?ko:K16453	O43303	397	5.06e-40	Centriolar coiled-coil protein of 110 kDa OS=Homo sapiens GN=CCP110 PE=1 SV=3	PF00612	IQ calmodulin-binding motif	--	--	GO:0005515	protein binding	--	--	--	--
c95869_g1	105.079	0	Inf	2.27e-06	417	--	--	--	--	--	--	--	--	--	--	--	--	--	--	--	--	--	--	--	--	--	--	--	--	--	--	--	--
c89393_g1	3746.97	83.4041	5.4895	2.19e-05	904	55775525	AAV65043.1	581	2.03e-71	virus-induced protein 5 [Siniperca chuatsi]	55775524	AY647432.1	351	0	Siniperca chuatsi virus-induced protein 5 mRNA, complete cds	--	--	--	--	Q5QGU6	260	6.11e-24	Receptor-transporting protein 3 OS=Mus musculus GN=Rtp3 PE=2 SV=2	PF13237	4Fe-4S dicluster domain	--	--	GO:0051536	iron-sulfur cluster binding	--	--	--	--
c68517_g1	3.83777	236.985	-5.9484	2.33e-05	624	--	--	--	--	--	--	--	--	--	--	--	--	--	--	--	--	--	--	--	--	--	--	--	--	--	--	--	--
c11728_g1	8.15306	388.586	-5.5747	3.21e-05	2022	348530642	XP_003452819.1	892	2.06e-112	PREDICTED: claudin-15-like [Oreochromis niloticus]	229367015	BT082781.1	365	0	Anoplopoma fimbria clone afim-evh-005-333 Claudin-15 putative mRNA, complete cds	K06087	CLDN	claudin	http://www.genome.jp/dbget-bin/www_bget?ko:K06087	P56746	436	1.07e-47	Claudin-15 OS=Homo sapiens GN=CLDN15 PE=1 SV=1	PF13903//PF00822	PMP-22/EMP/MP20/Claudin tight junction//PMP-22/EMP/MP20/Claudin family	--	--	GO:0005198	structural molecule activity	GO:0005886//GO:0016021//GO:0005923	plasma membrane//integral component of membrane//tight junction	--	--
c91934_g1	6.20789	277.856	-5.4841	4.89e-05	2503	542181806	XP_005469025.1	1338	1.05e-168	PREDICTED: uncharacterized threonine-rich GPI-anchored glycoprotein PJ4664.02-like [Oreochromis niloticus]	--	--	--	--	--	--	--	--	--	E9Q7X6	232	3.4e-18	Protein HEG homolog 1 OS=Mus musculus GN=Heg1 PE=1 SV=1	--	--	--	--	--	--	--	--	--	--
c94978_g1	2.38765	138.214	-5.8552	5.14e-05	1933	657576118	XP_008291828.1	366	2.33e-35	PREDICTED: flocculation protein FLO11-like [Stegastes partitus]	--	--	--	--	--	--	--	--	--	--	--	--	--	--	--	--	--	--	--	--	--	--	--
c106780_g2	27.3945	1041.72	-5.2489	5.32e-05	7542	317419372	CBN81409.1	6816	0	Alpha-tectorin [Dicentrarchus labrax]	542192126	XM_005471236.1	1787	0	PREDICTED: Oreochromis niloticus IgGFc-binding protein-like (LOC100691880), mRNA	K18273	TECTA	alpha-tectorin	http://www.genome.jp/dbget-bin/www_bget?ko:K18273	O75443	1965	0	Alpha-tectorin OS=Homo sapiens GN=TECTA PE=1 SV=3	PF06119//PF01221	Nidogen-like//Dynein light chain type 1	GO:0007160//GO:0007017	cell-matrix adhesion//microtubule-based process	--	--	GO:0005875	microtubule associated complex	KOG1216	von Willebrand factor and related coagulation proteins
c97603_g1	0.47753	72.8412	-7.253	7.24e-05	1930	548356151	XP_005730211.1	1757	0	PREDICTED: beta-1,3-galactosyl-O-glycosyl-glycoprotein beta-1,6-N-acetylglucosaminyltransferase 3-like [Pundamilia nyererei]	548356150	XM_005730154.1	549	0	PREDICTED: Pundamilia nyererei beta-1,3-galactosyl-O-glycosyl-glycoprotein beta-1,6-N-acetylglucosaminyltransferase 3-like (LOC102204385), mRNA	K09662	GCNT3	N-acetylglucosaminyltransferase 3, mucin type	http://www.genome.jp/dbget-bin/www_bget?ko:K09662	Q80RC7	1289	1.72e-170	Beta-1,3-galactosyl-O-glycosyl-glycoprotein beta-1,6-N-acetylglucosaminyltransferase OS=Bovine herpesvirus 4 GN=Bo17 PE=1 SV=1	PF02485	Core-2/I-Branching enzyme	--	--	GO:0008375	acetylglucosaminyltransferase activity	GO:0016020	membrane	KOG0799	Branching enzyme
c96993_g1	2.40518	202.465	-6.3954	8.85e-05	2812	542242573	XP_005458449.1	2517	0	PREDICTED: sodium-coupled monocarboxylate transporter 1-like isoform X1 [Oreochromis niloticus] >gi|542242575|ref|XP_005458450.1| PREDICTED: sodium-coupled monocarboxylate transporter 1-like isoform X2 [Oreochromis niloticus]	542242574	XM_005458393.1	1055	0	PREDICTED: Oreochromis niloticus sodium-coupled monocarboxylate transporter 1-like (LOC100705258), transcript variant X2, mRNA	K14388	SLC5A8_12, SMCT	solute carrier family 5 (sodium-coupled monocarboxylate transporter), member 8/12	http://www.genome.jp/dbget-bin/www_bget?ko:K14388	Q3ZMH1	2045	0	Sodium-coupled monocarboxylate transporter 1 OS=Danio rerio GN=slc5a8 PE=1 SV=1	PF00474	Sodium:solute symporter family	GO:0055085//GO:0006810	transmembrane transport//transport	GO:0005215	transporter activity	GO:0016020	membrane	KOG2349	Na+:iodide/myo-inositol/multivitamin symporters
c99737_g1	2.86518	127.504	-5.4758	0.00010541	2784	657572634	XP_008289941.1	1818	0	PREDICTED: UDP-GlcNAc:betaGal beta-1,3-N-acetylglucosaminyltransferase 7 [Stegastes partitus]	554820500	XM_005920926.1	489	0	PREDICTED: Haplochromis burtoni UDP-GlcNAc:betaGal beta-1,3-N-acetylglucosaminyltransferase 7-like (LOC102313627), mRNA	K09664	B3GNT7	beta-1,3-N-acetylglucosaminyltransferase 7	http://www.genome.jp/dbget-bin/www_bget?ko:K09664	Q8K0J2	1203	1.5e-154	UDP-GlcNAc:betaGal beta-1,3-N-acetylglucosaminyltransferase 7 OS=Mus musculus GN=B3gnt7 PE=2 SV=2	PF01762//PF02434	Galactosyltransferase//Fringe-like	GO:0006486	protein glycosylation	GO:0016757//GO:0008378	transferase activity, transferring glycosyl groups//galactosyltransferase activity	GO:0016020	membrane	KOG2287	Galactosyltransferases
c154593_g1	3.34271	133.141	-5.3158	0.00013798	1008	551504279	XP_005803676.1	1474	0	PREDICTED: endonuclease domain-containing 1 protein-like [Xiphophorus maculatus]	551504278	XM_005803619.1	456	0	PREDICTED: Xiphophorus maculatus endonuclease domain-containing 1 protein-like (LOC102220798), mRNA	--	--	--	--	Q8C522	189	2.37e-14	Endonuclease domain-containing 1 protein OS=Mus musculus GN=Endod1 PE=1 SV=2	PF01223	DNA/RNA non-specific endonuclease	--	--	GO:0003676//GO:0046872//GO:0016787	nucleic acid binding//metal ion binding//hydrolase activity	--	--	--	--
c95974_g1	266.948	7.74737	5.1067	0.00014859	3007	348517208	XP_003446127.1	758	2.25e-88	PREDICTED: PI-PLC X domain-containing protein 3-like [Oreochromis niloticus]	542226047	XM_003446079.2	395	0	PREDICTED: Oreochromis niloticus PI-PLC X domain-containing protein 3-like (LOC100705757), mRNA	--	--	--	--	Q58EK3	711	2.82e-83	PI-PLC X domain-containing protein 3 OS=Danio rerio GN=plcxd3 PE=2 SV=1	PF03176	MMPL family	GO:0006629	lipid metabolic process	GO:0008081	phosphoric diester hydrolase activity	GO:0016020	membrane	--	--
c99160_g1	137.551	2.37068	5.8585	0.0001718	2705	657598229	XP_008303886.1	1628	0	PREDICTED: serine/threonine-protein kinase SBK2-like [Stegastes partitus]	542240342	XM_003452726.2	597	0	PREDICTED: Oreochromis niloticus serine/threonine-protein kinase SBK1-like (LOC100711058), mRNA	--	--	--	--	B1WBU5	492	4.28e-53	Serine/threonine-protein kinase SBK2 OS=Rattus norvegicus GN=Sbk2 PE=2 SV=1	PF00069//PF07714	Protein kinase domain//Protein tyrosine kinase	GO:0006468	protein phosphorylation	GO:0005524//GO:0004672	ATP binding//protein kinase activity	--	--	KOG1345	Serine/threonine kinase
c73254_g1	2.38765	100.023	-5.3886	0.00018373	961	--	--	--	--	--	--	--	--	--	--	--	--	--	--	--	--	--	--	PF07943	Penicillin-binding protein 5, C-terminal domain	GO:0006508	proteolysis	GO:0009002	serine-type D-Ala-D-Ala carboxypeptidase activity	--	--	--	--
c82399_g1	6.68542	209.249	-4.9681	0.0001847	2073	542192151	XP_005471300.1	769	1.79e-90	PREDICTED: mucin-13-like [Oreochromis niloticus]	--	--	--	--	--	--	--	--	--	Q9H3R2	220	2.32e-17	Mucin-13 OS=Homo sapiens GN=MUC13 PE=1 SV=3	PF07645//PF00008	Calcium-binding EGF domain//EGF-like domain	--	--	GO:0005515//GO:0005509	protein binding//calcium ion binding	--	--	--	--
c98361_g1	364.47	12.9817	4.8112	0.00019582	2171	348513364	XP_003444212.1	646	8.87e-105	PREDICTED: tyrosyl-DNA phosphodiesterase 2-like isoform X1 [Oreochromis niloticus] >gi|542211453|ref|XP_005478563.1| PREDICTED: tyrosyl-DNA phosphodiesterase 2-like isoform X2 [Oreochromis niloticus]	--	--	--	--	--	--	--	--	--	Q5XJA0	521	9.76e-84	Tyrosyl-DNA phosphodiesterase 2 OS=Danio rerio GN=tdp2 PE=1 SV=3	PF05197	TRIC channel	GO:0015672//GO:0006812	monovalent inorganic cation transport//cation transport	GO:0005261	cation channel activity	GO:0016020	membrane	KOG2756	Predicted Mg2+-dependent phosphodiesterase TTRAP
c96235_g1	10.5407	291.26	-4.7883	0.00021947	1982	657595038	XP_008302161.1	934	3.83e-118	PREDICTED: kallikrein-1-like [Stegastes partitus]	432873595	XM_004072247.1	127	1.16e-57	PREDICTED: Oryzias latipes kallikrein-2-like (LOC101170099), mRNA	--	--	--	--	P00760	225	5.68e-19	Cationic trypsin OS=Bos taurus PE=1 SV=3	PF00089	Trypsin	GO:0006508	proteolysis	GO:0004252	serine-type endopeptidase activity	--	--	--	--
c77716_g1	5.32293	280.602	-5.7202	0.00022056	1298	657577588	XP_008292630.1	432	5.25e-48	PREDICTED: transcobalamin-1-like [Stegastes partitus]	--	--	--	--	--	--	--	--	--	--	--	--	--	--	--	--	--	--	--	--	--	--	--
c2666_g1	0.495054	45.9954	-6.5378	0.00023358	917	--	--	--	--	--	554852035	XM_005936194.1	226	4.88e-113	PREDICTED: Haplochromis burtoni transcription factor Sox-8-like (LOC102293014), mRNA	--	--	--	--	--	--	--	--	--	--	--	--	--	--	--	--	--	--
c4762_g1	7.21553	326.711	-5.5008	0.0002661	942	--	--	--	--	--	542204798	XR_270010.1	67	1.22e-24	PREDICTED: Oreochromis niloticus uncharacterized LOC100705284 (LOC100705284), misc_RNA	--	--	--	--	--	--	--	--	--	--	--	--	--	--	--	--	--	--
c93468_g1	0	30.3918	#NAME?	0.0002748	330	--	--	--	--	--	--	--	--	--	--	--	--	--	--	--	--	--	--	--	--	--	--	--	--	--	--	--	--
c90832_g1	6.80809	187.017	-4.7798	0.00027882	2479	401709407	AFP97547.1	1125	1.92e-143	intestinal mucin, partial [Sparus aurata]	401709406	JQ277712.1	487	0	Sparus aurata intestinal mucin mRNA, partial cds	--	--	--	--	Q9H195	160	9.88e-10	Mucin-3B (Fragments) OS=Homo sapiens GN=MUC3B PE=2 SV=2	--	--	--	--	--	--	--	--	--	--
c14328_g1	35317.7	1473.25	4.5833	0.00029881	691	542233795	XP_005455118.1	570	5.12e-71	PREDICTED: mid1-interacting protein 1-B-like [Oreochromis niloticus]	157965710	EU144047.1	385	0	Perca flavescens vertebrate MID1 interacting-like protein mRNA, complete cds	--	--	--	--	Q1LUV9	197	2.02e-17	Mid1-interacting protein 1-B OS=Danio rerio GN=mid1ip1b PE=2 SV=1	--	--	--	--	--	--	--	--	--	--
c94629_g1	2.4227	77.772	-5.0046	0.00045461	4324	542204198	XP_005475839.1	3306	0	PREDICTED: myelin regulatory factor-like protein-like [Oreochromis niloticus]	542204197	XM_005475782.1	1060	0	PREDICTED: Oreochromis niloticus myelin regulatory factor-like protein-like (LOC100700651), mRNA	--	--	--	--	Q3UN70	1598	0	Myelin regulatory factor-like protein OS=Mus musculus GN=Myrfl PE=2 SV=1	PF05224	NDT80 / PhoG like DNA-binding family	--	--	GO:0003677	DNA binding	--	--	KOG3661	Uncharacterized conserved protein
c17395_g1	23.9291	510.071	-4.4139	0.00045835	552	642108375	CDQ72516.1	336	4.33e-37	unnamed protein product [Oncorhynchus mykiss]	554838189	XM_005929489.1	78	5.37e-31	PREDICTED: Haplochromis burtoni protein S100-A1-like (LOC102293680), mRNA	--	--	--	--	Q7LZT1	333	3.36e-38	Protein S100-A1 OS=Misgurnus fossilis GN=s100a1 PE=1 SV=1	PF13499//PF00036//PF13405	EF-hand domain pair//EF hand//EF-hand domain	--	--	GO:0005509	calcium ion binding	--	--	--	--
c85846_g1	17.5591	366.462	-4.3834	0.00046514	2264	658875628	XP_008420812.1	510	4.72e-53	PREDICTED: mucin-19-like [Poecilia reticulata]	--	--	--	--	--	--	--	--	--	Q6INU7	145	4.5e-08	Putative ferric-chelate reductase 1 OS=Xenopus laevis GN=frrs1 PE=2 SV=1	--	--	--	--	--	--	--	--	--	--
c82122_g1	0.95506	48.1243	-5.655	0.00048716	2060	657543700	XP_008277417.1	1832	0	PREDICTED: G-protein coupled receptor 64-like isoform X2 [Stegastes partitus]	554877584	XM_005948581.1	494	0	PREDICTED: Haplochromis burtoni G-protein coupled receptor 64-like (LOC102294946), mRNA	--	--	--	--	C6KFA3	580	1.29e-61	G-protein coupled receptor 126 OS=Danio rerio GN=gpr126 PE=2 SV=1	PF00002//PF01825	7 transmembrane receptor (Secretin family)//Latrophilin/CL-1-like GPS domain	GO:0007218//GO:0007186	neuropeptide signaling pathway//G-protein coupled receptor signaling pathway	GO:0004930	G-protein coupled receptor activity	GO:0016020//GO:0016021	membrane//integral component of membrane	KOG4193	G protein-coupled receptors
c97905_g2	0.95506	46.5219	-5.6062	0.00051271	909	657595459	XP_008302391.1	358	1.84e-34	PREDICTED: aminopeptidase N-like [Stegastes partitus]	--	--	--	--	--	K11140	ANPEP	aminopeptidase N	http://www.genome.jp/dbget-bin/www_bget?ko:K11140	P79098	241	7.08e-21	Aminopeptidase N OS=Bos taurus GN=ANPEP PE=2 SV=4	--	--	--	--	--	--	--	--	--	--
c155226_g1	0	25.1763	#NAME?	0.00059785	410	--	--	--	--	--	--	--	--	--	--	--	--	--	--	--	--	--	--	--	--	--	--	--	--	--	--	--	--
c100583_g2	906.664	44.3364	4.354	0.00060355	5434	542170115	XP_005466998.1	2809	0	PREDICTED: myosin-binding protein C, cardiac-type-like isoform X2 [Oreochromis niloticus]	542170130	XM_005466943.1	1051	0	PREDICTED: Oreochromis niloticus myosin-binding protein C, cardiac-type-like (LOC100690737), transcript variant X4, mRNA	K12568	MYBPC3	myosin-binding protein C, cardiac-type	http://www.genome.jp/dbget-bin/www_bget?ko:K12568	Q90688	2142	0	Myosin-binding protein C, cardiac-type OS=Gallus gallus GN=MYBPC3 PE=1 SV=3	PF01239//PF01688//PF00041	Protein prenyltransferase alpha subunit repeat//Alphaherpesvirus glycoprotein I//Fibronectin type III domain	GO:0018342	protein prenylation	GO:0008318//GO:0005515	protein prenyltransferase activity//protein binding	GO:0043657	host cell	KOG0613	Projectin/twitchin and related proteins
c82198_g1	0	23.6639	#NAME?	0.00071254	1569	499048821	XP_004574951.1	340	1.65e-33	PREDICTED: CMP-N-acetylneuraminate-beta-galactosamide-alpha-2,3-sialyltransferase 1-like [Maylandia zebra]	542256219	XM_005463620.1	98	1.21e-41	PREDICTED: Oreochromis niloticus CMP-N-acetylneuraminate-beta-galactosamide-alpha-2,3-sialyltransferase 1-like (LOC100693206), mRNA	K00780	SIAT4A	beta-galactoside alpha-2,3-sialyltransferase (sialyltransferase 4A)	http://www.genome.jp/dbget-bin/www_bget?ko:K00780	Q11200	235	4.6e-20	CMP-N-acetylneuraminate-beta-galactosamide-alpha-2,3-sialyltransferase 1 OS=Gallus gallus GN=ST3GAL1 PE=2 SV=1	PF00777	Glycosyltransferase family 29 (sialyltransferase)	GO:0006486	protein glycosylation	GO:0008373	sialyltransferase activity	--	--	--	--
c122670_g1	23.8897	0	Inf	0.00079408	1201	--	--	--	--	--	--	--	--	--	--	--	--	--	--	--	--	--	--	--	--	--	--	--	--	--	--	--	--
c107184_g1	0	23.1992	#NAME?	0.00082557	949	554885848	XP_005952528.1	148	1.06e-07	PREDICTED: stonustoxin subunit beta-like [Haplochromis burtoni]	--	--	--	--	--	--	--	--	--	--	--	--	--	--	--	--	--	--	--	--	--	--	--
c94658_g1	263.518	4409.38	-4.0646	0.00083507	2758	499026334	XP_004563910.1	1355	2.54e-176	PREDICTED: malate dehydrogenase-like [Maylandia zebra]	542223250	XM_005451075.1	476	0	PREDICTED: Oreochromis niloticus uncharacterized LOC100712095 (LOC100712095), mRNA	K05884	comC	L-2-hydroxycarboxylate dehydrogenase (NAD+)	http://www.genome.jp/dbget-bin/www_bget?ko:K05884	O59028	565	4.32e-63	Malate dehydrogenase OS=Pyrococcus horikoshii (strain ATCC 700860 / DSM 12428 / JCM 9974 / NBRC 100139 / OT-3) GN=mdh PE=1 SV=1	PF02615	Malate/L-lactate dehydrogenase	GO:0055114//GO:0008152	oxidation-reduction process//metabolic process	GO:0016491	oxidoreductase activity	--	--	--	--
c95233_g1	72.8037	1257.22	-4.1101	0.00084	1245	432871312	XP_004071904.1	840	5.4e-107	PREDICTED: deoxyribonuclease-1-like [Oryzias latipes]	57157232	AB097844.1	296	8.16e-152	Pagrus major DNASE1 mRNA for deoxyribonuclease I, complete cds	K11994	DNASE1	deoxyribonuclease-1	http://www.genome.jp/dbget-bin/www_bget?ko:K11994	O42446	831	3.37e-107	Deoxyribonuclease-1 OS=Oreochromis mossambicus GN=dnase1 PE=1 SV=2	--	--	--	--	--	--	--	--	--	--
c185136_g1	0	21.9903	#NAME?	0.00086146	269	--	--	--	--	--	--	--	--	--	--	--	--	--	--	--	--	--	--	--	--	--	--	--	--	--	--	--	--
c34916_g1	1.91012	56.8011	-4.8942	0.00086947	2892	1163139	AAB16821.1	2204	0	Na/Pi cotransport system protein [Pseudopleuronectes americanus] >gi|1763236|gb|AAB39696.1| Na/Pi cotransporter [Pseudopleuronectes americanus]	1163138	U13963.1	959	0	Pseudopleuronectes americanus Na/Pi cotransport system protein mRNA, complete cds	K14683	SLC34A, NPT, nptA	solute carrier family 34 (sodium-dependent phosphate cotransporter)	http://www.genome.jp/dbget-bin/www_bget?ko:K14683	Q9JJ09	1702	0	Sodium-dependent phosphate transport protein 2B OS=Rattus norvegicus GN=Slc34a2 PE=2 SV=1	PF02690//PF01252	Na+/Pi-cotransporter//Signal peptidase (SPase) II	GO:0006817//GO:0044341//GO:0006508	phosphate ion transport//sodium-dependent phosphate transport//proteolysis	GO:0004190//GO:0015321	aspartic-type endopeptidase activity//sodium-dependent phosphate transmembrane transporter activity	GO:0016020	membrane	--	--
c102028_g2	5.88808	118.818	-4.3348	0.00091474	4780	410925783	XP_003976359.1	4613	0	PREDICTED: heat-stable enterotoxin receptor-like [Takifugu rubripes]	410925782	XM_003976310.1	1456	0	PREDICTED: Takifugu rubripes heat-stable enterotoxin receptor-like (LOC101074666), mRNA	K12320	GUCY2C	heat-stable enterotoxin receptor	http://www.genome.jp/dbget-bin/www_bget?ko:K12320	P55204	2979	0	Heat-stable enterotoxin receptor OS=Sus scrofa GN=GUCY2C PE=2 SV=2	PF07714//PF00211//PF00069	Protein tyrosine kinase//Adenylate and Guanylate cyclase catalytic domain//Protein kinase domain	GO:0009190//GO:0035556//GO:0006468	cyclic nucleotide biosynthetic process//intracellular signal transduction//protein phosphorylation	GO:0016849//GO:0004672//GO:0005524	phosphorus-oxygen lyase activity//protein kinase activity//ATP binding	--	--	KOG1023	Natriuretic peptide receptor, guanylate cyclase
c72951_g1	0	21.9191	#NAME?	0.00092377	1310	542246197	XP_005459791.1	1587	0	PREDICTED: uncharacterized protein LOC102079668 [Oreochromis niloticus]	542246196	XM_005459734.1	557	0	PREDICTED: Oreochromis niloticus uncharacterized LOC102079668 (LOC102079668), mRNA	--	--	--	--	--	--	--	--	--	--	--	--	--	--	--	--	--	--
c44230_g1	68.9177	1130.09	-4.0354	0.00092517	1877	229367830	ACQ58895.1	600	6.77e-71	Beta-galactoside-binding lectin [Anoplopoma fimbria] >gi|229367948|gb|ACQ58954.1| Beta-galactoside-binding lectin [Anoplopoma fimbria]	229367947	BT083247.1	291	7.48e-149	Anoplopoma fimbria clone afim-evh-535-197 Beta-galactoside-binding lectin putative mRNA, complete cds	K06830	LGALS1	galectin-1	http://www.genome.jp/dbget-bin/www_bget?ko:K06830	P08520	304	1.11e-30	Beta-galactoside-binding lectin OS=Electrophorus electricus PE=1 SV=1	PF00337	Galactoside-binding lectin	--	--	GO:0030246	carbohydrate binding	--	--	KOG3587	Galectin, galactose-binding lectin
c74633_g1	0	21.7674	#NAME?	0.00099484	1433	657531377	XP_008301190.1	1527	0	PREDICTED: inward rectifier potassium channel 16-like [Stegastes partitus]	410902517	XM_003964692.1	415	0	PREDICTED: Takifugu rubripes inward rectifier potassium channel 16-like (LOC101066782), mRNA	K05009	KCNJ16	potassium inwardly-rectifying channel subfamily J member 16	http://www.genome.jp/dbget-bin/www_bget?ko:K05009	Q9NPI9	819	1.18e-102	Inward rectifier potassium channel 16 OS=Homo sapiens GN=KCNJ16 PE=2 SV=1	PF01007	Inward rectifier potassium channel	GO:0006813	potassium ion transport	GO:0005242	inward rectifier potassium channel activity	GO:0016021//GO:0008076	integral component of membrane//voltage-gated potassium channel complex	KOG3827	Inward rectifier K+ channel
c104025_g1	3.36024	80.2609	-4.5781	0.00099614	2844	--	--	--	--	--	--	--	--	--	--	--	--	--	--	--	--	--	--	PF03194	LUC7 N_terminus	GO:0006376	mRNA splice site selection	GO:0003729	mRNA binding	GO:0005685	U1 snRNP	--	--
c59274_g1	5241.05	103.74	5.6588	0.0009971	2223	583969797	XP_006780343.1	1128	4.39e-145	PREDICTED: haptoglobin-like [Neolamprologus brichardi]	359691072	FN565172.1	418	0	Oreochromis mossambicus mRNA for haptoglobin (hp gene)	--	--	--	--	O35086	341	2.68e-33	Haptoglobin OS=Mesocricetus auratus GN=HP PE=2 SV=1	PF02558//PF00089	Ketopantoate reductase PanE/ApbA//Trypsin	GO:0006508//GO:0015940//GO:0055114	proteolysis//pantothenate biosynthetic process//oxidation-reduction process	GO:0004252//GO:0008677	serine-type endopeptidase activity//2-dehydropantoate 2-reductase activity	--	--	KOG3627	Trypsin
c63379_g1	22.3519	0	Inf	0.0010062	369	--	--	--	--	--	--	--	--	--	--	--	--	--	--	--	--	--	--	--	--	--	--	--	--	--	--	--	--
c68350_g1	0.47753	30.956	-6.0185	0.0010575	733	--	--	--	--	--	542229178	XM_005453309.1	159	6.79e-76	PREDICTED: Oreochromis niloticus cdc42 effector protein 3-like (LOC102081895), transcript variant X3, mRNA	--	--	--	--	--	--	--	--	--	--	--	--	--	--	--	--	--	--
c44209_g1	5.25283	110.197	-4.3909	0.0010825	763	657525042	XP_008279157.1	704	3.15e-90	PREDICTED: anterior gradient protein 2 homolog [Stegastes partitus]	229365831	BT082189.1	318	2.9e-164	Anoplopoma fimbria clone afim-evh-530-293 Anterior gradient protein 2 homolog precursor putative mRNA, complete cds	--	--	--	--	Q5RZ65	625	4.15e-80	Anterior gradient protein 2 homolog OS=Danio rerio GN=agr2 PE=2 SV=1	--	--	--	--	--	--	--	--	--	--
c99077_g1	0.972585	37.2621	-5.2597	0.0011541	4621	542241827	XP_005458181.1	4468	0	PREDICTED: unconventional myosin-VIIa-like [Oreochromis niloticus]	542241826	XM_005458124.1	1144	0	PREDICTED: Oreochromis niloticus unconventional myosin-VIIa-like (LOC100697976), mRNA	K10359	MYO7	myosin VII	http://www.genome.jp/dbget-bin/www_bget?ko:K10359	Q6PIF6	2804	0	Unconventional myosin-VIIb OS=Homo sapiens GN=MYO7B PE=2 SV=2	PF00612//PF00640//PF00784	IQ calmodulin-binding motif//Phosphotyrosine interaction domain (PTB/PID)//MyTH4 domain	--	--	GO:0005515	protein binding	GO:0005856	cytoskeleton	KOG4229	Myosin VII, myosin IXB and related myosins
c99721_g1	1.94517	51.9174	-4.7383	0.0012982	1852	348533141	XP_003454064.1	1183	3.55e-155	PREDICTED: glycerophosphodiester phosphodiesterase domain-containing protein 3-like isoform X1 [Oreochromis niloticus]	542177740	XM_003454016.2	450	0	PREDICTED: Oreochromis niloticus glycerophosphodiester phosphodiesterase domain-containing protein 3-like (LOC100705708), transcript variant X1, mRNA	--	--	--	--	Q7L5L3	691	2.46e-83	Glycerophosphodiester phosphodiesterase domain-containing protein 3 OS=Homo sapiens GN=GDPD3 PE=2 SV=3	PF03009	Glycerophosphoryl diester phosphodiesterase family	GO:0006629//GO:0006071//GO:0009395//GO:0046486	lipid metabolic process//glycerol metabolic process//phospholipid catabolic process//glycerolipid metabolic process	GO:0008889	glycerophosphodiester phosphodiesterase activity	--	--	--	--
c104221_g1	2.90023	64.7808	-4.4813	0.0013006	1784	554877847	XP_005948769.1	844	5.62e-128	PREDICTED: inosine-uridine preferring nucleoside hydrolase-like [Haplochromis burtoni]	56251696	CR676803.2	318	6.95e-164	Tetraodon nigroviridis full-length cDNA	--	--	--	--	Q27546	247	5.05e-33	Inosine-uridine preferring nucleoside hydrolase OS=Crithidia fasciculata GN=IUNH PE=1 SV=3	--	--	--	--	--	--	--	--	KOG2938	Predicted inosine-uridine preferring nucleoside hydrolase
c61290_g1	29.2126	0.474136	5.9451	0.0014242	1870	584013907	XP_006801742.1	2774	0	PREDICTED: ryanodine receptor 2-like [Neolamprologus brichardi]	499039626	XM_004570390.1	1069	0	PREDICTED: Maylandia zebra ryanodine receptor 2-like (LOC101474189), mRNA	K04962	RYR2	ryanodine receptor 2	http://www.genome.jp/dbget-bin/www_bget?ko:K04962	B0LPN4	2066	0	Ryanodine receptor 2 OS=Rattus norvegicus GN=Ryr2 PE=1 SV=2	PF06459	Ryanodine Receptor TM 4-6	GO:0006816//GO:0006874	calcium ion transport//cellular calcium ion homeostasis	GO:0005219	ryanodine-sensitive calcium-release channel activity	GO:0005622//GO:0016021	intracellular//integral component of membrane	--	--
c81353_g1	7.28562	160.864	-4.4646	0.0015169	2022	657527264	XP_008286932.1	1408	0	PREDICTED: aquaporin-3-like [Stegastes partitus]	109639281	DQ647191.1	863	0	Dicentrarchus labrax aquaporin 3 (AQP3) mRNA, complete cds	K09876	AQP3	aquaporin-3	http://www.genome.jp/dbget-bin/www_bget?ko:K09876	Q8R2N1	973	6.39e-125	Aquaporin-3 OS=Mus musculus GN=Aqp3 PE=2 SV=1	PF00230//PF01736	Major intrinsic protein//Polyomavirus agnoprotein	GO:0006810	transport	GO:0003677//GO:0005215	DNA binding//transporter activity	GO:0016020	membrane	KOG0224	Aquaporin (major intrinsic protein family)
c101702_g1	9.63822	277.586	-4.848	0.0016858	2403	554836688	XP_005928825.1	673	7.47e-79	PREDICTED: papilin-like [Haplochromis burtoni]	520993614	KC415780.1	40	3.26e-09	Sebastiscus marmoratus clone Sm3-31 microsatellite sequence	--	--	--	--	W4VSH9	211	2.14e-17	Kunitz-type serine protease inhibitor Kunitz-1 OS=Trittame loki PE=2 SV=2	PF00014//PF11837	Kunitz/Bovine pancreatic trypsin inhibitor domain//Domain of unknown function (DUF3357)	GO:0005985//GO:0006012//GO:0005982	sucrose metabolic process//galactose metabolic process//starch metabolic process	GO:0004867//GO:0004564//GO:0004575	serine-type endopeptidase inhibitor activity//beta-fructofuranosidase activity//sucrose alpha-glucosidase activity	GO:0017177	glucosidase II complex	KOG4295	Serine proteinase inhibitor (KU family)
c65303_g1	1.91012	47.7214	-4.6429	0.0017477	372	432847411	XP_004066011.1	272	1.02e-25	PREDICTED: protein disulfide-isomerase A2-like [Oryzias latipes]	--	--	--	--	--	K09581	PDIA2	protein disulfide isomerase family A, member 2	http://www.genome.jp/dbget-bin/www_bget?ko:K09581	Q5RCH2	201	1.52e-17	Protein disulfide-isomerase A2 OS=Pongo abelii GN=PDIA2 PE=2 SV=1	PF04147//PF00085//PF06524//PF09026//PF02724	Nop14-like family//Thioredoxin//NOA36 protein//Centromere protein B dimerisation domain//CDC45-like protein	GO:0045454//GO:0006270//GO:0006355	cell redox homeostasis//DNA replication initiation//regulation of transcription, DNA-templated	GO:0003682//GO:0003677//GO:0008270	chromatin binding//DNA binding//zinc ion binding	GO:0000775//GO:0032040//GO:0005634//GO:0000785	chromosome, centromeric region//small-subunit processome//nucleus//chromatin	KOG0190	Protein disulfide isomerase (prolyl 4-hydroxylase beta subunit)
c99494_g1	1.92764	46.6831	-4.598	0.0018234	4479	542173027	XP_005467495.1	3036	0	PREDICTED: probable G-protein coupled receptor 112-like isoform X1 [Oreochromis niloticus] >gi|542173031|ref|XP_005467496.1| PREDICTED: probable G-protein coupled receptor 112-like isoform X2 [Oreochromis niloticus] >gi|542173035|ref|XP_005467497.1| PREDICTED: probable G-protein coupled receptor 112-like isoform X3 [Oreochromis niloticus]	542173038	XM_005467441.1	849	0	PREDICTED: Oreochromis niloticus probable G-protein coupled receptor 112-like (LOC100696980), transcript variant X4, mRNA	K08455	GPR112	G protein-coupled receptor 112	http://www.genome.jp/dbget-bin/www_bget?ko:K08455	Q8IZF6	1314	1.07e-148	Probable G-protein coupled receptor 112 OS=Homo sapiens GN=GPR112 PE=2 SV=2	PF01825//PF08007//PF00002//PF00487	Latrophilin/CL-1-like GPS domain//Cupin superfamily protein//7 transmembrane receptor (Secretin family)//Fatty acid desaturase	GO:0006629//GO:0007218//GO:0007186	lipid metabolic process//neuropeptide signaling pathway//G-protein coupled receptor signaling pathway	GO:0005515//GO:0004930	protein binding//G-protein coupled receptor activity	GO:0016020//GO:0016021	membrane//integral component of membrane	KOG4193	G protein-coupled receptors
c104378_g4	1.92764	45.7159	-4.5678	0.0018371	1738	548417700	XP_005742074.1	409	2.96e-43	PREDICTED: leucine-rich repeat-containing protein 19-like [Pundamilia nyererei]	--	--	--	--	--	--	--	--	--	--	--	--	--	PF04147	Nop14-like family	--	--	--	--	GO:0032040	small-subunit processome	--	--
c136987_g1	0.47753	25.7928	-5.7552	0.0018416	663	--	--	--	--	--	--	--	--	--	--	--	--	--	--	--	--	--	--	--	--	--	--	--	--	--	--	--	--
c100317_g1	5.87056	101.17	-4.1071	0.0018505	3576	657524897	XP_008278681.1	1112	9.23e-138	PREDICTED: circadian-associated transcriptional repressor [Stegastes partitus]	542239407	XM_003452479.2	406	0	PREDICTED: Oreochromis niloticus uncharacterized LOC100706575 (LOC100706575), mRNA	--	--	--	--	Q3TQ03	325	1.79e-30	Circadian-associated transcriptional repressor OS=Mus musculus GN=Ciart PE=1 SV=1	PF08063	PADR1 (NUC008) domain	--	--	GO:0003950	NAD+ ADP-ribosyltransferase activity	GO:0005634	nucleus	--	--
c76270_g1	7.65801	175.098	-4.515	0.0019028	335	--	--	--	--	--	--	--	--	--	--	--	--	--	--	--	--	--	--	--	--	--	--	--	--	--	--	--	--
c95508_g1	0.95506	33.0043	-5.1109	0.0019312	1447	--	--	--	--	--	--	--	--	--	--	--	--	--	--	--	--	--	--	--	--	--	--	--	--	--	--	--	--
c86283_g1	0.47753	26.1246	-5.7737	0.0019374	1071	--	--	--	--	--	--	--	--	--	--	--	--	--	--	--	--	--	--	--	--	--	--	--	--	--	--	--	--
c154463_g1	11.0883	178.866	-4.0118	0.0019393	1270	657762418	XP_008316053.1	1365	0	PREDICTED: keratin, type I cytoskeletal 13-like isoform X2 [Cynoglossus semilaevis]	229366513	BT082530.1	605	0	Anoplopoma fimbria clone afim-evh-520-206 Keratin, type I cytoskeletal 13 putative mRNA, complete cds	K07604	KRT1	type I keratin, acidic	http://www.genome.jp/dbget-bin/www_bget?ko:K07604	Q8JFQ6	1323	3.68e-178	Keratin, type I cytoskeletal 13 OS=Oncorhynchus mykiss GN=krt13 PE=2 SV=1	PF00038//PF04977//PF07926//PF10186//PF04513//PF01576	Intermediate filament protein//Septum formation initiator//TPR/MLP1/MLP2-like protein//UV radiation resistance protein and autophagy-related subunit 14//Baculovirus polyhedron envelope protein, PEP, C terminus//Myosin tail	GO:0010508//GO:0007049//GO:0006606	positive regulation of autophagy//cell cycle//protein import into nucleus	GO:0005198//GO:0003774	structural molecule activity//motor activity	GO:0005882//GO:0019028//GO:0016459//GO:0005643//GO:0019031	intermediate filament//viral capsid//myosin complex//nuclear pore//viral envelope	KOG0977	Nuclear envelope protein lamin, intermediate filament superfamily
c54020_g1	0	139.865	#NAME?	0.0020298	1283	253762215	ACT35559.1	1816	0	pepsinogen A2 precursor [Siniperca scherzeri]	193499292	EU807927.1	841	0	Siniperca scherzeri pepsinogen A2 precursor, mRNA, complete cds	K06002	PGA	pepsin A	http://www.genome.jp/dbget-bin/www_bget?ko:K06002	Q9GMY8	1103	2.19e-146	Pepsin A OS=Sorex unguiculatus GN=PGA PE=2 SV=1	PF00026//PF07966//PF01179	Eukaryotic aspartyl protease//A1 Propeptide//Copper amine oxidase, enzyme domain	GO:0006508//GO:0009308//GO:0055114	proteolysis//amine metabolic process//oxidation-reduction process	GO:0008131//GO:0004190//GO:0005507//GO:0048038	primary amine oxidase activity//aspartic-type endopeptidase activity//copper ion binding//quinone binding	--	--	KOG1339	Aspartyl protease
c98033_g1	1.43259	37.6462	-4.7158	0.0020899	1262	617491154	XP_007578345.1	1800	0	PREDICTED: gelsolin [Poecilia formosa]	554875912	XM_005947778.1	607	0	PREDICTED: Haplochromis burtoni gelsolin-like (LOC102291935), transcript variant X8, mRNA	K05768	GSN	gelsolin	http://www.genome.jp/dbget-bin/www_bget?ko:K05768	O93510	1487	0	Gelsolin OS=Gallus gallus GN=GSN PE=2 SV=1	--	--	--	--	--	--	--	--	KOG0444	Cytoskeletal regulator Flightless-I (contains leucine-rich and gelsolin repeats)
c33931_g1	783.045	59.916	3.7081	0.0021098	366	--	--	--	--	--	374722808	JQ514278.1	110	5.62e-49	Osmerus mordax LUC7La-like protein gene, partial cds; EPS8L1a-like protein gene, complete cds; LRRC18-like gene, LRRC18-like protein gene, complete cds; ARHGAP22-like protein gene, complete cds; MAPK8-like protein gene, complete cds; FRMPD2-like protein, type II antifreeze protein, GDF10-like protein, GDF2-like protein, RBP3-like protein-1, RBP3-like protein-2, ANTXR1a-like protein, UBTD1-like pr…	--	--	--	--	--	--	--	--	--	--	--	--	--	--	--	--	--	--
c91639_g1	0	17.7325	#NAME?	0.0021333	731	--	--	--	--	--	--	--	--	--	--	--	--	--	--	--	--	--	--	--	--	--	--	--	--	--	--	--	--
c77239_g2	22.7243	305.854	-3.7505	0.0021573	1054	657739847	XP_008336089.1	247	1.67e-22	PREDICTED: PDZK1-interacting protein 1 [Cynoglossus semilaevis]	--	--	--	--	--	--	--	--	--	--	--	--	--	--	--	--	--	--	--	--	--	--	--
c7498_g1	17.4189	0	Inf	0.0024387	1113	--	--	--	--	--	--	--	--	--	--	--	--	--	--	--	--	--	--	--	--	--	--	--	--	--	--	--	--
c186794_g1	908.863	76.5149	3.5702	0.0024421	2053	657544353	XP_008277650.1	855	1.63e-105	PREDICTED: interleukin-20 receptor subunit alpha-like [Stegastes partitus]	551493344	XM_005798184.1	57	9.85e-19	PREDICTED: Xiphophorus maculatus interleukin-22 receptor subunit alpha-1-like (LOC102219036), mRNA	--	--	--	--	Q61190	167	3.86e-11	Interleukin-10 receptor subunit beta OS=Mus musculus GN=Il10rb PE=1 SV=1	PF00041	Fibronectin type III domain	--	--	GO:0005515	protein binding	--	--	--	--
c102038_g1	18.6938	248.013	-3.7298	0.0027501	1337	548349418	XP_005727055.1	376	1.34e-38	PREDICTED: fibroblast growth factor-binding protein 1-like [Pundamilia nyererei]	--	--	--	--	--	--	--	--	--	--	--	--	--	--	--	--	--	--	--	--	--	--	--
c96600_g1	159.311	11.7111	3.7659	0.0027907	2231	583990978	XP_006790678.1	1091	1.54e-138	PREDICTED: nuclear factor interleukin-3-regulated protein-like [Neolamprologus brichardi]	112420948	BT027764.1	359	0	Gasterosteus aculeatus clone CNB13-E01 mRNA sequence	--	--	--	--	--	--	--	--	PF07716//PF00170	Basic region leucine zipper//bZIP transcription factor	GO:0006355	regulation of transcription, DNA-templated	GO:0043565//GO:0003700	sequence-specific DNA binding//sequence-specific DNA binding transcription factor activity	GO:0005667	transcription factor complex	KOG3119	Basic region leucine zipper transcription factor
c90433_g3	22.0672	0	Inf	0.0030095	935	642018146	CDQ95621.1	131	2.7e-11	unnamed protein product [Oncorhynchus mykiss]	--	--	--	--	--	--	--	--	--	--	--	--	--	PF05920	Homeobox KN domain	GO:0006355	regulation of transcription, DNA-templated	GO:0003677	DNA binding	--	--	--	--
c99087_g1	1.92764	40.9223	-4.408	0.0030957	3316	498937429	XP_004541413.1	583	6.57e-60	PREDICTED: epithelial splicing regulatory protein 1-like isoform X1 [Maylandia zebra]	542196138	XM_005472732.1	629	0	PREDICTED: Oreochromis niloticus epithelial splicing regulatory protein 1 (esrp1), transcript variant X4, mRNA	K14947	ESRP1_2	epithelial splicing regulatory protein 1/2	http://www.genome.jp/dbget-bin/www_bget?ko:K14947	Q6DEZ7	257	3.64e-21	Epithelial splicing regulatory protein 1 OS=Xenopus tropicalis GN=esrp1 PE=2 SV=1	--	--	--	--	--	--	--	--	--	--
c106386_g1	2.40518	45.4218	-4.2392	0.0032627	5968	657542933	XP_008277150.1	5120	0	PREDICTED: phosphatidylinositol 4-phosphate 3-kinase C2 domain-containing subunit gamma [Stegastes partitus]	542222809	XM_005450902.1	1391	0	PREDICTED: Oreochromis niloticus phosphatidylinositol 4-phosphate 3-kinase C2 domain-containing subunit gamma-like (LOC100701633), mRNA	K00923	PIK3C2	phosphatidylinositol-4-phosphate 3-kinase	http://www.genome.jp/dbget-bin/www_bget?ko:K00923	O70167	2001	0	Phosphatidylinositol 4-phosphate 3-kinase C2 domain-containing subunit gamma OS=Mus musculus GN=Pik3c2g PE=2 SV=1	PF00787//PF00168//PF00454	PX domain//C2 domain//Phosphatidylinositol 3- and 4-kinase	--	--	GO:0016773//GO:0005515//GO:0035091	phosphotransferase activity, alcohol group as acceptor//protein binding//phosphatidylinositol binding	--	--	KOG0905	Phosphoinositide 3-kinase
c123523_g2	0	15.5942	#NAME?	0.0033189	596	--	--	--	--	--	542258763	XM_005464600.1	180	1.16e-87	PREDICTED: Oreochromis niloticus rap1 GTPase-activating protein 2-like (LOC100709214), transcript variant X8, mRNA	--	--	--	--	--	--	--	--	--	--	--	--	--	--	--	--	--	--
c69992_g1	0.972585	27.6088	-4.8272	0.0033467	3078	658896399	XP_008431050.1	2569	0	PREDICTED: sodium- and chloride-dependent transporter XTRP3 isoform X2 [Poecilia reticulata]	548539669	XM_005752869.1	1029	0	PREDICTED: Pundamilia nyererei sodium- and chloride-dependent transporter XTRP3A-like (LOC102216213), mRNA	K05048	SLC6A15S	solute carrier family 6 (neurotransmitter transporter, amino acid/orphan) member 15/16/17/18/20	http://www.genome.jp/dbget-bin/www_bget?ko:K05048	Q9NP91	1787	0	Sodium- and chloride-dependent transporter XTRP3 OS=Homo sapiens GN=SLC6A20 PE=1 SV=1	PF04517//PF00209	Microvirus lysis protein (E), C terminus//Sodium:neurotransmitter symporter family	GO:0006836//GO:0019054//GO:0006812	neurotransmitter transport//modulation by virus of host process//cation transport	GO:0004857//GO:0005328	enzyme inhibitor activity//neurotransmitter:sodium symporter activity	GO:0016021	integral component of membrane	KOG3659	Sodium-neurotransmitter symporter
c88784_g1	22.8995	0.554729	5.3674	0.0033718	1254	--	--	--	--	--	374428415	FQ310507.3	139	1.55e-64	Dicentrarchus labrax chromosome sequence corresponding to linkage group 1, bottom part, complete sequence	--	--	--	--	--	--	--	--	--	--	--	--	--	--	--	--	--	--
c96024_g1	0.95506	32.1083	-5.0712	0.0034079	2353	657560897	XP_008284140.1	1623	0	PREDICTED: ATP-sensitive inward rectifier potassium channel 15 [Stegastes partitus]	542236634	XM_005456157.1	642	0	PREDICTED: Oreochromis niloticus ATP-sensitive inward rectifier potassium channel 15-like (LOC100694083), mRNA	K05008	KCNJ15	potassium inwardly-rectifying channel subfamily J member 15	http://www.genome.jp/dbget-bin/www_bget?ko:K05008	Q91ZF1	1162	4.37e-150	ATP-sensitive inward rectifier potassium channel 15 OS=Rattus norvegicus GN=Kcnj15 PE=2 SV=1	PF00520//PF01007	Ion transport protein//Inward rectifier potassium channel	GO:0055085//GO:0006813//GO:0006811	transmembrane transport//potassium ion transport//ion transport	GO:0005242//GO:0005216	inward rectifier potassium channel activity//ion channel activity	GO:0016021//GO:0016020//GO:0008076	integral component of membrane//membrane//voltage-gated potassium channel complex	KOG3827	Inward rectifier K+ channel
c104114_g1	1.96269	38.1203	-4.2797	0.0034402	4608	657571934	XP_008289559.1	5844	0	PREDICTED: MAM and LDL-receptor class A domain-containing protein 1 [Stegastes partitus]	542218208	XM_005449124.1	2012	0	PREDICTED: Oreochromis niloticus MAM and LDL-receptor class A domain-containing protein C10orf112-like (LOC100693497), mRNA	--	--	--	--	Q5VYJ5	2805	0	MAM and LDL-receptor class A domain-containing protein 1 OS=Homo sapiens GN=MALRD1 PE=4 SV=3	PF00629//PF00057//PF00498	MAM domain//Low-density lipoprotein receptor domain class A//FHA domain	--	--	GO:0005515	protein binding	GO:0016020	membrane	KOG1095	Protein tyrosine kinase
c68097_g1	15.4737	0	Inf	0.0036679	2263	317419639	CBN81676.1	3307	0	Long-chain-fatty-acid--CoA ligase 5 [Dicentrarchus labrax]	542230429	XM_003448674.2	1192	0	PREDICTED: Oreochromis niloticus long-chain-fatty-acid--CoA ligase 5-like (LOC100709982), transcript variant X1, mRNA	K01897	ACSL, fadD	long-chain acyl-CoA synthetase	http://www.genome.jp/dbget-bin/www_bget?ko:K01897	Q9ULC5	2470	0	Long-chain-fatty-acid--CoA ligase 5 OS=Homo sapiens GN=ACSL5 PE=1 SV=1	PF00501	AMP-binding enzyme	GO:0008152	metabolic process	GO:0003824	catalytic activity	--	--	KOG1256	Long-chain acyl-CoA synthetases (AMP-forming)
c103887_g1	50.8022	3.16719	4.0036	0.0039783	1811	657556057	XP_008282358.1	595	3.87e-75	PREDICTED: obscurin-like protein 1 [Stegastes partitus]	554854352	XM_005937308.1	197	1.3e-96	PREDICTED: Haplochromis burtoni obscurin-like (LOC102301969), mRNA	--	--	--	--	D3ZZ80	273	1.88e-27	Obscurin-like protein 1 OS=Rattus norvegicus GN=Obsl1 PE=2 SV=3	PF00041//PF02155	Fibronectin type III domain//Glucocorticoid receptor	GO:0007165//GO:0042921//GO:0006355//GO:0043402	signal transduction//glucocorticoid receptor signaling pathway//regulation of transcription, DNA-templated//glucocorticoid mediated signaling pathway	GO:0004883//GO:0005496//GO:0003677//GO:0005515	glucocorticoid receptor activity//steroid binding//DNA binding//protein binding	GO:0005634	nucleus	--	--
c44264_g1	0	76.5348	#NAME?	0.0039873	1355	156740001	ABU93585.1	2089	0	gastric chitinase [Morone saxatilis]	156740000	EU048546.1	1147	0	Morone saxatilis gastric chitinase mRNA, complete cds	K01183	E3.2.1.14	chitinase	http://www.genome.jp/dbget-bin/www_bget?ko:K01183	Q9BZP6	1469	0	Acidic mammalian chitinase OS=Homo sapiens GN=CHIA PE=1 SV=1	PF00704//PF04847	Glycosyl hydrolases family 18//Calcipressin	GO:0019722//GO:0005975	calcium-mediated signaling//carbohydrate metabolic process	GO:0004553	hydrolase activity, hydrolyzing O-glycosyl compounds	--	--	KOG2806	Chitinase
c96755_g2	0.47753	20.5679	-5.4287	0.0040032	536	657556630	XP_008282605.1	605	2.01e-75	PREDICTED: phytanoyl-CoA dioxygenase domain-containing protein 1-like [Stegastes partitus]	542175389	XM_003445946.2	189	1.03e-92	PREDICTED: Oreochromis niloticus phytanoyl-CoA dioxygenase domain-containing protein 1-like (LOC100691362), mRNA	--	--	--	--	--	--	--	--	--	--	--	--	--	--	--	--	--	--
c97332_g1	3.82024	60.8977	-3.9947	0.0040917	1150	657582338	XP_008295223.1	1698	0	PREDICTED: protein disulfide-isomerase-like [Stegastes partitus]	551522427	XM_005812646.1	341	7.26e-177	PREDICTED: Xiphophorus maculatus protein disulfide-isomerase A2-like (LOC102222555), mRNA	K09580	PDIA1, P4HB	protein disulfide-isomerase A1	http://www.genome.jp/dbget-bin/www_bget?ko:K09580	P07237	1010	2.29e-131	Protein disulfide-isomerase OS=Homo sapiens GN=P4HB PE=1 SV=3	PF08534//PF00085	Redoxin//Thioredoxin	GO:0045454	cell redox homeostasis	GO:0016491	oxidoreductase activity	--	--	KOG0190	Protein disulfide isomerase (prolyl 4-hydroxylase beta subunit)
c74045_g1	55.5863	584.118	-3.3935	0.0042275	2339	317418884	CBN80922.1	1832	0	Type II keratin E3 [Dicentrarchus labrax]	48476436	AY550955.1	892	0	Sparus aurata type II keratin E3-like protein mRNA, complete cds	K07605	KRT2	type II keratin, basic	http://www.genome.jp/dbget-bin/www_bget?ko:K07605	P18520	1523	0	Intermediate filament protein ON3 OS=Carassius auratus PE=2 SV=1	PF00784//PF07926//PF04977//PF10473//PF01576//PF08702//PF08912//PF00038//PF02996	MyTH4 domain//TPR/MLP1/MLP2-like protein//Septum formation initiator//Leucine-rich repeats of kinetochore protein Cenp-F/LEK1//Myosin tail//Fibrinogen alpha/beta chain family//Rho Binding//Intermediate filament protein//Prefoldin subunit	GO:0006606//GO:0030168//GO:0007165//GO:0006457//GO:0051258//GO:0007049	protein import into nucleus//platelet activation//signal transduction//protein folding//protein polymerization//cell cycle	GO:0005102//GO:0005198//GO:0017048//GO:0008134//GO:0042803//GO:0051082//GO:0045502//GO:0030674//GO:0003774	receptor binding//structural molecule activity//Rho GTPase binding//transcription factor binding//protein homodimerization activity//unfolded protein binding//dynein binding//protein binding, bridging//motor activity	GO:0030286//GO:0005667//GO:0005856//GO:0005577//GO:0005643//GO:0016272//GO:0005882//GO:0016459	dynein complex//transcription factor complex//cytoskeleton//fibrinogen complex//nuclear pore//prefoldin complex//intermediate filament//myosin complex	KOG0977	Nuclear envelope protein lamin, intermediate filament superfamily
c104951_g4	0.47753	20.6579	-5.435	0.0042761	586	597753651	XP_007238651.1	187	3.94e-13	PREDICTED: LOW QUALITY PROTEIN: cadherin-23 [Astyanax mexicanus]	--	--	--	--	--	--	--	--	--	--	--	--	--	--	--	--	--	--	--	--	--	--	--
c105620_g1	7.25057	216.82	-4.9023	0.0042932	2666	657585293	XP_008296838.1	1430	0	PREDICTED: LOW QUALITY PROTEIN: uncharacterized protein LOC103369803 [Stegastes partitus]	499044763	XM_004572920.1	481	0	PREDICTED: Maylandia zebra uncharacterized LOC101486971 (LOC101486971), mRNA	--	--	--	--	Q9C000	146	5.26e-08	NACHT, LRR and PYD domains-containing protein 1 OS=Homo sapiens GN=NLRP1 PE=1 SV=1	PF00619	Caspase recruitment domain	GO:0042981	regulation of apoptotic process	GO:0005515	protein binding	GO:0005622	intracellular	--	--
c1493_g1	0.47753	19.7714	-5.3717	0.0044015	1765	542258082	XP_003459087.2	1750	0	PREDICTED: acidic mammalian chitinase-like [Oreochromis niloticus]	554859391	XM_005939766.1	671	0	PREDICTED: Haplochromis burtoni acidic mammalian chitinase-like (LOC102295520), mRNA	--	--	--	--	Q6RY07	998	4.64e-127	Acidic mammalian chitinase OS=Rattus norvegicus GN=Chia PE=2 SV=1	PF00704//PF01607//PF01213	Glycosyl hydrolases family 18//Chitin binding Peritrophin-A domain//Adenylate cyclase associated (CAP) N terminal	GO:0007010//GO:0006030//GO:0005975	cytoskeleton organization//chitin metabolic process//carbohydrate metabolic process	GO:0003779//GO:0008061//GO:0004553	actin binding//chitin binding//hydrolase activity, hydrolyzing O-glycosyl compounds	GO:0005576	extracellular region	KOG2806	Chitinase
c96685_g1	5278.96	528.954	3.319	0.0045073	2055	401664024	BAM36393.1	1110	6.24e-144	VHSV-induced protein [Oplegnathus fasciatus]	401664023	AB665352.1	537	0	Oplegnathus fasciatus mRNA for VHSV-induced protein, complete cds, clone: RB2085_E05	--	--	--	--	--	--	--	--	PF09162	Tap, RNA-binding	GO:0006406	mRNA export from nucleus	GO:0003723	RNA binding	GO:0005737//GO:0005634	cytoplasm//nucleus	--	--
c99386_g1	5.3054	70.5699	-3.7335	0.0045222	2870	583997851	XP_006794016.1	3558	0	PREDICTED: transient receptor potential cation channel subfamily M member 5-like [Neolamprologus brichardi]	542235512	XM_005455729.1	1650	0	PREDICTED: Oreochromis niloticus transient receptor potential cation channel, subfamily M, member 5 (trpm5), mRNA	K04980	TRPM5	transient receptor potential cation channel subfamily M member 5	http://www.genome.jp/dbget-bin/www_bget?ko:K04980	Q9JJH7	2354	0	Transient receptor potential cation channel subfamily M member 5 OS=Mus musculus GN=Trpm5 PE=1 SV=1	PF00520	Ion transport protein	GO:0006811//GO:0055085	ion transport//transmembrane transport	GO:0005216	ion channel activity	GO:0016020	membrane	KOG3614	Ca2+/Mg2+-permeable cation channels (LTRPC family)
c104189_g1	17.949	198.524	-3.4673	0.0045265	3586	410903081	XP_003965022.1	641	4.66e-65	PREDICTED: myosin-11 [Takifugu rubripes]	542182559	XM_005469090.1	393	0	PREDICTED: Oreochromis niloticus myosin-11-like (LOC100701079), transcript variant X5, mRNA	K10352	MYH	myosin heavy chain	http://www.genome.jp/dbget-bin/www_bget?ko:K10352	P10587	455	3.24e-44	Myosin-11 OS=Gallus gallus GN=MYH11 PE=1 SV=4	PF01576//PF00769//PF04111//PF01496//PF06009//PF00038//PF13851	Myosin tail//Ezrin/radixin/moesin family//Autophagy protein Apg6//V-type ATPase 116kDa subunit family//Laminin Domain II//Intermediate filament protein//Growth-arrest specific micro-tubule binding	GO:0007155//GO:0006914//GO:0048870//GO:0015992//GO:0015991	cell adhesion//autophagy//cell motility//proton transport//ATP hydrolysis coupled proton transport	GO:0005198//GO:0015078//GO:0003774//GO:0008092	structural molecule activity//hydrogen ion transmembrane transporter activity//motor activity//cytoskeletal protein binding	GO:0019898//GO:0005604//GO:0005882//GO:0033179//GO:0005737//GO:0016459//GO:0031514	extrinsic component of membrane//basement membrane//intermediate filament//proton-transporting V-type ATPase, V0 domain//cytoplasm//myosin complex//motile cilium	KOG0161	Myosin class II heavy chain
c101477_g1	54.2325	3.80251	3.8341	0.0045326	878	--	--	--	--	--	--	--	--	--	--	--	--	--	--	--	--	--	--	--	--	--	--	--	--	--	--	--	--
c101847_g1	114.301	1144.14	-3.3234	0.0045597	1250	657523890	XP_008275122.1	1325	2.76e-180	PREDICTED: heme oxygenase-like [Stegastes partitus]	119394686	EF139130.1	702	0	Dicentrarchus labrax heme oxygenase 1 mRNA, complete cds	K00510	HMOX, hmuO, ho	heme oxygenase	http://www.genome.jp/dbget-bin/www_bget?ko:K00510	O73688	1140	7.26e-154	Heme oxygenase OS=Takifugu rubripes GN=hmox PE=3 SV=1	PF01126	Heme oxygenase	GO:0055114//GO:0015994//GO:0006788	oxidation-reduction process//chlorophyll metabolic process//heme oxidation	GO:0004392	heme oxygenase (decyclizing) activity	--	--	KOG4480	Heme oxygenase
c94692_g2	11.0358	127.916	-3.5349	0.0045931	2529	657563895	XP_008285238.1	1746	0	PREDICTED: transmembrane protease serine 13-like [Stegastes partitus]	498951040	XM_004543688.1	453	0	PREDICTED: Maylandia zebra transmembrane protease serine 13-like (LOC101476381), mRNA	K09643	TMPRSS13, TMPRSS11	transmembrane protease, serine 13	http://www.genome.jp/dbget-bin/www_bget?ko:K09643	Q9BYE2	908	2.42e-109	Transmembrane protease serine 13 OS=Homo sapiens GN=TMPRSS13 PE=2 SV=4	PF00057//PF00530//PF00089	Low-density lipoprotein receptor domain class A//Scavenger receptor cysteine-rich domain//Trypsin	GO:0007165//GO:0006508	signal transduction//proteolysis	GO:0005515//GO:0004252//GO:0005044	protein binding//serine-type endopeptidase activity//scavenger receptor activity	GO:0016020	membrane	KOG3627	Trypsin
c97291_g1	2.38765	40.1069	-4.0702	0.0047301	963	657557844	XP_008283047.1	1324	1.5e-174	PREDICTED: integrin beta-6 isoform X2 [Stegastes partitus]	542169472	XM_005466835.1	537	0	PREDICTED: Oreochromis niloticus integrin beta-6-like (LOC100695654), transcript variant X2, mRNA	K06589	ITGB6	integrin beta 6	http://www.genome.jp/dbget-bin/www_bget?ko:K06589	P18564	841	5.49e-104	Integrin beta-6 OS=Homo sapiens GN=ITGB6 PE=1 SV=2	--	--	--	--	--	--	--	--	KOG1226	Integrin beta subunit (N-terminal portion of extracellular region)
c92708_g1	0.47753	19.7002	-5.3665	0.0047311	2549	--	--	--	--	--	--	--	--	--	--	--	--	--	--	--	--	--	--	PF05892	Trichovirus coat protein	--	--	--	--	GO:0019028	viral capsid	--	--
c30509_g1	1643.12	160.518	3.3556	0.0048178	675	--	--	--	--	--	--	--	--	--	--	--	--	--	--	--	--	--	--	--	--	--	--	--	--	--	--	--	--
c100222_g1	3.85529	55.2364	-3.8407	0.0048969	2131	--	--	--	--	--	542251216	XM_005461649.1	102	9.87e-44	PREDICTED: Oreochromis niloticus ADAMTS-like protein 5-like (LOC102081252), mRNA	--	--	--	--	--	--	--	--	--	--	--	--	--	--	--	--	--	--
c98760_g1	1521.39	152.656	3.317	0.0049421	4610	551491158	XP_005797151.1	1015	1.05e-119	PREDICTED: nuclear receptor ROR-beta-like [Xiphophorus maculatus]	542205193	XM_005476143.1	591	0	PREDICTED: Oreochromis niloticus nuclear receptor ROR-beta-like (LOC100699176), transcript variant X3, mRNA	K08533	NR1F2, RORB	RAR-related orphan receptor beta	http://www.genome.jp/dbget-bin/www_bget?ko:K08533	Q92753	486	2.82e-50	Nuclear receptor ROR-beta OS=Homo sapiens GN=RORB PE=1 SV=3	PF00104//PF00105	Ligand-binding domain of nuclear hormone receptor//Zinc finger, C4 type (two domains)	GO:0007165//GO:0006355//GO:0043401	signal transduction//regulation of transcription, DNA-templated//steroid hormone mediated signaling pathway	GO:0008270//GO:0003707//GO:0043565//GO:0003700	zinc ion binding//steroid hormone receptor activity//sequence-specific DNA binding//sequence-specific DNA binding transcription factor activity	GO:0005634//GO:0005667	nucleus//transcription factor complex	KOG4216	Steroid hormone nuclear receptor
c25026_g1	0	13.3658	#NAME?	0.0049561	2157	160552287	ABX44849.1	1731	0	pepsinogen C [Epinephelus coioides] >gi|160552289|gb|ABX44850.1| pepsinogen C [Epinephelus coioides]	193499296	EU807929.1	858	0	Siniperca chuatsi pepsinogen C precursor, mRNA, complete cds	K01377	PGC	gastricsin	http://www.genome.jp/dbget-bin/www_bget?ko:K01377	Q9GMY3	1151	1.61e-149	Gastricsin OS=Rhinolophus ferrumequinum GN=PGC PE=2 SV=1	PF00026//PF07966	Eukaryotic aspartyl protease//A1 Propeptide	GO:0006508	proteolysis	GO:0004190	aspartic-type endopeptidase activity	--	--	KOG1339	Aspartyl protease
c101490_g3	5.3054	67.7062	-3.6738	0.0049944	5603	657587279	XP_008297923.1	3930	0	PREDICTED: beta-1,4-N-acetylgalactosaminyltransferase 3 [Stegastes partitus]	542190449	XM_005470807.1	650	0	PREDICTED: Oreochromis niloticus beta-1,4-N-acetylgalactosaminyltransferase 3-like (LOC100709042), mRNA	K09656	B4GALNT3	beta-1,4-N-acetylgalactosaminyltransferase 3	http://www.genome.jp/dbget-bin/www_bget?ko:K09656	Q6L8S8	1218	4.01e-142	Beta-1,4-N-acetylgalactosaminyltransferase 3 OS=Mus musculus GN=B4galnt3 PE=2 SV=1	PF05679//PF00031//PF02950//PF02668	Chondroitin N-acetylgalactosaminyltransferase//Cystatin domain//Conotoxin//Taurine catabolism dioxygenase TauD, TfdA family	GO:0006810//GO:0009405//GO:0055114	transport//pathogenesis//oxidation-reduction process	GO:0016758//GO:0016491//GO:0008200//GO:0004869	transferase activity, transferring hexosyl groups//oxidoreductase activity//ion channel inhibitor activity//cysteine-type endopeptidase inhibitor activity	GO:0005576//GO:0032580	extracellular region//Golgi cisterna membrane	KOG3588	Chondroitin synthase 1
c38626_g1	14.0937	0	Inf	0.0050848	681	--	--	--	--	--	--	--	--	--	--	--	--	--	--	--	--	--	--	--	--	--	--	--	--	--	--	--	--
c73554_g1	14.0587	0	Inf	0.0050974	457	--	--	--	--	--	--	--	--	--	--	--	--	--	--	--	--	--	--	--	--	--	--	--	--	--	--	--	--
c84787_g1	335.489	31.8854	3.3953	0.0051225	677	348513173	XP_003444117.1	611	9.05e-77	PREDICTED: receptor-transporting protein 3-like [Oreochromis niloticus]	306922099	AB490949.1	346	6.97e-180	Sebastes schlegelii mRNA, clone: BRF 34-E9, induced by treatment of LPS and Con A/PMA	--	--	--	--	Q9BQQ7	163	1.65e-12	Receptor-transporting protein 3 OS=Homo sapiens GN=RTP3 PE=2 SV=1	--	--	--	--	--	--	--	--	--	--
c68879_g1	0.47753	19.3067	-5.3374	0.0051483	1413	554867561	XP_005943795.1	1213	3.32e-155	PREDICTED: muscle, skeletal receptor tyrosine protein kinase-like [Haplochromis burtoni]	542201346	XM_003440254.2	477	0	PREDICTED: Oreochromis niloticus muscle, skeletal receptor tyrosine protein kinase-like (LOC100710914), transcript variant X1, mRNA	K05129	MUSK	muscle, skeletal, receptor tyrosine kinase	http://www.genome.jp/dbget-bin/www_bget?ko:K05129	O15146	1012	3.36e-126	Muscle, skeletal receptor tyrosine-protein kinase OS=Homo sapiens GN=MUSK PE=1 SV=1	PF07714//PF00069	Protein tyrosine kinase//Protein kinase domain	GO:0006468	protein phosphorylation	GO:0004672//GO:0005524	protein kinase activity//ATP binding	--	--	KOG1026	Nerve growth factor receptor TRKA and related tyrosine kinases
c146511_g1	0	15.2624	#NAME?	0.0054383	628	--	--	--	--	--	--	--	--	--	--	--	--	--	--	--	--	--	--	--	--	--	--	--	--	--	--	--	--
c69793_g1	1.92764	61.0495	-4.9851	0.0055169	2354	617397560	XP_007551321.1	1613	0	PREDICTED: nuclear factor 7, ovary-like [Poecilia formosa]	542256813	XM_005463841.1	558	0	PREDICTED: Oreochromis niloticus E3 ubiquitin-protein ligase TRIM39-like (LOC102076267), mRNA	--	--	--	--	Q91431	385	1.35e-37	Nuclear factor 7, ovary OS=Xenopus laevis PE=2 SV=1	PF00622	SPRY domain	--	--	GO:0005515	protein binding	--	--	--	--
c99768_g1	6.26047	76.5202	-3.6115	0.0055385	3175	617472791	XP_007575961.1	2785	0	PREDICTED: choline transporter-like protein 4 [Poecilia formosa]	554852189	XM_005936268.1	962	0	PREDICTED: Haplochromis burtoni choline transporter-like protein 4-like (LOC102289730), transcript variant X2, mRNA	K15377	SLC44A2_4_5	solute carrier family 44 (choline transporter-like protein), member 2/4/5	http://www.genome.jp/dbget-bin/www_bget?ko:K15377	Q7T2B0	2457	0	Choline transporter-like protein 4 OS=Danio rerio GN=slc44a4 PE=2 SV=1	--	--	--	--	--	--	--	--	KOG1362	Choline transporter-like protein
c155453_g1	0	13.0529	#NAME?	0.0055563	878	--	--	--	--	--	374428414	FQ310506.3	485	0	Dicentrarchus labrax chromosome sequence corresponding to linkage group 1, top part, complete sequence	--	--	--	--	--	--	--	--	PF00537	Scorpion toxin-like domain	GO:0006810	transport	GO:0008200	ion channel inhibitor activity	GO:0005576	extracellular region	--	--
c83444_g1	2238.67	35.4221	5.9818	0.0055611	1311	548338619	XP_005721958.1	1227	5.31e-165	PREDICTED: sulfotransferase family cytosolic 2B member 1-like [Pundamilia nyererei]	542214834	XM_003438659.2	383	0	PREDICTED: Oreochromis niloticus sulfotransferase family cytosolic 2B member 1-like (LOC100689712), transcript variant X1, mRNA	K01015	SULT2B1	alcohol sulfotransferase	http://www.genome.jp/dbget-bin/www_bget?ko:K01015	O35400	704	4.08e-87	Sulfotransferase family cytosolic 2B member 1 OS=Mus musculus GN=Sult2b1 PE=2 SV=2	PF00685	Sulfotransferase domain	--	--	GO:0008146	sulfotransferase activity	--	--	KOG1584	Sulfotransferase
c51351_g1	0	12.8917	#NAME?	0.0056158	515	358357308	AEU08494.1	358	2.1e-40	gastrin [Diplodus sargus]	358357307	JN210580.1	209	7.5e-104	Diplodus sargus gastrin mRNA, complete cds	--	--	--	--	--	--	--	--	PF00918	Gastrin/cholecystokinin family	GO:0007165	signal transduction	GO:0005179	hormone activity	GO:0005576	extracellular region	--	--
c91869_g1	0.47753	18.6713	-5.2891	0.005659	1039	617420850	XP_007558426.1	877	3.36e-114	PREDICTED: CD63 antigen-like [Poecilia formosa]	554817949	XM_005919680.1	257	3.24e-130	PREDICTED: Haplochromis burtoni CD63 antigen-like (LOC102308357), mRNA	--	--	--	--	P41731	293	3.5e-29	CD63 antigen OS=Mus musculus GN=Cd63 PE=1 SV=2	PF00335	Tetraspanin family	--	--	--	--	GO:0016021	integral component of membrane	KOG3882	Tetraspanin family integral membrane protein
c35439_g1	1.46764	28.0829	-4.2581	0.0059852	771	229366650	ACQ58305.1	432	9.32e-50	PTB domain-containing engulfment adapter protein 1 [Anoplopoma fimbria]	--	--	--	--	--	--	--	--	--	Q9UBP9	153	1.66e-10	PTB domain-containing engulfment adapter protein 1 OS=Homo sapiens GN=GULP1 PE=1 SV=1	PF00640//PF08416	Phosphotyrosine interaction domain (PTB/PID)//Phosphotyrosine-binding domain	--	--	GO:0005515	protein binding	--	--	KOG3536	Adaptor protein CED-6, contains PTB domain
c101366_g1	6.72047	78.4073	-3.5444	0.0060483	1518	657596752	XP_008303094.1	1478	0	PREDICTED: purine nucleoside phosphorylase-like [Stegastes partitus]	306921985	AB490835.1	664	0	Sebastes schlegelii mRNA, clone: BRF 11-G6, induced by treatment of LPS	K03783	punA	purine-nucleoside phosphorylase	http://www.genome.jp/dbget-bin/www_bget?ko:K03783	P55859	999	4.77e-131	Purine nucleoside phosphorylase OS=Bos taurus GN=PNP PE=1 SV=3	PF01048	Phosphorylase superfamily	GO:0009116	nucleoside metabolic process	GO:0003824	catalytic activity	--	--	KOG3984	Purine nucleoside phosphorylase
c74733_g1	444.02	43.7105	3.3446	0.0062186	1707	657580780	XP_008294370.1	885	2.89e-112	PREDICTED: lecithin retinol acyltransferase-like [Stegastes partitus]	542247347	XM_003455542.2	449	0	PREDICTED: Oreochromis niloticus lecithin retinol acyltransferase-like (LOC100692382), mRNA	K00678	LRAT	phosphatidylcholine-retinol O-acyltransferase	http://www.genome.jp/dbget-bin/www_bget?ko:K00678	O95237	587	1.12e-69	Lecithin retinol acyltransferase OS=Homo sapiens GN=LRAT PE=1 SV=2	PF15202//PF11837//PF08496	Adipogenin//Domain of unknown function (DUF3357)//Peptidase family S49 N-terminal	GO:0006012//GO:0005985//GO:0045444//GO:0005982	galactose metabolic process//sucrose metabolic process//fat cell differentiation//starch metabolic process	GO:0004564//GO:0004575//GO:0004252	beta-fructofuranosidase activity//sucrose alpha-glucosidase activity//serine-type endopeptidase activity	GO:0017177//GO:0005886	glucosidase II complex//plasma membrane	--	--
c54014_g1	13.1562	0	Inf	0.0064172	367	--	--	--	--	--	--	--	--	--	--	--	--	--	--	--	--	--	--	--	--	--	--	--	--	--	--	--	--
c85813_g1	19.1144	0.474136	5.3332	0.0064834	1326	554835164	XP_005928082.1	503	1.42e-55	PREDICTED: fibrinogen-like protein 1-like [Haplochromis burtoni]	548448176	XM_005746631.1	111	6.04e-49	PREDICTED: Pundamilia nyererei fibrinogen-like protein 1-like (LOC102199887), mRNA	--	--	--	--	Q71KU9	195	3.71e-15	Fibrinogen-like protein 1 OS=Mus musculus GN=Fgl1 PE=2 SV=2	PF07657	N terminus of Notch ligand	GO:0007275//GO:0007219	multicellular organismal development//Notch signaling pathway	--	--	GO:0016021	integral component of membrane	--	--
c68401_g1	5460.73	605.461	3.173	0.0064914	1609	401664028	BAM36395.1	132	9.85e-06	CD9 antigen 2 [Oplegnathus fasciatus]	401664027	AB665354.1	129	7.26e-59	Oplegnathus fasciatus CD9 mRNA for CD9 antigen 2, complete cds, clone: 004_07-G03	--	--	--	--	--	--	--	--	--	--	--	--	--	--	--	--	--	--
c30221_g1	101.39	8.54387	3.5689	0.0065768	361	--	--	--	--	--	--	--	--	--	--	--	--	--	--	--	--	--	--	--	--	--	--	--	--	--	--	--	--
c59152_g1	0.47753	18.2066	-5.2527	0.0066798	853	--	--	--	--	--	374428415	FQ310507.3	41	3.14e-10	Dicentrarchus labrax chromosome sequence corresponding to linkage group 1, bottom part, complete sequence	--	--	--	--	--	--	--	--	--	--	--	--	--	--	--	--	--	--
c88046_g1	13.476	134	-3.3138	0.0068812	1613	641967418	CDR00458.1	981	2.27e-126	unnamed protein product [Oncorhynchus mykiss]	542240695	XM_003452846.2	298	8.23e-153	PREDICTED: Oreochromis niloticus myeloid-associated differentiation marker-like (LOC100698775), mRNA	--	--	--	--	Q63ZU3	544	1.15e-62	Myeloid-associated differentiation marker homolog OS=Xenopus laevis GN=myadm PE=2 SV=1	PF01284	Membrane-associating domain	--	--	--	--	GO:0016020	membrane	--	--
c98664_g1	6.70295	74.453	-3.4735	0.0071989	3125	548342513	XP_005723748.1	1675	0	PREDICTED: uncharacterized protein LOC102193427 isoform X1 [Pundamilia nyererei] >gi|548342515|ref|XP_005723749.1| PREDICTED: uncharacterized protein LOC102193427 isoform X2 [Pundamilia nyererei]	548342514	XM_005723692.1	597	0	PREDICTED: Pundamilia nyererei uncharacterized LOC102193427 (LOC102193427), transcript variant X2, mRNA	--	--	--	--	Q19417	176	1.18e-11	UPF0392 protein F13G3.3 OS=Caenorhabditis elegans GN=F13G3.3 PE=3 SV=2	--	--	--	--	--	--	--	--	--	--
c96810_g1	51.6346	4.27665	3.5938	0.0072183	1803	--	--	--	--	--	--	--	--	--	--	--	--	--	--	--	--	--	--	--	--	--	--	--	--	--	--	--	--
c80531_g1	3.89034	49.0632	-3.6567	0.0072467	769	554886343	XP_005952753.1	389	5.96e-43	PREDICTED: type-2 ice-structuring protein-like [Haplochromis burtoni]	--	--	--	--	--	--	--	--	--	P05140	172	7.15e-14	Type-2 ice-structuring protein OS=Hemitripterus americanus PE=1 SV=2	PF04082//PF00059//PF00706	Fungal specific transcription factor domain//Lectin C-type domain//Anenome neurotoxin	GO:0006351//GO:0009966	transcription, DNA-templated//regulation of signal transduction	GO:0008270//GO:0003677//GO:0030246	zinc ion binding//DNA binding//carbohydrate binding	GO:0005576//GO:0005634	extracellular region//nucleus	--	--
c86404_g1	12.5735	122.511	-3.2845	0.0072568	1240	317419668	CBN81705.1	528	1.05e-62	Protein atad4-A [Dicentrarchus labrax]	374428415	FQ310507.3	390	0	Dicentrarchus labrax chromosome sequence corresponding to linkage group 1, bottom part, complete sequence	--	--	--	--	Q566Z6	330	1.94e-35	Proline-rich protein 15-like protein B OS=Danio rerio GN=prr15lb PE=3 SV=1	PF07473//PF02468	Spasmodic peptide gm9a//Photosystem II reaction centre N protein (psbN)	GO:0015979//GO:0009405	photosynthesis//pathogenesis	--	--	GO:0009539//GO:0009523//GO:0005576//GO:0016020	photosystem II reaction center//photosystem II//extracellular region//membrane	--	--
c49668_g1	42.2987	2.84482	3.8942	0.0072587	1692	498939864	XP_004541956.1	1069	2.99e-140	PREDICTED: fibronectin type III domain-containing protein 4-like isoform X1 [Maylandia zebra] >gi|554807044|ref|XP_005914446.1| PREDICTED: fibronectin type III domain-containing protein 4-like isoform X1 [Haplochromis burtoni] >gi|584004441|ref|XP_006797223.1| PREDICTED: fibronectin type III domain-containing protein 4-like [Neolamprologus brichardi]	542247682	XM_005460311.1	489	0	PREDICTED: Oreochromis niloticus fibronectin type III domain-containing protein 4-like (LOC100711335), transcript variant X2, mRNA	--	--	--	--	Q3TR08	628	1.03e-75	Fibronectin type III domain-containing protein 4 OS=Mus musculus GN=Fndc4 PE=2 SV=1	PF02088//PF11837//PF00041	Ornatin//Domain of unknown function (DUF3357)//Fibronectin type III domain	GO:0006012//GO:0005985//GO:0007155//GO:0005982//GO:0030193	galactose metabolic process//sucrose metabolic process//cell adhesion//starch metabolic process//regulation of blood coagulation	GO:0004564//GO:0005515//GO:0004575	beta-fructofuranosidase activity//protein binding//sucrose alpha-glucosidase activity	GO:0017177//GO:0005576	glucosidase II complex//extracellular region	--	--
c81454_g1	0	12.7494	#NAME?	0.0073312	944	657591252	XP_008300101.1	492	2.01e-57	PREDICTED: cytolysin Src-1-like [Stegastes partitus]	--	--	--	--	--	--	--	--	--	Q5R231	136	2.87e-08	Hemolytic toxin Avt-1 OS=Actineria villosa PE=1 SV=1	PF01764//PF05826//PF06369	Lipase (class 3)//Phospholipase A2//Sea anemone cytotoxic protein	GO:0052331//GO:0009395//GO:0006810//GO:0006812//GO:0046931//GO:0006629//GO:0046486//GO:0016042	hemolysis in other organism involved in symbiotic interaction//phospholipid catabolic process//transport//cation transport//pore complex assembly//lipid metabolic process//glycerolipid metabolic process//lipid catabolic process	GO:0004806//GO:0004623//GO:0015267//GO:0005509	triglyceride lipase activity//phospholipase A2 activity//channel activity//calcium ion binding	GO:0046930	pore complex	--	--
c82156_g1	37.278	2.69305	3.791	0.0073738	1314	657582977	XP_008295571.1	540	2.04e-59	PREDICTED: sterol 26-hydroxylase, mitochondrial-like [Stegastes partitus]	--	--	--	--	--	K00488	CYP27A	cholestanetriol 26-monooxygenase	http://www.genome.jp/dbget-bin/www_bget?ko:K00488	Q9DBG1	362	2.44e-36	Sterol 26-hydroxylase, mitochondrial OS=Mus musculus GN=Cyp27a1 PE=1 SV=1	PF00067//PF01578	Cytochrome P450//Cytochrome C assembly protein	GO:0006461//GO:0055114//GO:0008535	protein complex assembly//oxidation-reduction process//respiratory chain complex IV assembly	GO:0016705//GO:0005506//GO:0020037	oxidoreductase activity, acting on paired donors, with incorporation or reduction of molecular oxygen//iron ion binding//heme binding	GO:0016020	membrane	KOG0159	Cytochrome P450 CYP11/CYP12/CYP24/CYP27 subfamilies
c106476_g3	268.092	29.9271	3.1632	0.0075535	3186	657545724	XP_008278152.1	2149	0	PREDICTED: nuclear factor interleukin-3-regulated protein-like [Stegastes partitus]	542243058	XM_005458563.1	850	0	PREDICTED: Oreochromis niloticus nuclear factor interleukin-3-regulated protein-like (LOC100693993), transcript variant X2, mRNA	K09059	NFIL3, E4BP4	nuclear factor, interleukin 3 regulated	http://www.genome.jp/dbget-bin/www_bget?ko:K09059	Q5FW38	372	4.88e-36	Nuclear factor interleukin-3-regulated protein OS=Xenopus tropicalis GN=nfil3 PE=2 SV=1	PF07716//PF00170	Basic region leucine zipper//bZIP transcription factor	GO:0006355	regulation of transcription, DNA-templated	GO:0043565//GO:0003700	sequence-specific DNA binding//sequence-specific DNA binding transcription factor activity	GO:0005667	transcription factor complex	KOG3119	Basic region leucine zipper transcription factor
c76986_g1	46.2942	3.64133	3.6683	0.0076106	698	--	--	--	--	--	--	--	--	--	--	--	--	--	--	--	--	--	--	--	--	--	--	--	--	--	--	--	--
c92304_g1	0.972585	21.5162	-4.4675	0.0077308	1610	617435398	XP_007563270.1	417	5.01e-45	PREDICTED: gastric intrinsic factor-like [Poecilia formosa]	--	--	--	--	--	--	--	--	--	--	--	--	--	--	--	--	--	--	--	--	--	--	--
c65298_g1	5.76541	138.229	-4.5835	0.0079033	446	--	--	--	--	--	--	--	--	--	--	--	--	--	--	--	--	--	--	--	--	--	--	--	--	--	--	--	--
c70881_g1	1.45011	26.2764	-4.1795	0.0080672	963	554860972	XP_005940596.1	1352	0	PREDICTED: P2X purinoceptor 4-like [Haplochromis burtoni]	112420127	BT026944.1	499	0	Gasterosteus aculeatus clone CFW111-G02 mRNA sequence	K05218	P2RX4	P2X purinoceptor 4	http://www.genome.jp/dbget-bin/www_bget?ko:K05218	Q99571	815	1.1e-104	P2X purinoceptor 4 OS=Homo sapiens GN=P2RX4 PE=1 SV=2	PF01445//PF00864	Viral small hydrophobic protein//ATP P2X receptor	GO:0007165//GO:0006811	signal transduction//ion transport	GO:0001614//GO:0005216//GO:0005524	purinergic nucleotide receptor activity//ion channel activity//ATP binding	GO:0016020	membrane	--	--
c182992_g1	12.2362	0	Inf	0.008188	417	--	--	--	--	--	--	--	--	--	--	--	--	--	--	--	--	--	--	--	--	--	--	--	--	--	--	--	--
c30689_g1	1.91012	31.1978	-4.0297	0.0082379	528	--	--	--	--	--	--	--	--	--	--	--	--	--	--	--	--	--	--	--	--	--	--	--	--	--	--	--	--
c32319_g1	17.489	0.554729	4.9785	0.0082581	653	--	--	--	--	--	--	--	--	--	--	--	--	--	--	--	--	--	--	--	--	--	--	--	--	--	--	--	--
c86942_g1	17.489	0.474136	5.205	0.0082891	1063	548404172	XP_005739333.1	630	2.96e-71	PREDICTED: uncharacterized protein LOC102193778 [Pundamilia nyererei]	--	--	--	--	--	--	--	--	--	--	--	--	--	--	--	--	--	--	--	--	--	--	--
c99792_g2	165.62	1351.98	-3.0291	0.008694	3459	472397095	CCP37739.1	2292	0	soluble toll-like receptor 5 [Sparus aurata]	256595614	GQ396667.1	999	0	Epinephelus coioides toll-like receptor 5S (TLR5S) mRNA, complete cds	K10168	TLR5	toll-like receptor 5	http://www.genome.jp/dbget-bin/www_bget?ko:K10168	Q9JLF7	753	5.66e-83	Toll-like receptor 5 OS=Mus musculus GN=Tlr5 PE=1 SV=1	PF03540//PF00560	Transcription initiation factor TFIID 23-30kDa subunit//Leucine Rich Repeat	GO:0006352	DNA-templated transcription, initiation	GO:0005515	protein binding	GO:0005634	nucleus	KOG4641	FOG: Toll/interleukin receptor and related proteins containing LRR and TIR repeats
c94342_g1	8.3283	92.0097	-3.4657	0.0089352	1532	584022933	XP_006806117.1	873	1.11e-109	PREDICTED: CMP-N-acetylneuraminate-beta-galactosamide-alpha-2,3-sialyltransferase 1-like [Neolamprologus brichardi]	551509458	XM_005806199.1	145	8.81e-68	PREDICTED: Xiphophorus maculatus CMP-N-acetylneuraminate-beta-galactosamide-alpha-2,3-sialyltransferase 1-like (LOC102218379), mRNA	K03368	SIAT4B	beta-galactoside alpha-2,3-sialyltransferase (sialyltransferase 4B)	http://www.genome.jp/dbget-bin/www_bget?ko:K03368	Q11200	599	1.2e-70	CMP-N-acetylneuraminate-beta-galactosamide-alpha-2,3-sialyltransferase 1 OS=Gallus gallus GN=ST3GAL1 PE=2 SV=1	PF00777	Glycosyltransferase family 29 (sialyltransferase)	GO:0006486	protein glycosylation	GO:0008373	sialyltransferase activity	--	--	KOG2692	Sialyltransferase
c10301_g1	39.2933	2.84482	3.7879	0.0091676	1022	225794844	ACO34807.1	1434	0	vitellogenin Ab, partial [Perca flavescens]	374923102	JQ283442.1	645	0	Dicentrarchus labrax vitellogenin Ab (vtgAb) mRNA, complete cds	--	--	--	--	Q98893	1278	1.54e-160	Vitellogenin-2 OS=Fundulus heteroclitus PE=1 SV=1	--	--	--	--	--	--	--	--	--	--
c3438_g1	0	11.5593	#NAME?	0.0092038	843	--	--	--	--	--	--	--	--	--	--	--	--	--	--	--	--	--	--	PF04086	Signal recognition particle, alpha subunit, N-terminal	GO:0006886//GO:0006184	intracellular protein transport//GTP catabolic process	GO:0003924//GO:0005047//GO:0005525	GTPase activity//signal recognition particle binding//GTP binding	GO:0005786//GO:0005785	signal recognition particle, endoplasmic reticulum targeting//signal recognition particle receptor complex	--	--
c92819_g2	13.1737	469.768	-5.1562	0.0092179	1905	657564725	XP_008285627.1	1082	2.89e-141	PREDICTED: claudin-15 [Stegastes partitus]	554830694	XM_005925856.1	371	0	PREDICTED: Haplochromis burtoni claudin-15-like (LOC102312102), mRNA	K06087	CLDN	claudin	http://www.genome.jp/dbget-bin/www_bget?ko:K06087	P56746	584	8.58e-69	Claudin-15 OS=Homo sapiens GN=CLDN15 PE=1 SV=1	PF00822//PF13903	PMP-22/EMP/MP20/Claudin family//PMP-22/EMP/MP20/Claudin tight junction	--	--	--	--	GO:0016021	integral component of membrane	--	--
c90691_g1	0	11.4787	#NAME?	0.009257	761	--	--	--	--	--	--	--	--	--	--	--	--	--	--	--	--	--	--	--	--	--	--	--	--	--	--	--	--
c95452_g1	3.37776	41.0646	-3.6038	0.0093357	2013	542253687	XP_005462681.1	1368	0	PREDICTED: pogo transposable element with KRAB domain-like [Oreochromis niloticus]	44917673	AC146542.2	558	0	Gasterosteus aculeatus clone CH213-58L3, complete sequence	--	--	--	--	Q9P215	519	1.93e-55	Pogo transposable element with KRAB domain OS=Homo sapiens GN=POGK PE=1 SV=2	PF03184//PF03971	DDE superfamily endonuclease//Monomeric isocitrate dehydrogenase	GO:0055114//GO:0019643//GO:0006749//GO:0006099	oxidation-reduction process//reductive tricarboxylic acid cycle//glutathione metabolic process//tricarboxylic acid cycle	GO:0003676//GO:0004450	nucleic acid binding//isocitrate dehydrogenase (NADP+) activity	--	--	KOG3105	DNA-binding centromere protein B (CENP-B)
c91644_g1	43.2537	3.64133	3.5703	0.0094113	1564	657801462	XP_008327844.1	1469	0	PREDICTED: lysophosphatidic acid receptor 1-A-like [Cynoglossus semilaevis]	410902636	XM_003964751.1	475	0	PREDICTED: Takifugu rubripes lysophosphatidic acid receptor 1-A-like (LOC101061104), mRNA	K04289	LPAR1, EDG2	lysophosphatidic acid receptor 1	http://www.genome.jp/dbget-bin/www_bget?ko:K04289	P61794	791	1.51e-98	Lysophosphatidic acid receptor 1 OS=Rattus norvegicus GN=Lpar1 PE=2 SV=1	PF00001	7 transmembrane receptor (rhodopsin family)	GO:0007186	G-protein coupled receptor signaling pathway	GO:0004930	G-protein coupled receptor activity	GO:0016021	integral component of membrane	KOG3656	FOG: 7 transmembrane receptor
c60047_g1	97.4206	9.88569	3.3008	0.0094432	850	--	--	--	--	--	--	--	--	--	--	--	--	--	--	--	--	--	--	--	--	--	--	--	--	--	--	--	--
c91511_g1	771.281	95.5516	3.0129	0.0094865	1170	221048071	ACL98143.1	399	2e-43	complement component c3, partial [Epinephelus coioides]	315570433	HQ259061.1	132	1.13e-60	Epinephelus coioides complement component c3 mRNA, complete cds	K03990	C3	complement component 3	http://www.genome.jp/dbget-bin/www_bget?ko:K03990	P98093	248	2.78e-21	Complement C3 (Fragment) OS=Oncorhynchus mykiss GN=c3 PE=1 SV=1	PF00078	Reverse transcriptase (RNA-dependent DNA polymerase)	GO:0006278	RNA-dependent DNA replication	GO:0003723//GO:0003964	RNA binding//RNA-directed DNA polymerase activity	--	--	KOG1075	FOG: Reverse transcriptase
c51896_g1	0	11.0757	#NAME?	0.0095376	1388	301344561	ADK74002.1	1956	0	pepsinogen A1 precursor [Lateolabrax japonicus]	301344560	HM565947.1	1243	0	Lateolabrax japonicus pepsinogen A1 precursor, mRNA, complete cds	K06002	PGA	pepsin A	http://www.genome.jp/dbget-bin/www_bget?ko:K06002	Q9GMY6	1108	1.06e-146	Pepsin A OS=Canis familiaris GN=PGA PE=2 SV=1	PF00026//PF07966	Eukaryotic aspartyl protease//A1 Propeptide	GO:0006508	proteolysis	GO:0004190	aspartic-type endopeptidase activity	--	--	KOG1339	Aspartyl protease
c74398_g1	0	11.0757	#NAME?	0.0095376	1013	657552465	XP_008280602.1	1294	3.56e-173	PREDICTED: bone morphogenetic protein 3B-like [Stegastes partitus]	542199881	XM_005474143.1	485	0	PREDICTED: Oreochromis niloticus bone morphogenetic protein 3B-like (LOC100711454), mRNA	K05496	BMP3_3B	bone morphogenetic protein 3/3B	http://www.genome.jp/dbget-bin/www_bget?ko:K05496	P55107	454	3.98e-50	Bone morphogenetic protein 3B OS=Homo sapiens GN=GDF10 PE=2 SV=1	PF00019	Transforming growth factor beta like domain	GO:0008283//GO:0007165//GO:0040007	cell proliferation//signal transduction//growth	GO:0008083	growth factor activity	--	--	KOG3900	Transforming growth factor beta, bone morphogenetic protein and related proteins
c84121_g1	1.43259	25.3375	-4.1446	0.0097251	1936	658856104	XP_008410698.1	1579	0	PREDICTED: mucin-5AC-like [Poecilia reticulata]	432863200	XM_004069972.1	160	5.13e-76	PREDICTED: Oryzias latipes mucin-2-like (LOC101166869), mRNA	K10955	MUC2	intestinal mucin-2	http://www.genome.jp/dbget-bin/www_bget?ko:K10955	P98089	801	2.13e-93	Intestinal mucin-like protein (Fragment) OS=Rattus norvegicus PE=2 SV=1	PF00093	von Willebrand factor type C domain	--	--	GO:0005515	protein binding	--	--	--	--
c101956_g2	59.3978	5.86024	3.3414	0.0098288	2538	657554406	XP_008281666.1	1501	0	PREDICTED: death domain-containing protein 1 [Stegastes partitus]	542232008	XM_005454397.1	677	0	PREDICTED: Oreochromis niloticus death domain-containing protein 1-like (LOC100696729), transcript variant X1, mRNA	--	--	--	--	Q6ZMT9	649	7.2e-71	Death domain-containing protein 1 OS=Homo sapiens GN=DTHD1 PE=2 SV=3	--	--	--	--	--	--	--	--	--	--
c99492_g1	77.982	614.643	-2.9785	0.0098672	1860	498942894	XP_004542448.1	2049	0	PREDICTED: angiopoietin-related protein 4-like [Maylandia zebra]	542205023	XM_003437768.2	808	0	PREDICTED: Oreochromis niloticus angiopoietin-related protein 4-like (LOC100696234), mRNA	K08767	ANGPTL4, PGAR	angiopoietin-like 4	http://www.genome.jp/dbget-bin/www_bget?ko:K08767	Q2KJ51	844	1.09e-104	Angiopoietin-related protein 4 OS=Bos taurus GN=ANGPTL4 PE=2 SV=1	PF00170//PF03592//PF04111//PF01576//PF10186//PF07926	bZIP transcription factor//Terminase small subunit//Autophagy protein Apg6//Myosin tail//UV radiation resistance protein and autophagy-related subunit 14//TPR/MLP1/MLP2-like protein	GO:0006355//GO:0006606//GO:0006323//GO:0010508//GO:0006914	regulation of transcription, DNA-templated//protein import into nucleus//DNA packaging//positive regulation of autophagy//autophagy	GO:0003700//GO:0043565//GO:0003774	sequence-specific DNA binding transcription factor activity//sequence-specific DNA binding//motor activity	GO:0005643//GO:0005667//GO:0016459	nuclear pore//transcription factor complex//myosin complex	KOG2579	Ficolin and related extracellular proteins
c92282_g1	31.3198	0.948272	5.0456	0.0099492	1849	--	--	--	--	--	--	--	--	--	--	--	--	--	--	--	--	--	--	--	--	--	--	--	--	--	--	--	--
c104617_g4	3.36024	39.4098	-3.5519	0.010961	937	--	--	--	--	--	--	--	--	--	--	--	--	--	--	--	--	--	--	--	--	--	--	--	--	--	--	--	--
c48992_g1	3.41281	38.3621	-3.4907	0.011034	1271	--	--	--	--	--	548539649	XM_005752865.1	532	0	PREDICTED: Pundamilia nyererei voltage-dependent calcium channel subunit alpha-2/delta-1-like (LOC102214688), transcript variant X2, mRNA	--	--	--	--	--	--	--	--	PF02683	Cytochrome C biogenesis protein transmembrane region	GO:0017004//GO:0055114	cytochrome complex assembly//oxidation-reduction process	--	--	GO:0016020	membrane	--	--
c78586_g1	0.47753	15.1106	-4.9838	0.011253	1038	657528397	XP_008290898.1	1364	2.64e-175	PREDICTED: LIM domain only protein 7-like isoform X4 [Stegastes partitus]	542169856	XM_005466899.1	315	1.86e-162	PREDICTED: Oreochromis niloticus LIM domain only protein 7-like (LOC100710239), transcript variant X8, mRNA	--	--	--	--	Q8WWI1	417	6.61e-43	LIM domain only protein 7 OS=Homo sapiens GN=LMO7 PE=1 SV=3	--	--	--	--	--	--	--	--	--	--
c100313_g1	1.45011	23.4221	-4.0136	0.011325	2285	657564824	XP_008285681.1	1058	0	PREDICTED: vacuolar protein 8-like [Stegastes partitus]	542208301	XM_005477326.1	251	1.57e-126	PREDICTED: Oreochromis niloticus vacuolar protein 8-like (LOC102078694), transcript variant X2, mRNA	--	--	--	--	Q2U5T5	211	8.63e-26	Vacuolar protein 8 OS=Aspergillus oryzae (strain ATCC 42149 / RIB 40) GN=vac8 PE=3 SV=1	PF03224//PF02985//PF00514	V-ATPase subunit H//HEAT repeat//Armadillo/beta-catenin-like repeat	GO:0006119//GO:0015991//GO:0015992	oxidative phosphorylation//ATP hydrolysis coupled proton transport//proton transport	GO:0005515//GO:0046961	protein binding//proton-transporting ATPase activity, rotational mechanism	GO:0000221	vacuolar proton-transporting V-type ATPase, V1 domain	KOG0167	FOG: Armadillo/beta-catenin-like repeats
c97575_g1	98.8049	771.659	-2.9653	0.011581	2090	657588373	XP_008298523.1	607	7e-69	PREDICTED: annexin A2-like isoform X2 [Stegastes partitus]	229367953	BT083250.1	295	4.99e-151	Anoplopoma fimbria clone afim-evh-518-311 Annexin A2 putative mRNA, complete cds	K17092	ANXA2	annexin A2	http://www.genome.jp/dbget-bin/www_bget?ko:K17092	Q07936	232	1.91e-19	Annexin A2 OS=Rattus norvegicus GN=Anxa2 PE=1 SV=2	PF01053//PF00191	Cys/Met metabolism PLP-dependent enzyme//Annexin	--	--	GO:0005509//GO:0030170//GO:0005544	calcium ion binding//pyridoxal phosphate binding//calcium-dependent phospholipid binding	--	--	KOG0819	Annexin
c102833_g1	10.1333	89.6442	-3.1451	0.011668	7419	657556500	XP_008282541.1	8562	0	PREDICTED: integrin beta-4 isoform X1 [Stegastes partitus] >gi|657556502|ref|XP_008282542.1| PREDICTED: integrin beta-4 isoform X1 [Stegastes partitus]	542214877	XM_005447963.1	3099	0	PREDICTED: Oreochromis niloticus integrin beta-4-like (LOC100691235), transcript variant X2, mRNA	K06525	ITGB4	integrin beta 4	http://www.genome.jp/dbget-bin/www_bget?ko:K06525	A2A863	3029	0	Integrin beta-4 OS=Mus musculus GN=Itgb4 PE=2 SV=1	PF03160//PF00041//PF09384//PF07562	Calx-beta domain//Fibronectin type III domain//UTP15 C terminal//Nine Cysteines Domain of family 3 GPCR	GO:0007154//GO:0007186//GO:0006364	cell communication//G-protein coupled receptor signaling pathway//rRNA processing	GO:0004930//GO:0005515	G-protein coupled receptor activity//protein binding	GO:0016021//GO:0005730	integral component of membrane//nucleolus	KOG1226	Integrin beta subunit (N-terminal portion of extracellular region)
c91751_g1	0.47753	14.7882	-4.9527	0.011872	1419	--	--	--	--	--	--	--	--	--	--	--	--	--	--	--	--	--	--	--	--	--	--	--	--	--	--	--	--
c103337_g3	205.141	24.9963	3.0368	0.011883	775	--	--	--	--	--	374428416	FQ310508.3	48	3.65e-14	Dicentrarchus labrax chromosome sequence corresponding to linkage group 18, complete sequence	--	--	--	--	--	--	--	--	--	--	--	--	--	--	--	--	--	--
c14295_g1	15.5964	0.554729	4.8133	0.011981	331	--	--	--	--	--	--	--	--	--	--	--	--	--	--	--	--	--	--	--	--	--	--	--	--	--	--	--	--
c96755_g1	2.4227	31.5913	-3.7048	0.011981	583	657556630	XP_008282605.1	598	4e-74	PREDICTED: phytanoyl-CoA dioxygenase domain-containing protein 1-like [Stegastes partitus]	498935838	XM_004540969.1	203	1.85e-100	PREDICTED: Maylandia zebra probable alpha-ketoglutarate-dependent hypophosphite dioxygenase-like (LOC101474899), mRNA	--	--	--	--	--	--	--	--	--	--	--	--	--	--	--	--	--	--
c85233_g1	15.6665	0.474136	5.0462	0.011987	637	597765704	XP_007246750.1	164	4.64e-11	PREDICTED: uncharacterized protein LOC103047685 [Astyanax mexicanus]	--	--	--	--	--	--	--	--	--	--	--	--	--	--	--	--	--	--	--	--	--	--	--
c67954_g1	15.5088	0.554729	4.8052	0.012034	1120	--	--	--	--	--	--	--	--	--	--	--	--	--	--	--	--	--	--	--	--	--	--	--	--	--	--	--	--
c105525_g1	0.95506	190.742	-7.6418	0.012176	1697	554826538	XP_005923895.1	211	5.41e-16	PREDICTED: uncharacterized protein LOC102289378 [Haplochromis burtoni]	--	--	--	--	--	--	--	--	--	--	--	--	--	--	--	--	--	--	--	--	--	--	--
c60305_g1	4.45549	44.5353	-3.3213	0.012208	1388	--	--	--	--	--	--	--	--	--	--	--	--	--	--	--	--	--	--	--	--	--	--	--	--	--	--	--	--
c106476_g4	200.427	26.3758	2.9258	0.012217	1267	--	--	--	--	--	548388123	XM_005735819.1	344	1.72e-178	PREDICTED: Pundamilia nyererei dentin sialophosphoprotein-like (LOC102202205), transcript variant X2, mRNA	--	--	--	--	--	--	--	--	PF05398	PufQ cytochrome subunit	GO:0030494//GO:0015979	bacteriochlorophyll biosynthetic process//photosynthesis	--	--	--	--	--	--
c103623_g1	5.39303	1861.82	-8.4314	0.012602	2681	657546803	XP_008278538.1	1485	0	PREDICTED: deleted in malignant brain tumors 1 protein-like [Stegastes partitus]	542248368	XM_005460569.1	483	0	PREDICTED: Oreochromis niloticus uromodulin-like (LOC102079000), mRNA	K18274	UMOD	uromodulin	http://www.genome.jp/dbget-bin/www_bget?ko:K18274	P07911	417	2.78e-41	Uromodulin OS=Homo sapiens GN=UMOD PE=1 SV=1	PF00530//PF07645	Scavenger receptor cysteine-rich domain//Calcium-binding EGF domain	GO:0007165	signal transduction	GO:0005509//GO:0005044	calcium ion binding//scavenger receptor activity	GO:0016020	membrane	--	--
c88648_g1	50.1713	376.039	-2.9059	0.013024	543	348508189	XP_003441637.1	162	5.91e-12	PREDICTED: lymphocyte antigen 6D-like [Oreochromis niloticus]	--	--	--	--	--	--	--	--	--	Q14210	112	2.65e-06	Lymphocyte antigen 6D OS=Homo sapiens GN=LY6D PE=1 SV=1	PF06839	GRF zinc finger	--	--	GO:0008270	zinc ion binding	--	--	--	--
c78111_g1	0	9.88569	#NAME?	0.013032	934	--	--	--	--	--	--	--	--	--	--	--	--	--	--	--	--	--	--	--	--	--	--	--	--	--	--	--	--
c101589_g3	23.4997	1.42241	4.0462	0.013238	1843	--	--	--	--	--	--	--	--	--	--	--	--	--	--	--	--	--	--	--	--	--	--	--	--	--	--	--	--
c96153_g1	31.0701	2.61246	3.572	0.013328	510	--	--	--	--	--	--	--	--	--	--	--	--	--	--	--	--	--	--	--	--	--	--	--	--	--	--	--	--
c94005_g1	0.47753	34.2372	-6.1638	0.013474	1555	548338190	XP_005721764.1	375	1.81e-36	PREDICTED: neuronal pentraxin-2-like [Pundamilia nyererei]	542215559	XM_003438564.2	158	5.31e-75	PREDICTED: Oreochromis niloticus neuronal pentraxin-2-like (LOC100707058), mRNA	--	--	--	--	O70340	260	6.62e-23	Neuronal pentraxin-2 OS=Mus musculus GN=Nptx2 PE=2 SV=1	PF03965	Penicillinase repressor	GO:0045892	negative regulation of transcription, DNA-templated	GO:0003677	DNA binding	--	--	--	--
c51132_g1	9.60318	81.1621	-3.0792	0.013537	698	--	--	--	--	--	--	--	--	--	--	--	--	--	--	--	--	--	--	--	--	--	--	--	--	--	--	--	--
c88721_g1	2.86518	32.9949	-3.5255	0.013568	1262	548398968	XP_005738220.1	669	6.11e-82	PREDICTED: amphiregulin-like [Pundamilia nyererei] >gi|554827866|ref|XP_005924537.1| PREDICTED: amphiregulin-like [Haplochromis burtoni]	548398967	XM_005738163.1	497	0	PREDICTED: Pundamilia nyererei amphiregulin-like (LOC102210930), mRNA	--	--	--	--	P15514	158	8.23e-11	Amphiregulin OS=Homo sapiens GN=AREG PE=1 SV=2	PF00008	EGF-like domain	--	--	GO:0005515	protein binding	--	--	--	--
c10230_g1	6.68542	164.79	-4.6235	0.01381	1843	657807135	XP_008330769.1	909	1.73e-115	PREDICTED: claudin-4-like [Cynoglossus semilaevis]	56308114	CR729796.2	290	2.64e-148	Tetraodon nigroviridis full-length cDNA	K06087	CLDN	claudin	http://www.genome.jp/dbget-bin/www_bget?ko:K06087	O35054	615	1.05e-73	Claudin-4 OS=Mus musculus GN=Cldn4 PE=1 SV=1	PF13903//PF07062//PF00822	PMP-22/EMP/MP20/Claudin tight junction//Clc-like//PMP-22/EMP/MP20/Claudin family	--	--	--	--	GO:0016021	integral component of membrane	--	--
c91555_g1	174.921	23.6827	2.8848	0.013836	444	--	--	--	--	--	--	--	--	--	--	--	--	--	--	--	--	--	--	--	--	--	--	--	--	--	--	--	--
c66559_g1	86.4724	9.48272	3.1889	0.013855	1279	554813046	XP_005917359.1	852	3.79e-110	PREDICTED: BCL2/adenovirus E1B 19 kDa protein-interacting protein 3-like [Haplochromis burtoni] >gi|584003588|ref|XP_006796803.1| PREDICTED: BCL2/adenovirus E1B 19 kDa protein-interacting protein 3-like [Neolamprologus brichardi]	542236797	XM_005456217.1	708	0	PREDICTED: Oreochromis niloticus BCL2/adenovirus E1B 19 kDa protein-interacting protein 3-like (LOC100705876), mRNA	K15464	BNIP3	BCL2/adenovirus E1B 19 kDa protein-interacting protein 3	http://www.genome.jp/dbget-bin/www_bget?ko:K15464	O55003	309	1.63e-31	BCL2/adenovirus E1B 19 kDa protein-interacting protein 3 OS=Mus musculus GN=Bnip3 PE=1 SV=1	PF06553	BNIP3	GO:0043065	positive regulation of apoptotic process	--	--	GO:0016021//GO:0005740	integral component of membrane//mitochondrial envelope	--	--
c2020_g1	52.5327	1.66419	4.9803	0.013999	626	--	--	--	--	--	542177189	XM_005468198.1	164	9.56e-79	PREDICTED: Oreochromis niloticus Kv channel-interacting protein 4-like (LOC100711851), transcript variant X7, mRNA	--	--	--	--	--	--	--	--	--	--	--	--	--	--	--	--	--	--
c126487_g1	10.1683	0	Inf	0.014194	572	--	--	--	--	--	--	--	--	--	--	--	--	--	--	--	--	--	--	--	--	--	--	--	--	--	--	--	--
c92990_g1	361.261	2638.37	-2.8685	0.014508	2650	542206585	XP_003448506.2	3297	0	PREDICTED: acetyl-coenzyme A synthetase, cytoplasmic isoform X1 [Oreochromis niloticus]	542206584	XM_003448458.2	1414	0	PREDICTED: Oreochromis niloticus acyl-CoA synthetase short-chain family member 2 (acss2), transcript variant X1, mRNA	K01895	ACSS, acs	acetyl-CoA synthetase	http://www.genome.jp/dbget-bin/www_bget?ko:K01895	Q9NR19	2450	0	Acetyl-coenzyme A synthetase, cytoplasmic OS=Homo sapiens GN=ACSS2 PE=1 SV=1	PF00501	AMP-binding enzyme	GO:0019643//GO:0006096//GO:0008152//GO:0006094//GO:0019427	reductive tricarboxylic acid cycle//glycolytic process//metabolic process//gluconeogenesis//acetyl-CoA biosynthetic process from acetate	GO:0003824//GO:0016208//GO:0003987	catalytic activity//AMP binding//acetate-CoA ligase activity	--	--	KOG1175	Acyl-CoA synthetase
c104946_g2	109.486	10.7534	3.3479	0.014582	2117	225903792	ACO35044.1	292	6.85e-25	Cyp2x [Larimichthys crocea]	225903791	FJ800569.1	173	3.33e-83	Larimichthys crocea Cyp2x (Cyp2x) mRNA, complete cds	K17858	CYP2X	cytochrome P450, family 2, subfamily X	http://www.genome.jp/dbget-bin/www_bget?ko:K17858	O18809	164	1.81e-10	Cytochrome P450 2F3 OS=Capra hircus GN=CYP2F3 PE=2 SV=1	PF00067	Cytochrome P450	GO:0055114	oxidation-reduction process	GO:0016705//GO:0005506//GO:0020037	oxidoreductase activity, acting on paired donors, with incorporation or reduction of molecular oxygen//iron ion binding//heme binding	--	--	KOG0156	Cytochrome P450 CYP2 subfamily
c99411_g1	3.89034	751.627	-7.594	0.014615	4387	675294864	AIL54060.1	4965	0	NKCC2 [Sciaenops ocellatus]	345500363	AB618555.1	1790	0	Paralichthys olivaceus fNKCC mRNA for Na-K-Cl cotransporter, complete cds	K14425	SLC12A1, NKCC2	solute carrier family 12 (sodium/potassium/chloride transporter), member 1	http://www.genome.jp/dbget-bin/www_bget?ko:K14425	P55016	3380	0	Solute carrier family 12 member 1 OS=Rattus norvegicus GN=Slc12a1 PE=1 SV=1	PF13520//PF00324	Amino acid permease//Amino acid permease	GO:0055085//GO:0006810//GO:0003333//GO:0006865	transmembrane transport//transport//amino acid transmembrane transport//amino acid transport	GO:0015171	amino acid transmembrane transporter activity	GO:0016020	membrane	KOG2083	Na+/K+ symporter
c8963_g1	14.5011	0.554729	4.7082	0.014722	428	--	--	--	--	--	--	--	--	--	--	--	--	--	--	--	--	--	--	--	--	--	--	--	--	--	--	--	--
c104156_g1	0.972585	17.5619	-4.1745	0.014917	1722	499048432	XP_004574764.1	1190	5.8e-156	PREDICTED: secretory phospholipase A2 receptor-like isoform X1 [Maylandia zebra] >gi|499048434|ref|XP_004574765.1| PREDICTED: secretory phospholipase A2 receptor-like isoform X2 [Maylandia zebra]	499025756	XM_004563568.1	207	3.4e-102	PREDICTED: Maylandia zebra C-type mannose receptor 2-like (LOC101474341), mRNA	--	--	--	--	Q13018	191	1.32e-13	Secretory phospholipase A2 receptor OS=Homo sapiens GN=PLA2R1 PE=1 SV=2	PF00059//PF00193	Lectin C-type domain//Extracellular link domain	GO:0007155	cell adhesion	GO:0030246//GO:0005540	carbohydrate binding//hyaluronic acid binding	--	--	KOG4297	C-type lectin
c56976_g1	1.92764	25.8117	-3.7431	0.014923	751	--	--	--	--	--	--	--	--	--	--	--	--	--	--	--	--	--	--	--	--	--	--	--	--	--	--	--	--
c98021_g1	0.47753	68.0715	-7.1553	0.014952	1219	--	--	--	--	--		--	--	--	--	--	--	--	--	--	--	--	--	PF03233	Aphid transmission protein	GO:0019089	transmission of virus	--	--	--	--	--	--
c186984_g1	22.5272	1.66419	3.7588	0.01501	444	--	--	--	--	--		--	--	--	--	--	--	--	--	--	--	--	--	--	--	--	--	--	--	--	--	--	--
c70846_g1	69.7764	8.5533	3.0282	0.015219	309	--	--	--	--	--	--	--	--	--	--	--	--	--	--	--	--	--	--	--	--	--	--	--	--	--	--	--	--
c23370_g1	55.1	6.33438	3.1208	0.015444	648	--	--	--	--	--	--	--	--	--	--	--	--	--	--	--	--	--	--	--	--	--	--	--	--	--	--	--	--
c90771_g1	20.8142	160.076	-2.9431	0.015468	2000	657544379	XP_008277657.1	2127	0	PREDICTED: high affinity cGMP-specific 3',5'-cyclic phosphodiesterase 9A [Stegastes partitus]	542249270	XM_005460904.1	831	0	PREDICTED: Oreochromis niloticus high affinity cGMP-specific 3',5'-cyclic phosphodiesterase 9A-like (LOC100699962), transcript variant X2, mRNA	K13761	PDE9	high affinity cGMP-specific 3',5'-cyclic phosphodiesterase 9	http://www.genome.jp/dbget-bin/www_bget?ko:K13761	O76083	1873	0	High affinity cGMP-specific 3',5'-cyclic phosphodiesterase 9A OS=Homo sapiens GN=PDE9A PE=1 SV=1	PF00233	3'5'-cyclic nucleotide phosphodiesterase	GO:0006144//GO:0007165	purine nucleobase metabolic process//signal transduction	GO:0004114	3',5'-cyclic-nucleotide phosphodiesterase activity	--	--	KOG3689	Cyclic nucleotide phosphodiesterase
c92422_g1	230.932	33.0231	2.8059	0.015591	2765	--	--	--	--	--	--	--	--	--	--	--	--	--	--	--	--	--	--	PF03744//PF03333	6-carboxyhexanoate--CoA ligase//Adhesin biosynthesis transcription regulatory protein	GO:0006768//GO:0006355//GO:0009102	biotin metabolic process//regulation of transcription, DNA-templated//biotin biosynthetic process	GO:0005524//GO:0042410	ATP binding//6-carboxyhexanoate-CoA ligase activity	--	--	--	--
c102433_g1	4.79283	44.4641	-3.2137	0.016106	3756	657568328	XP_008287593.1	3557	0	PREDICTED: unconventional myosin-XVB-like [Stegastes partitus]	554879702	XM_005949587.1	657	0	PREDICTED: Haplochromis burtoni unconventional myosin-XV-like (LOC102293380), mRNA	K10361	MYO15	myosin XV	http://www.genome.jp/dbget-bin/www_bget?ko:K10361	Q9UKN7	1308	1e-149	Unconventional myosin-XV OS=Homo sapiens GN=MYO15A PE=1 SV=2	PF00018//PF02724//PF00784	SH3 domain//CDC45-like protein//MyTH4 domain	GO:0006270	DNA replication initiation	GO:0005515	protein binding	GO:0005856	cytoskeleton	KOG4229	Myosin VII, myosin IXB and related myosins
c10392_g1	14.0762	0.554729	4.6653	0.016268	211	--	--	--	--	--	--	--	--	--	--	--	--	--	--	--	--	--	--	--	--	--	--	--	--	--	--	--	--
c90093_g1	21.7517	1.42241	3.9347	0.016295	1920	--	--	--	--	--	--	--	--	--	--	--	--	--	--	--	--	--	--	PF05669	SOH1	GO:0006355	regulation of transcription, DNA-templated	GO:0001104	RNA polymerase II transcription cofactor activity	GO:0016592	mediator complex	--	--
c45441_g1	1.43259	20.6485	-3.8493	0.016337	838	657537596	XP_008275225.1	579	1.33e-71	PREDICTED: golgi-associated plant pathogenesis-related protein 1-like [Stegastes partitus]	112421182	BT027943.1	213	7.49e-106	Gasterosteus aculeatus clone CNB76-E01 mRNA sequence	--	--	--	--	Q9CYL5	311	3.94e-33	Golgi-associated plant pathogenesis-related protein 1 OS=Mus musculus GN=Glipr2 PE=2 SV=3	--	--	--	--	--	--	--	--	KOG3017	Defense-related protein containing SCP domain
c98960_g1	7427.24	1096.2	2.7603	0.016359	1619	77403694	BAE46429.1	176	3.51e-21	ORF2-encoded protein [Danio rerio]	--	--	--	--	--	--	--	--	--	--	--	--	--	--	--	--	--	--	--	--	--	--	--
c104287_g2	330.495	48.0531	2.7819	0.016414	4393	--	--	--	--	--	542237139	XM_003451788.2	50	1.65e-14	PREDICTED: Oreochromis niloticus LON peptidase N-terminal domain and ring finger 3 (lonrf3), mRNA	--	--	--	--	--	--	--	--	PF08715	Papain like viral protease	GO:0006508	proteolysis	GO:0008242//GO:0016740//GO:0004197	omega peptidase activity//transferase activity//cysteine-type endopeptidase activity	--	--	--	--
c101794_g1	9.67327	0	Inf	0.016431	407	--	--	--	--	--	--	--	--	--	--	--	--	--	--	--	--	--	--	--	--	--	--	--	--	--	--	--	--
c105501_g2	14.4836	110.876	-2.9364	0.016546	3767	657571737	XP_008289452.1	2366	0	PREDICTED: probable G-protein coupled receptor 113 [Stegastes partitus]	--	--	--	--	--	K08456	GPR113	G protein-coupled receptor 113	http://www.genome.jp/dbget-bin/www_bget?ko:K08456	Q9WVT0	418	4.66e-42	Probable G-protein coupled receptor 116 OS=Rattus norvegicus GN=Gpr116 PE=1 SV=1	PF01563//PF00002//PF07645//PF01825	Alphavirus E3 glycoprotein//7 transmembrane receptor (Secretin family)//Calcium-binding EGF domain//Latrophilin/CL-1-like GPS domain	GO:0007186//GO:0007218	G-protein coupled receptor signaling pathway//neuropeptide signaling pathway	GO:0004252//GO:0004930//GO:0005509	serine-type endopeptidase activity//G-protein coupled receptor activity//calcium ion binding	GO:0016020//GO:0016021//GO:0019028//GO:0055036	membrane//integral component of membrane//viral capsid//virion membrane	KOG4193	G protein-coupled receptors
c93132_g2	8933.13	1285.48	2.7969	0.016561	2599	499034945	XP_004568153.1	963	5.11e-120	PREDICTED: nuclear receptor coactivator 7-like [Maylandia zebra]	499034944	XM_004568096.1	399	0	PREDICTED: Maylandia zebra nuclear receptor coactivator 7-like (LOC101484565), mRNA	--	--	--	--	Q8NI08	680	4.6e-74	Nuclear receptor coactivator 7 OS=Homo sapiens GN=NCOA7 PE=1 SV=2	--	--	--	--	--	--	--	--	KOG2372	Oxidation resistance protein
c6714_g1	160.936	20.549	2.9693	0.016698	821	--	--	--	--	--	--	--	--	--	--	--	--	--	--	--	--	--	--	--	--	--	--	--	--	--	--	--	--
c89737_g1	0.972585	63.9174	-6.0382	0.0174	936	432957901	XP_004085934.1	430	4.21e-48	PREDICTED: heat shock protein 30-like [Oryzias latipes] >gi|432957903|ref|XP_004085935.1| PREDICTED: heat shock protein 30-like [Oryzias latipes]	306922108	AB490958.1	137	1.49e-63	Sebastes schlegelii mRNA, clone: BRF 35-H4, induced by treatment of LPS	--	--	--	--	P42931	375	2.15e-41	Heat shock protein 30 OS=Oncorhynchus tshawytscha GN=hsp30 PE=2 SV=1	--	--	--	--	--	--	--	--	KOG3591	Alpha crystallins
c93955_g1	0.495054	13.2141	-4.7383	0.017415	840	657556882	XP_008282698.1	512	6.25e-55	PREDICTED: lymphoid-restricted membrane protein [Stegastes partitus]	542225119	XM_005451790.1	321	6.89e-166	PREDICTED: Oreochromis niloticus myosin-13-like (LOC100708076), transcript variant X6, mRNA	--	--	--	--	Q5RHB5	202	4.07e-16	Lymphoid-restricted membrane protein OS=Danio rerio GN=lrmp PE=1 SV=2	--	--	--	--	--	--	--	--	--	--
c80342_g1	70.2364	8.46328	3.0529	0.017422	863	124020700	ABM88795.1	890	8.84e-115	betaine homocysteine S-methyltansferase [Paralichthys olivaceus]	124020699	EF198069.1	374	0	Paralichthys olivaceus betaine homocysteine S-methyltansferase (BHMT) mRNA, complete cds	K00544	BHMT	betaine-homocysteine S-methyltransferase	http://www.genome.jp/dbget-bin/www_bget?ko:K00544	Q32LQ4	833	8.29e-108	Betaine--homocysteine S-methyltransferase 1 OS=Danio rerio GN=bhmt PE=2 SV=1	PF02574	Homocysteine S-methyltransferase	GO:0006555	methionine metabolic process	GO:0008898	S-adenosylmethionine-homocysteine S-methyltransferase activity	--	--	--	--
c44813_g1	21.3268	1.42241	3.9063	0.017424	906	--	--	--	--	--	--	--	--	--	--	--	--	--	--	--	--	--	--	PF01231	Indoleamine 2,3-dioxygenase	--	--	GO:0020037	heme binding	--	--	--	--
c78804_g1	100.496	678.738	-2.7557	0.01771	3903	657560610	XP_008284038.1	1204	6.66e-150	PREDICTED: hepatic leukemia factor-like [Stegastes partitus]	542234621	XM_005455368.1	1274	0	PREDICTED: Oreochromis niloticus hepatic leukemia factor-like (LOC100698155), transcript variant X2, mRNA	K09057	HLF	hepatic leukemia factor	http://www.genome.jp/dbget-bin/www_bget?ko:K09057	Q16534	452	1.29e-47	Hepatic leukemia factor OS=Homo sapiens GN=HLF PE=2 SV=1	PF00170//PF07716//PF09726//PF10717//PF03131	bZIP transcription factor//Basic region leucine zipper//Transmembrane protein//Occlusion-derived virus envelope protein ODV-E18//bZIP Maf transcription factor	GO:0006355	regulation of transcription, DNA-templated	GO:0003677//GO:0003700//GO:0043565	DNA binding//sequence-specific DNA binding transcription factor activity//sequence-specific DNA binding	GO:0016021//GO:0005634//GO:0005667//GO:0019031	integral component of membrane//nucleus//transcription factor complex//viral envelope	KOG3119	Basic region leucine zipper transcription factor
c103303_g1	57.4219	382.45	-2.7356	0.017838	2569	551490608	XP_005796876.1	826	3.75e-100	PREDICTED: claudin-8-like [Xiphophorus maculatus]	542233717	XM_005455035.1	347	7.62e-180	PREDICTED: Oreochromis niloticus claudin-8-like (LOC100705610), mRNA	K06087	CLDN	claudin	http://www.genome.jp/dbget-bin/www_bget?ko:K06087	P56748	460	1.85e-50	Claudin-8 OS=Homo sapiens GN=CLDN8 PE=2 SV=1	PF07062//PF00822//PF13903	Clc-like//PMP-22/EMP/MP20/Claudin family//PMP-22/EMP/MP20/Claudin tight junction	--	--	--	--	GO:0016021	integral component of membrane	--	--
c79309_g1	17.3663	1.02887	4.0772	0.017976	662	--	--	--	--	--	--	--	--	--	--	--	--	--	--	--	--	--	--	--	--	--	--	--	--	--	--	--	--
c103495_g2	0.972585	54.7287	-5.8143	0.018102	6850	348520491	XP_003447761.1	7509	0	PREDICTED: fer-1-like protein 4-like [Oreochromis niloticus]	542185899	XM_003447713.2	3043	0	PREDICTED: Oreochromis niloticus fer-1-like protein 4-like (LOC100698227), mRNA	--	--	--	--	A3KGK3	1930	0	Fer-1-like protein 4 OS=Mus musculus GN=Fer1l4 PE=2 SV=3	PF00168//PF08150	C2 domain//FerB (NUC096) domain	--	--	GO:0005515	protein binding	GO:0016021	integral component of membrane	KOG1326	Membrane-associated protein FER-1 and related ferlins, contain multiple C2 domains
c89564_g1	7.88582	61.9549	-2.9739	0.018283	1630	410912363	XP_003969659.1	927	1.21e-118	PREDICTED: high choriolytic enzyme 2-like [Takifugu rubripes]	551513306	XM_005808109.1	94	2.1e-39	PREDICTED: Xiphophorus maculatus low choriolytic enzyme-like (LOC102222971), mRNA	K08778	ASTL	astacin-like metalloendopeptidase	http://www.genome.jp/dbget-bin/www_bget?ko:K08778	P31579	437	7.94e-48	Low choriolytic enzyme OS=Oryzias latipes GN=lce PE=1 SV=1	PF01457//PF00413//PF01400	Leishmanolysin//Matrixin//Astacin (Peptidase family M12A)	GO:0007155//GO:0006508	cell adhesion//proteolysis	GO:0008270//GO:0004222	zinc ion binding//metalloendopeptidase activity	GO:0031012//GO:0016020	extracellular matrix//membrane	KOG3714	Meprin A metalloprotease
c104617_g5	0.972585	17.2395	-4.1478	0.018714	1001	--	--	--	--	--	--	--	--	--	--	--	--	--	--	--	--	--	--	--	--	--	--	--	--	--	--	--	--
c157832_g1	194.885	29.7042	2.7139	0.018765	1040	--	--	--	--	--	--	--	--	--	--	--	--	--	--	--	--	--	--	--	--	--	--	--	--	--	--	--	--
c96181_g1	24.1218	2.13832	3.4958	0.018946	2049	657545155	XP_008277936.1	410	5.68e-43	PREDICTED: complement C1q-like protein 2 [Stegastes partitus]	--	--	--	--	--	--	--	--	--	Q9D8U4	139	8.21e-08	Complement C1q tumor necrosis factor-related protein 2 OS=Mus musculus GN=C1qtnf2 PE=1 SV=1	PF00229	TNF(Tumour Necrosis Factor) family	GO:0006955//GO:0007165	immune response//signal transduction	GO:0005164	tumor necrosis factor receptor binding	GO:0016020	membrane	--	--
c93013_g4	9.12565	71.2241	-2.9644	0.018967	649	294875024	ADF47160.1	119	9.19e-06	cardiac muscle alpha actin 1 [Hemiscyllium ocellatum]	554877409	XM_005948496.1	80	4.92e-32	PREDICTED: Haplochromis burtoni actin, alpha skeletal muscle B-like (LOC102295867), mRNA	--	--	--	--	Q24733	115	5.12e-07	Actin (Fragment) OS=Dictyocaulus viviparus PE=3 SV=1	--	--	--	--	--	--	--	--	KOG0676	Actin and related proteins
c97450_g1	17.3269	120.43	-2.7971	0.01902	2513	657595199	XP_008302246.1	1227	4.05e-156	PREDICTED: solute carrier family 2, facilitated glucose transporter member 9-like [Stegastes partitus]	554848700	XM_005934584.1	375	0	PREDICTED: Haplochromis burtoni solute carrier family 2, facilitated glucose transporter member 9-like (LOC102308518), mRNA	K08143	SLC2A5, GLUT5	MFS transporter, SP family, solute carrier family 2 (facilitated glucose/fructose transporter), member 5	http://www.genome.jp/dbget-bin/www_bget?ko:K08143	Q8WMN1	639	7.04e-72	Solute carrier family 2, facilitated glucose transporter member 5 OS=Ovis aries GN=SLC2A5 PE=2 SV=1	PF01896//PF00083//PF04226//PF07690	Eukaryotic and archaeal DNA primase small subunit//Sugar (and other) transporter//Transglycosylase associated protein//Major Facilitator Superfamily	GO:0055085//GO:0006269//GO:0006351	transmembrane transport//DNA replication, synthesis of RNA primer//transcription, DNA-templated	GO:0022857//GO:0003896	transmembrane transporter activity//DNA primase activity	GO:0005730//GO:0005657//GO:0016021	nucleolus//replication fork//integral component of membrane	KOG0569	Permease of the major facilitator superfamily
c53954_g1	9.21327	73.0065	-2.9862	0.019342	1355	657743420	XP_008306861.1	255	1.39e-20	PREDICTED: cylicin-2-like [Cynoglossus semilaevis]	--	--	--	--	--	--	--	--	--	--	--	--	--	PF09726//PF05793//PF02724	Transmembrane protein//Transcription initiation factor IIF, alpha subunit (TFIIF-alpha)//CDC45-like protein	GO:0006270//GO:0045893	DNA replication initiation//positive regulation of transcription, DNA-templated	GO:0003677	DNA binding	GO:0005634//GO:0016021	nucleus//integral component of membrane	--	--
c92489_g1	1.94517	22.948	-3.5604	0.019616	1254	542244535	XP_005459171.1	931	6.24e-122	PREDICTED: PRELI domain-containing protein 1, mitochondrial-like isoform X2 [Oreochromis niloticus] >gi|542244538|ref|XP_005459172.1| PREDICTED: PRELI domain-containing protein 1, mitochondrial-like isoform X3 [Oreochromis niloticus] >gi|542244540|ref|XP_003454707.2| PREDICTED: PRELI domain-containing protein 1, mitochondrial-like isoform X1 [Oreochromis niloticus] >gi|542244542|ref|XP_005459173.…	542244541	XM_005459116.1	309	4.88e-159	PREDICTED: Oreochromis niloticus PRELI domain-containing protein 1, mitochondrial-like (LOC100699232), transcript variant X4, mRNA	--	--	--	--	Q32KN9	620	2.14e-76	PRELI domain-containing protein 1, mitochondrial OS=Bos taurus GN=PRELID1 PE=2 SV=1	--	--	--	--	--	--	--	--	KOG3337	Protein similar to predicted member of the intramitochondrial sorting protein family
c92189_g1	20.4593	1.42241	3.8464	0.019995	1093	--	--	--	--	--	--	--	--	--	--	--	--	--	--	--	--	--	--	--	--	--	--	--	--	--	--	--	--
c91726_g1	44.1694	385.79	-3.1267	0.020054	2047	657566629	XP_008286663.1	836	1.84e-103	PREDICTED: proenkephalin-A-like [Stegastes partitus]	112421471	BT028208.1	329	6.14e-170	Gasterosteus aculeatus clone CNB158-G02 mRNA sequence	--	--	--	--	P01210	265	6.17e-24	Proenkephalin-A OS=Homo sapiens GN=PENK PE=1 SV=1	PF02198	Sterile alpha motif (SAM)/Pointed domain	--	--	GO:0043565	sequence-specific DNA binding	GO:0005634	nucleus	--	--
c99741_g1	365.425	2261.45	-2.6296	0.020223	2001	657594514	XP_008301874.1	1708	0	PREDICTED: 3-ketoacyl-CoA thiolase, mitochondrial [Stegastes partitus]	225794852	FJ804426.1	1020	0	Perca flavescens acetyl-Coenzyme A acyltransferase mRNA, complete cds	K07508	ACAA2	acetyl-CoA acyltransferase 2	http://www.genome.jp/dbget-bin/www_bget?ko:K07508	P13437	1401	0	3-ketoacyl-CoA thiolase, mitochondrial OS=Rattus norvegicus GN=Acaa2 PE=2 SV=1	PF08541//PF02803//PF00108	3-Oxoacyl-[acyl-carrier-protein (ACP)] synthase III C terminal//Thiolase, C-terminal domain//Thiolase, N-terminal domain	GO:0008610//GO:0008152	lipid biosynthetic process//metabolic process	GO:0016747	transferase activity, transferring acyl groups other than amino-acyl groups	--	--	KOG1391	Acetyl-CoA acetyltransferase
c94045_g1	3.43033	33.2555	-3.2772	0.020297	1105	542199882	XP_005474200.1	292	5.04e-26	PREDICTED: bone morphogenetic protein 3B-like [Oreochromis niloticus]	542199881	XM_005474143.1	343	5.39e-178	PREDICTED: Oreochromis niloticus bone morphogenetic protein 3B-like (LOC100711454), mRNA	K05496	BMP3_3B	bone morphogenetic protein 3/3B	http://www.genome.jp/dbget-bin/www_bget?ko:K05496	P12645	252	2.01e-22	Bone morphogenetic protein 3 OS=Homo sapiens GN=BMP3 PE=1 SV=2	PF00019	Transforming growth factor beta like domain	GO:0007165//GO:0008283//GO:0040007	signal transduction//cell proliferation//growth	GO:0008083	growth factor activity	--	--	KOG3900	Transforming growth factor beta, bone morphogenetic protein and related proteins
c58233_g1	13.0335	0.474136	4.7808	0.02032	455	--	--	--	--	--	--	--	--	--	--	--	--	--	--	--	--	--	--	--	--	--	--	--	--	--	--	--	--
c24484_g1	3100.38	467.009	2.7309	0.020383	529	657577882	XP_008292791.1	721	7.39e-91	PREDICTED: nicotinamide mononucleotide adenylyltransferase 3-like [Stegastes partitus]	542206279	XM_003437997.2	311	1.53e-160	PREDICTED: Oreochromis niloticus nicotinamide mononucleotide adenylyltransferase 3-like (LOC100691765), mRNA	K14622	RBP2, CRBP2	retinol binding protein 2	http://www.genome.jp/dbget-bin/www_bget?ko:K14622	P50121	524	1.45e-66	Retinol-binding protein 2 OS=Sus scrofa GN=RBP2 PE=2 SV=2	--	--	--	--	--	--	--	--	KOG4015	Fatty acid-binding protein FABP
c120047_g1	0	10.1369	#NAME?	0.020585	656	--	--	--	--	--	374428415	FQ310507.3	36	1.43e-07	Dicentrarchus labrax chromosome sequence corresponding to linkage group 1, bottom part, complete sequence	--	--	--	--	--	--	--	--	--	--	--	--	--	--	--	--	--	--
c100802_g1	0	8.46328	#NAME?	0.020992	1306	348539047	XP_003457001.1	782	3.15e-99	PREDICTED: AP-1 complex subunit sigma-3-like [Oreochromis niloticus]	542251408	XM_003456953.2	321	1.09e-165	PREDICTED: Oreochromis niloticus AP-1 complex subunit sigma-3-like (LOC100701959), mRNA	K12395	AP1S3	AP-1 complex subunit sigma-3	http://www.genome.jp/dbget-bin/www_bget?ko:K12395	Q7TN05	593	5.07e-73	AP-1 complex subunit sigma-3 OS=Mus musculus GN=Ap1s3 PE=2 SV=1	--	--	GO:0015031//GO:0006886//GO:0016192	protein transport//intracellular protein transport//vesicle-mediated transport	GO:0008565	protein transporter activity	GO:0030117	membrane coat	KOG0934	Clathrin adaptor complex, small subunit
c73144_g1	0	8.46328	#NAME?	0.020992	784	597779821	XP_007253512.1	694	1.63e-82	PREDICTED: gelsolin-like [Astyanax mexicanus]	--	--	--	--	--	K05768	GSN	gelsolin	http://www.genome.jp/dbget-bin/www_bget?ko:K05768	O93510	571	6.08e-66	Gelsolin OS=Gallus gallus GN=GSN PE=2 SV=1	--	--	--	--	--	--	--	--	KOG0444	Cytoskeletal regulator Flightless-I (contains leucine-rich and gelsolin repeats)
c97112_g3	0	8.38269	#NAME?	0.021157	1078	499020017	XP_004560792.1	1717	0	PREDICTED: equilibrative nucleoside transporter 4-like isoform X1 [Maylandia zebra]	499020016	XM_004560735.1	686	0	PREDICTED: Maylandia zebra equilibrative nucleoside transporter 4-like (LOC101469956), transcript variant X1, mRNA	K03323	SLC29A4, ENT4	solute carrier family 29 (equilibrative nucleoside transporter), member 4	http://www.genome.jp/dbget-bin/www_bget?ko:K03323	A1L272	1336	0	Equilibrative nucleoside transporter 4 OS=Danio rerio GN=slc29a4 PE=2 SV=1	PF01733	Nucleoside transporter	GO:0015858//GO:0006810	nucleoside transport//transport	GO:0005337	nucleoside transmembrane transporter activity	GO:0016021	integral component of membrane	KOG1479	Nucleoside transporter
c96830_g1	46.3642	5.77965	3.004	0.021325	1425	542261402	XP_005465655.1	204	5.12e-15	PREDICTED: nuclear factor 7, ovary-like [Oreochromis niloticus]	--	--	--	--	--	--	--	--	--	P19474	129	1.6e-06	E3 ubiquitin-protein ligase TRIM21 OS=Homo sapiens GN=TRIM21 PE=1 SV=1	PF00622	SPRY domain	--	--	GO:0005515	protein binding	--	--	--	--
c58646_g1	0.972585	15.6653	-4.0096	0.021493	1068	--	--	--	--	--	--	--	--	--	--	--	--	--	--	--	--	--	--	--	--	--	--	--	--	--	--	--	--
c104292_g1	6365.35	1042.41	2.6103	0.021517	2973	531996914	AGT62457.1	3609	0	signal transducer and activator of transcription 1 [Epinephelus malabaricus]	255528974	FJ629185.1	1864	0	Siniperca chuatsi signal transducer and activator of transcription 1 mRNA, complete cds	K11220	STAT1	signal transducer and activator of transcription 1	http://www.genome.jp/dbget-bin/www_bget?ko:K11220	Q764M5	2514	0	Signal transducer and activator of transcription 1 OS=Sus scrofa GN=STAT1 PE=2 SV=1	PF01017//PF05859//PF00017//PF02864//PF02865//PF00965//PF12162	STAT protein, all-alpha domain//Mis12 protein//SH2 domain//STAT protein, DNA binding domain//STAT protein, protein interaction domain//Tissue inhibitor of metalloproteinase//STAT1 TAZ2 binding domain	GO:0007067//GO:0007049//GO:0006355//GO:0007165	mitotic nuclear division//cell cycle//regulation of transcription, DNA-templated//signal transduction	GO:0008191//GO:0005515//GO:0004871//GO:0003700	metalloendopeptidase inhibitor activity//protein binding//signal transducer activity//sequence-specific DNA binding transcription factor activity	GO:0005634//GO:0000775//GO:0005667	nucleus//chromosome, centromeric region//transcription factor complex	KOG3667	STAT protein
c90234_g1	0	9.8051	#NAME?	0.021517	677	--	--	--	--	--	--	--	--	--	--	--	--	--	--	--	--	--	--	--	--	--	--	--	--	--	--	--	--
c95909_g1	15.4036	122.502	-2.9915	0.021635	2127	657549053	XP_008279330.1	783	5.44e-96	PREDICTED: tetraspanin-13 [Stegastes partitus]	542236414	XM_003451215.2	254	3.14e-128	PREDICTED: Oreochromis niloticus tetraspanin-13-like (LOC100706041), mRNA	K17356	TSPAN13_31	tetraspanin-13/31	http://www.genome.jp/dbget-bin/www_bget?ko:K17356	O95857	606	1.17e-71	Tetraspanin-13 OS=Homo sapiens GN=TSPAN13 PE=2 SV=1	PF00335	Tetraspanin family	--	--	--	--	GO:0016021	integral component of membrane	--	--
c58281_g1	64.2914	3.31895	4.2758	0.02185	1629	697038597	XP_009581778.1	577	8.64e-66	PREDICTED: ryanodine receptor 2-like, partial [Fulmarus glacialis]	551518035	XM_005810459.1	274	1.83e-139	PREDICTED: Xiphophorus maculatus ryanodine receptor 2-like (LOC102235428), mRNA	K04962	RYR2	ryanodine receptor 2	http://www.genome.jp/dbget-bin/www_bget?ko:K04962	B0LPN4	605	3.65e-65	Ryanodine receptor 2 OS=Rattus norvegicus GN=Ryr2 PE=1 SV=2	PF02877	Poly(ADP-ribose) polymerase, regulatory domain	GO:0006471	protein ADP-ribosylation	GO:0003950	NAD+ ADP-ribosyltransferase activity	--	--	KOG3533	Inositol 1,4,5-trisphosphate receptor
c93807_g1	626.853	97.7663	2.6807	0.021986	712	--	--	--	--	--	--	--	--	--	--	--	--	--	--	--	--	--	--	--	--	--	--	--	--	--	--	--	--
c188761_g1	8.80583	0	Inf	0.022052	408	--	--	--	--	--	--	--	--	--	--	--	--	--	--	--	--	--	--	--	--	--	--	--	--	--	--	--	--
c158197_g1	8.78831	0	Inf	0.022092	353	--	--	--	--	--	--	--	--	--	--	--	--	--	--	--	--	--	--	--	--	--	--	--	--	--	--	--	--
c97192_g1	22.882	153.249	-2.7436	0.022191	3328	--	--	--	--	--	554869534	XM_005944690.1	60	3.45e-20	PREDICTED: Haplochromis burtoni large neutral amino acids transporter small subunit 4-like (LOC102309172), mRNA	--	--	--	--	--	--	--	--	--	--	--	--	--	--	--	--	--	--
c94606_g1	1.98022	22.4833	-3.5051	0.022269	571	--	--	--	--	--	--	--	--	--	--	--	--	--	--	--	--	--	--	--	--	--	--	--	--	--	--	--	--
c105024_g6	8.70069	0	Inf	0.022295	376	584031104	XP_006810010.1	162	6e-14	PREDICTED: uncharacterized protein LOC102798813, partial [Neolamprologus brichardi]	1127549	U18939.1	78	3.56e-31	Battrachocottus baikalensis orf1 and orf2 genes, complete cds	--	--	--	--	--	--	--	--	--	--	--	--	--	--	--	--	--	--
c99970_g1	1.45011	18.5907	-3.6803	0.022316	2258	657571183	XP_008289151.1	2005	0	PREDICTED: transmembrane protease serine 9-like [Stegastes partitus]	548460870	XM_005747735.1	627	0	PREDICTED: Pundamilia nyererei transmembrane protease serine 9-like (LOC102201776), mRNA	K09628	PRSS27	protease, serine 27	http://www.genome.jp/dbget-bin/www_bget?ko:K09628	Q5K2P9	629	2.87e-68	Polyserase-2 OS=Rattus norvegicus GN=Prss36 PE=2 SV=1	PF00089	Trypsin	GO:0006508	proteolysis	GO:0004252	serine-type endopeptidase activity	--	--	KOG3627	Trypsin
c106821_g2	35.9506	3.95428	3.1845	0.022341	527	542255637	XP_005463439.1	149	6.6e-09	PREDICTED: uncharacterized protein LOC102078422 [Oreochromis niloticus]	499051392	XM_004576149.1	48	2.43e-14	PREDICTED: Maylandia zebra uncharacterized LOC101483485 (LOC101483485), mRNA	--	--	--	--	--	--	--	--	--	--	--	--	--	--	--	--	--	--
c104357_g1	75.7915	487.97	-2.6867	0.022376	3275	325155527	ADY89608.1	1746	0	adipose triglyceride lipase [Larimichthys crocea]	325155526	HQ916211.1	784	0	Larimichthys crocea adipose triglyceride lipase mRNA, complete cds	K16816	PNPLA2, ATGL	patatin-like phospholipase domain-containing protein 2	http://www.genome.jp/dbget-bin/www_bget?ko:K16816	Q8BJ56	1318	1.96e-168	Patatin-like phospholipase domain-containing protein 2 OS=Mus musculus GN=Pnpla2 PE=1 SV=1	PF09026//PF01734//PF10717//PF02480	Centromere protein B dimerisation domain//Patatin-like phospholipase//Occlusion-derived virus envelope protein ODV-E18//Alphaherpesvirus glycoprotein E	GO:0006629//GO:0006355	lipid metabolic process//regulation of transcription, DNA-templated	GO:0003677//GO:0003682	DNA binding//chromatin binding	GO:0000775//GO:0016020//GO:0019031//GO:0000785//GO:0005634	chromosome, centromeric region//membrane//viral envelope//chromatin//nucleus	--	--
c95367_g1	1134.52	187.874	2.5942	0.022504	750	--	--	--	--	--	--	--	--	--	--	--	--	--	--	--	--	--	--	--	--	--	--	--	--	--	--	--	--
c94958_g1	0.47753	11.8628	-4.6347	0.022519	1357	657554965	XP_008281970.1	1405	0	PREDICTED: ral guanine nucleotide dissociation stimulator-like 1 [Stegastes partitus]	542179144	XM_003443160.2	522	0	PREDICTED: Oreochromis niloticus ral guanine nucleotide dissociation stimulator-like 1-like (LOC100707799), mRNA	K17635	RGL1, RGL	ral guanine nucleotide dissociation stimulator-like 1	http://www.genome.jp/dbget-bin/www_bget?ko:K17635	Q9NZL6	591	3.01e-66	Ral guanine nucleotide dissociation stimulator-like 1 OS=Homo sapiens GN=RGL1 PE=2 SV=1	PF00617//PF00618	RasGEF domain//RasGEF N-terminal motif	GO:0051056//GO:0043087//GO:0007264	regulation of small GTPase mediated signal transduction//regulation of GTPase activity//small GTPase mediated signal transduction	GO:0005085	guanyl-nucleotide exchange factor activity	GO:0005622	intracellular	KOG3629	Guanine-nucleotide releasing factor
c104526_g1	2.44022	25.2475	-3.3711	0.022523	1185	657553268	XP_008281041.1	319	7.26e-29	PREDICTED: receptor-type tyrosine-protein phosphatase beta-like [Stegastes partitus] >gi|657553270|ref|XP_008281042.1| PREDICTED: receptor-type tyrosine-protein phosphatase beta-like [Stegastes partitus]	--	--	--	--	--	--	--	--	--	--	--	--	--	PF00041//PF09138	Fibronectin type III domain//Urm1 (Ubiquitin related modifier)	GO:0034227	tRNA thio-modification	GO:0005515	protein binding	GO:0005737	cytoplasm	--	--
c101614_g1	3.37776	31.2595	-3.2102	0.022543	3256	657566272	XP_008286471.1	3209	0	PREDICTED: phosphatidylinositol 4,5-bisphosphate 3-kinase catalytic subunit gamma isoform-like [Stegastes partitus]	548437070	XM_005744667.1	944	0	PREDICTED: Pundamilia nyererei phosphatidylinositol 4,5-bisphosphate 3-kinase catalytic subunit gamma isoform-like (LOC102215291), mRNA	K00922	PIK3C	phosphatidylinositol-4,5-bisphosphate 3-kinase	http://www.genome.jp/dbget-bin/www_bget?ko:K00922	Q9JHG7	1904	0	Phosphatidylinositol 4,5-bisphosphate 3-kinase catalytic subunit gamma isoform OS=Mus musculus GN=Pik3cg PE=1 SV=2	PF00454	Phosphatidylinositol 3- and 4-kinase	--	--	GO:0016773	phosphotransferase activity, alcohol group as acceptor	--	--	KOG0905	Phosphoinositide 3-kinase
c105811_g1	69.6055	9.33096	2.8991	0.023145	819	--	--	--	--	--	--	--	--	--	--	--	--	--	--	--	--	--	--	--	--	--	--	--	--	--	--	--	--
c96303_g1	4.82787	39.8034	-3.0434	0.023198	748	617468332	XP_007574500.1	384	6.4e-43	PREDICTED: galactose-specific lectin nattectin-like, partial [Poecilia formosa]	--	--	--	--	--	K06794	NCAN, CSPG3	neurocan core protein	http://www.genome.jp/dbget-bin/www_bget?ko:K06794	Q66S03	343	4.18e-38	Galactose-specific lectin nattectin OS=Thalassophryne nattereri PE=1 SV=1	PF00059	Lectin C-type domain	--	--	GO:0030246	carbohydrate binding	--	--	KOG4297	C-type lectin
c99919_g1	249.174	22.9574	3.4401	0.023233	3090	657552070	XP_008280414.1	1205	4.8e-152	PREDICTED: stimulator of interferon genes protein [Stegastes partitus]	548333361	XM_005719476.1	443	0	PREDICTED: Pundamilia nyererei stimulator of interferon genes protein-like (LOC102192627), mRNA	K12654	TMEM173, MITA	transmembrane protein 173	http://www.genome.jp/dbget-bin/www_bget?ko:K12654	Q3TBT3	525	4.67e-57	Stimulator of interferon genes protein OS=Mus musculus GN=Tmem173 PE=1 SV=2	PF00404//PF03603	Dockerin type I repeat//DNA polymerase III psi subunit	GO:0005975//GO:0006260	carbohydrate metabolic process//DNA replication	GO:0004553//GO:0008408//GO:0003887	hydrolase activity, hydrolyzing O-glycosyl compounds//3'-5' exonuclease activity//DNA-directed DNA polymerase activity	GO:0042575	DNA polymerase complex	--	--
c44482_g1	27.9596	2.61246	3.4199	0.023288	1267	--	--	--	--	--	--	--	--	--	--	--	--	--	--	--	--	--	--	PF01654	Bacterial Cytochrome Ubiquinol Oxidase	--	--	--	--	GO:0016020	membrane	--	--
c186781_g1	0.495054	13.3041	-4.7481	0.023446	961	657584146	XP_008296212.1	154	9.87e-09	PREDICTED: tyrosine-protein phosphatase non-receptor type substrate 1-like [Stegastes partitus]	--	--	--	--	--	--	--	--	--	--	--	--	--	PF05778	Apolipoprotein CIII (Apo-CIII)	GO:0042157//GO:0006869	lipoprotein metabolic process//lipid transport	GO:0008289	lipid binding	GO:0005576	extracellular region	--	--
c101963_g1	9420.72	1619.68	2.5401	0.023453	1252	583993053	XP_006791694.1	1150	1.53e-149	PREDICTED: galectin-3-binding protein A-like [Neolamprologus brichardi]	112420825	BT027642.1	292	1.37e-149	Gasterosteus aculeatus clone CGX73-F01 mRNA sequence	K17300	LGALS3BP	galectin-3-binding protein	http://www.genome.jp/dbget-bin/www_bget?ko:K17300	Q6NY73	720	6.99e-87	Galectin-3-binding protein B OS=Danio rerio GN=lgals3bpb PE=2 SV=1	--	--	--	--	--	--	--	--	--	--
c95551_g1	25.8173	2.61246	3.3049	0.02362	1446	657540257	XP_008276191.1	579	4.93e-64	PREDICTED: meiotic recombination protein REC8 homolog [Stegastes partitus]	374428416	FQ310508.3	109	8.54e-48	Dicentrarchus labrax chromosome sequence corresponding to linkage group 18, complete sequence	K13054	REC8L	meiotic recombination protein REC8, animal type	http://www.genome.jp/dbget-bin/www_bget?ko:K13054	--	--	--	--	PF04824	Conserved region of Rad21 / Rec8 like protein	--	--	--	--	GO:0000228	nuclear chromosome	--	--
c87400_g1	72.5189	10.2081	2.8286	0.023719	1487	--	--	--	--	--	--	--	--	--	--	--	--	--	--	--	--	--	--	--	--	--	--	--	--	--	--	--	--
c84197_g1	0	8.4727	#NAME?	0.02375	353	--	--	--	--	--	--	--	--	--	--	--	--	--	--	--	--	--	--	--	--	--	--	--	--	--	--	--	--
c79092_g1	0.972585	18.1878	-4.225	0.023913	651	617471838	XP_007575663.1	401	2.1e-46	PREDICTED: peptide YY-A-like [Poecilia formosa]	542179601	XM_003446396.2	286	1.51e-146	PREDICTED: Oreochromis niloticus peptide YY-like (LOC100702181), mRNA	K05233	PYY	peptide YY	http://www.genome.jp/dbget-bin/www_bget?ko:K05233	Q9I8P2	361	5.18e-42	Peptide YY-A OS=Danio rerio GN=pyya PE=2 SV=1	PF00159	Pancreatic hormone peptide	GO:0007165	signal transduction	GO:0005179	hormone activity	GO:0005576	extracellular region	--	--
c89803_g1	0.972585	14.7882	-3.9265	0.023992	3335	657547585	XP_008278821.1	1519	0	PREDICTED: uncharacterized protein LOC103356456 [Stegastes partitus]	--	--	--	--	--	--	--	--	--	Q80XF5	144	1.76e-08	Interleukin-22 receptor subunit alpha-2 OS=Mus musculus GN=Il22ra2 PE=1 SV=2	--	--	--	--	--	--	--	--	--	--
c87485_g1	57.3343	365.085	-2.6708	0.02421	2713	542239583	XP_003452559.2	2187	0	PREDICTED: zinc transporter ZIP4-like [Oreochromis niloticus]	542239582	XM_003452511.2	751	0	PREDICTED: Oreochromis niloticus zinc transporter ZIP4-like (LOC100692554), mRNA	K14710	SLC39A4, ZIP4	solute carrier family 39 (zinc transporter), member 4	http://www.genome.jp/dbget-bin/www_bget?ko:K14710	Q1KZG0	992	2.95e-120	Zinc transporter ZIP4 OS=Bos taurus GN=SLC39A4 PE=1 SV=1	PF02535	ZIP Zinc transporter	GO:0055085//GO:0030001	transmembrane transport//metal ion transport	GO:0046873	metal ion transmembrane transporter activity	GO:0016020	membrane	KOG2693	Putative zinc transporter
c94995_g1	34.9079	4.11546	3.0844	0.024211	553	--	--	--	--	--	374428415	FQ310507.3	135	1.11e-62	Dicentrarchus labrax chromosome sequence corresponding to linkage group 1, bottom part, complete sequence	--	--	--	--	--	--	--	--	PF04277	Oxaloacetate decarboxylase, gamma chain	GO:0006525//GO:0071436//GO:0006560//GO:0006814//GO:0006090	arginine metabolic process//sodium ion export//proline metabolic process//sodium ion transport//pyruvate metabolic process	GO:0008948//GO:0015081	oxaloacetate decarboxylase activity//sodium ion transmembrane transporter activity	GO:0016020	membrane	--	--
c98416_g1	23.9116	796.65	-5.0582	0.02466	3458	584013111	XP_006801378.1	3232	0	PREDICTED: cadherin-17-like [Neolamprologus brichardi]	542196155	XM_003450934.2	1036	0	PREDICTED: Oreochromis niloticus cadherin-17-like (LOC100694520), transcript variant X1, mRNA	K06811	CDH17	cadherin 17, LI cadherin	http://www.genome.jp/dbget-bin/www_bget?ko:K06811	Q12864	1245	1.8e-152	Cadherin-17 OS=Homo sapiens GN=CDH17 PE=1 SV=3	PF00918//PF00028	Gastrin/cholecystokinin family//Cadherin domain	GO:0007165//GO:0007156	signal transduction//homophilic cell adhesion	GO:0005509//GO:0005179	calcium ion binding//hormone activity	GO:0005576//GO:0016020	extracellular region//membrane	KOG3594	FOG: Cadherin repeats
c94779_g1	3.36024	37.6933	-3.4877	0.024881	2571	657539148	XP_008275791.1	742	9.24e-86	PREDICTED: pleckstrin homology domain-containing family S member 1 isoform X2 [Stegastes partitus]	374428415	FQ310507.3	142	6.93e-66	Dicentrarchus labrax chromosome sequence corresponding to linkage group 1, bottom part, complete sequence	--	--	--	--	Q5SXH7	188	2.42e-13	Pleckstrin homology domain-containing family S member 1 OS=Homo sapiens GN=PLEKHS1 PE=2 SV=2	PF13180	PDZ domain	--	--	GO:0005515	protein binding	--	--	--	--
c100199_g1	0.47753	11.7917	-4.626	0.024908	3584	499006937	XP_004556350.1	1136	0	PREDICTED: cadherin-related family member 5-like [Maylandia zebra]	--	--	--	--	--	K16505	CDHR5, MUCDHL	cadherin-related family member 5	http://www.genome.jp/dbget-bin/www_bget?ko:K16505	Q9HBB8	258	3.21e-28	Cadherin-related family member 5 OS=Homo sapiens GN=CDHR5 PE=1 SV=3	PF00028	Cadherin domain	GO:0007156	homophilic cell adhesion	GO:0005509	calcium ion binding	GO:0016020	membrane	KOG3594	FOG: Cadherin repeats
c98525_g1	52.7342	7.60502	2.7937	0.024934	1392	--	--	--	--	--	--	--	--	--	--	--	--	--	--	--	--	--	--	--	--	--	--	--	--	--	--	--	--
c139919_g1	0	10.2792	#NAME?	0.024978	1113	381141859	AFF57871.1	396	3.84e-40	Sox8a [Epinephelus coioides] >gi|381141863|gb|AFF57873.1| Sox8a [Epinephelus coioides]	542233390	XM_003450115.2	533	0	PREDICTED: Oreochromis niloticus transcription factor Sox-8-like (LOC100698682), mRNA	K09270	SOX7S	transcription factor SOX7/8/10/18 (SOX group E/F)	http://www.genome.jp/dbget-bin/www_bget?ko:K09270	Q6IZ48	342	2.75e-34	Transcription factor Sox-8 OS=Tetraodon nigroviridis GN=sox8 PE=2 SV=2	--	--	--	--	--	--	--	--	--	--
c106897_g1	56.1427	7.83738	2.8407	0.025073	740	548550296	XP_005755000.1	254	9.05e-22	PREDICTED: Fc receptor-like protein 5-like, partial [Pundamilia nyererei]	551530697	XM_005816747.1	49	9.66e-15	PREDICTED: Xiphophorus maculatus Fc receptor-like protein 5-like (LOC102222421), partial mRNA	--	--	--	--	--	--	--	--	--	--	--	--	--	--	--	--	--	--
c10394_g1	12.2186	0.474136	4.6876	0.025182	1026	--	--	--	--	--	--	--	--	--	--	--	--	--	--	--	--	--	--	PF04996	Succinylarginine dihydrolase	GO:0006525	arginine metabolic process	GO:0009015	N-succinylarginine dihydrolase activity	--	--	--	--
c3426_g1	15.649	1.02887	3.9269	0.025245	1305	--	--	--	--	--	--	--	--	--	--	--	--	--	--	--	--	--	--	--	--	--	--	--	--	--	--	--	--
c171794_g1	12.1661	0.474136	4.6814	0.025264	820	47218417	CAG12688.1	161	1.1e-09	unnamed protein product, partial [Tetraodon nigroviridis]	542250550	XM_005461398.1	623	0	PREDICTED: Oreochromis niloticus collagen alpha-1(XI) chain-like (LOC100705537), transcript variant X5, mRNA	--	--	--	--	Q61245	129	6.84e-07	Collagen alpha-1(XI) chain OS=Mus musculus GN=Col11a1 PE=1 SV=2	PF01584	CheW-like domain	GO:0007165//GO:0006935	signal transduction//chemotaxis	GO:0004871	signal transducer activity	GO:0005622	intracellular	KOG3544	Collagens (type IV and type XIII), and related proteins
c90430_g1	262.9	44.1795	2.5731	0.025299	856	--	--	--	--	--	--	--	--	--	--	--	--	--	--	--	--	--	--	--	--	--	--	--	--	--	--	--	--
c15572_g1	15.5614	1.02887	3.9188	0.025337	749	542236124	XP_005456019.1	185	1.11e-13	PREDICTED: nesprin-1-like [Oreochromis niloticus]	548353008	XM_005728702.1	94	9.44e-40	PREDICTED: Pundamilia nyererei nesprin-2-like (LOC102215623), mRNA	--	--	--	--	--	--	--	--	--	--	--	--	--	--	--	--	--	--
c92581_g1	58.1974	8.5533	2.7664	0.025869	331	--	--	--	--	--	--	--	--	--	--	--	--	--	--	--	--	--	--	--	--	--	--	--	--	--	--	--	--
c106593_g1	76.7597	467.061	-2.6052	0.025903	5004	542198694	XP_005473739.1	1076	2.71e-131	PREDICTED: protein BEAN1-like isoform X1 [Oreochromis niloticus] >gi|542198696|ref|XP_005473740.1| PREDICTED: protein BEAN1-like isoform X2 [Oreochromis niloticus]	542198693	XM_005473682.1	565	0	PREDICTED: Oreochromis niloticus protein BEAN1-like (LOC102082850), transcript variant X1, mRNA	--	--	--	--	Q3B7T3	233	3.75e-19	Protein BEAN1 OS=Homo sapiens GN=BEAN1 PE=2 SV=2	PF01141//PF00412	Gag polyprotein, inner coat protein p12//LIM domain	--	--	GO:0008270	zinc ion binding	GO:0019028	viral capsid	--	--
c376_g1	8.29326	0	Inf	0.025948	602	--	--	--	--	--	--	--	--	--	--	--	--	--	--	--	--	--	--	--	--	--	--	--	--	--	--	--	--
c139044_g1	8.27573	0	Inf	0.025997	589	--	--	--	--	--	--	--	--	--	--	--	--	--	--	--	--	--	--	--	--	--	--	--	--	--	--	--	--
c49919_g1	8.18811	0	Inf	0.026246	863	--	--	--	--	--	--	--	--	--	--	--	--	--	--	--	--	--	--	PF01534	Frizzled/Smoothened family membrane region	GO:0007166	cell surface receptor signaling pathway	--	--	GO:0016020	membrane	--	--
c103937_g3	11.671	75.5342	-2.6942	0.026437	1839	--	--	--	--	--	397776253	JQ745298.1	49	2.47e-14	Oplegnathus fasciatus p53 apoptosis effector (PERP) gene, complete cds	--	--	--	--	--	--	--	--	--	--	--	--	--	--	--	--	--	--
c99927_g2	1.96269	102.541	-5.7072	0.026489	5755	657584438	XP_008296369.1	7428	0	PREDICTED: ATP-binding cassette sub-family A member 12 [Stegastes partitus]	542225723	XM_003445347.2	2685	0	PREDICTED: Oreochromis niloticus ATP-binding cassette sub-family A member 12-like (LOC100709062), mRNA	K05646	ABCA12	ATP-binding cassette, subfamily A (ABC1), member 12	http://www.genome.jp/dbget-bin/www_bget?ko:K05646	Q86UK0	4572	0	ATP-binding cassette sub-family A member 12 OS=Homo sapiens GN=ABCA12 PE=1 SV=3	PF06414//PF01078//PF00005//PF09085//PF00448	Zeta toxin//Magnesium chelatase, subunit ChlI//ABC transporter//Adhesion molecule, immunoglobulin-like//SRP54-type protein, GTPase domain	GO:0015979//GO:0007155//GO:0006614//GO:0015995//GO:0015994	photosynthesis//cell adhesion//SRP-dependent cotranslational protein targeting to membrane//chlorophyll biosynthetic process//chlorophyll metabolic process	GO:0016851//GO:0005525//GO:0005524//GO:0016301//GO:0016887	magnesium chelatase activity//GTP binding//ATP binding//kinase activity//ATPase activity	GO:0010007//GO:0016020	magnesium chelatase complex//membrane	KOG0059	Lipid exporter ABCA1 and related proteins, ABC superfamily
c53255_g1	18.5492	1.66419	3.4785	0.026631	841	--	--	--	--	--	--	--	--	--	--	--	--	--	--	--	--	--	--	--	--	--	--	--	--	--	--	--	--
c108188_g1	73.7675	1.42241	5.6966	0.026809	737	--	--	--	--	--	--	--	--	--	--	--	--	--	--	--	--	--	--	--	--	--	--	--	--	--	--	--	--
c106713_g3	122.195	20.3544	2.5858	0.026834	1916	658924216	XP_008401796.1	1771	0	PREDICTED: syntaxin-binding protein 5-like [Poecilia reticulata]	554830779	XM_005925898.1	834	0	PREDICTED: Haplochromis burtoni syntaxin-binding protein 5-like (LOC102297586), transcript variant X14, mRNA	K08518	STXBP5	syntaxin-binding protein 5	http://www.genome.jp/dbget-bin/www_bget?ko:K08518	Q5SQE2	1586	0	Syntaxin-binding protein 5-like OS=Danio rerio GN=stxbp5l PE=3 SV=1	PF00957	Synaptobrevin	GO:0016192	vesicle-mediated transport	--	--	GO:0016021	integral component of membrane	KOG1983	Tomosyn and related SNARE-interacting proteins
c93899_g1	18.9742	121.596	-2.68	0.026863	1836	498976753	XP_004548947.1	1327	3.72e-172	PREDICTED: ribonuclease ZC3H12A-like [Maylandia zebra]	498976752	XM_004548890.1	377	0	PREDICTED: Maylandia zebra ribonuclease ZC3H12A-like (LOC101474749), mRNA	--	--	--	--	Q5D1E7	532	1.17e-57	Ribonuclease ZC3H12A OS=Mus musculus GN=Zc3h12a PE=1 SV=2	PF00642	Zinc finger C-x8-C-x5-C-x3-H type (and similar)	--	--	GO:0046872	metal ion binding	--	--	KOG3777	Uncharacterized conserved protein
c94874_g1	3.96044	31.966	-3.0128	0.027022	1034	--	--	--	--	--	315271078	HM800730.1	34	2.98e-06	Notothenia coriiceps isolate KGI0101 type-IV antifreeze protein (AFPIV) gene, complete cds	--	--	--	--	--	--	--	--	--	--	--	--	--	--	--	--	--	--
c90095_g1	2.44022	23.3415	-3.2578	0.027284	2026	542261137	XP_005465555.1	2192	0	PREDICTED: L-amino-acid oxidase-like isoform X1 [Oreochromis niloticus] >gi|542261139|ref|XP_005465556.1| PREDICTED: L-amino-acid oxidase-like isoform X2 [Oreochromis niloticus]	119943472	AB218876.1	821	0	Sebastes schlegeli lao mRNA for skin mucus antibacterial l-amino acid oxidase, complete cds	K03334	IL4I1	L-amino-acid oxidase	http://www.genome.jp/dbget-bin/www_bget?ko:K03334	P86810	2050	0	L-amino-acid oxidase OS=Siganus canaliculatus PE=1 SV=2	PF02254//PF02558//PF13241//PF06100//PF02737//PF01266//PF01134//PF05834//PF01210//PF01349//PF07992//PF00070//PF01593	TrkA-N domain//Ketopantoate reductase PanE/ApbA//Putative NAD(P)-binding//Streptococcal 67 kDa myosin-cross-reactive antigen like family//3-hydroxyacyl-CoA dehydrogenase, NAD binding domain//FAD dependent oxidoreductase//Glucose inhibited division protein A//Lycopene cyclase protein//NAD-dependent glycerol-3-phosphate dehydrogenase N-terminus//Flavivirus non-structural protein NS4B//Pyridine nucl…	GO:0006631//GO:0006550//GO:0006144//GO:0055114//GO:0016117//GO:0006552//GO:0006574//GO:0018874//GO:0046168//GO:0006779//GO:0006813//GO:0006568//GO:0006633//GO:0006396//GO:0006554//GO:0008033//GO:0015940//GO:0009451//GO:0019354//GO:0006370	fatty acid metabolic process//isoleucine catabolic process//purine nucleobase metabolic process//oxidation-reduction process//carotenoid biosynthetic process//leucine catabolic process//valine catabolic process//benzoate metabolic process//glycerol-3-phosphate catabolic process//porphyrin-containing compound biosynthetic process//potassium ion transport//tryptophan metabolic process//fatty acid b…	GO:0050660//GO:0016491//GO:0008677//GO:0016705//GO:0004482//GO:0003968//GO:0050151//GO:0003857//GO:0017111//GO:0016817//GO:0004252//GO:0070008//GO:0016616//GO:0043115//GO:0004483//GO:0051287	flavin adenine dinucleotide binding//oxidoreductase activity//2-dehydropantoate 2-reductase activity//oxidoreductase activity, acting on paired donors, with incorporation or reduction of molecular oxygen//mRNA (guanine-N7-)-methyltransferase activity//RNA-directed RNA polymerase activity//oleate hydratase activity//3-hydroxyacyl-CoA dehydrogenase activity//nucleoside-triphosphatase activity//hydr…	GO:0031379//GO:0005737	RNA-directed RNA polymerase complex//cytoplasm	KOG0029	Amine oxidase
c76941_g1	179.876	29.1924	2.6233	0.027519	899	--	--	--	--	--	554836986	XM_005928907.1	221	2.88e-110	PREDICTED: Haplochromis burtoni dedicator of cytokinesis protein 3-like (LOC102311077), mRNA	--	--	--	--	--	--	--	--	--	--	--	--	--	--	--	--	--	--
c97779_g1	15.0838	1.02887	3.8739	0.027754	402	--	--	--	--	--	--	--	--	--	--	--	--	--	--	--	--	--	--	--	--	--	--	--	--	--	--	--	--
c100489_g2	68.4884	10.5304	2.7013	0.027887	662	--	--	--	--	--	--	--	--	--	--	--	--	--	--	--	--	--	--	--	--	--	--	--	--	--	--	--	--
c10521_g1	20.4068	126.873	-2.6363	0.027953	1172	425895519	AFY10067.1	1349	0	inositol monophosphatase 1 [Oreochromis mossambicus]	425895518	JQ943581.1	551	0	Oreochromis mossambicus inositol monophosphatase 1 (impa1) mRNA, complete cds	K01092	E3.1.3.25, IMPA, suhB	myo-inositol-1(or 4)-monophosphatase	http://www.genome.jp/dbget-bin/www_bget?ko:K01092	P20456	932	7.69e-123	Inositol monophosphatase 1 OS=Bos taurus GN=IMPA1 PE=1 SV=1	PF00459	Inositol monophosphatase family	GO:0046854	phosphatidylinositol phosphorylation	--	--	--	--	KOG2951	Inositol monophosphatase
c76720_g1	6.75552	47.8637	-2.8248	0.028017	2423	657539637	XP_008275965.1	815	1.23e-98	PREDICTED: homeobox protein CDX-1 [Stegastes partitus]	542174795	XM_003455219.2	296	1.61e-151	PREDICTED: Oreochromis niloticus homeobox protein CDX-1-like (LOC100695871), mRNA	K09312	CDX	homeobox protein CDX	http://www.genome.jp/dbget-bin/www_bget?ko:K09312	P46692	413	7.96e-44	Homeobox protein CHOX-CAD OS=Gallus gallus GN=CHOX-CAD1 PE=2 SV=1	PF00046//PF04731	Homeobox domain//Caudal like protein activation region	GO:0006355//GO:0007275	regulation of transcription, DNA-templated//multicellular organismal development	GO:0003700//GO:0043565	sequence-specific DNA binding transcription factor activity//sequence-specific DNA binding	GO:0005667//GO:0005634	transcription factor complex//nucleus	KOG0848	Transcription factor Caudal, contains HOX domain
c110400_g1	0	10.7534	#NAME?	0.028294	618	--	--	--	--	--	--	--	--	--	--	--	--	--	--	--	--	--	--	--	--	--	--	--	--	--	--	--	--
c94733_g1	30.2903	3.80251	2.9938	0.028364	1391	657737681	XP_008324733.1	1140	1.6e-152	PREDICTED: Kv channel-interacting protein 4 [Cynoglossus semilaevis]	542177189	XM_005468198.1	642	0	PREDICTED: Oreochromis niloticus Kv channel-interacting protein 4-like (LOC100711851), transcript variant X7, mRNA	--	--	--	--	Q8HYN7	965	4.57e-127	Kv channel-interacting protein 4 OS=Macaca fascicularis GN=KCNIP4 PE=2 SV=1	PF00036//PF13405//PF13202//PF10591//PF13499	EF hand//EF-hand domain//EF hand//Secreted protein acidic and rich in cysteine Ca binding region//EF-hand domain pair	GO:0007165	signal transduction	GO:0005509	calcium ion binding	GO:0005578	proteinaceous extracellular matrix	KOG0044	Ca2+ sensor (EF-Hand superfamily)
c82286_g1	0.972585	374.196	-8.5878	0.028472	1182	542228730	XP_005453194.1	179	4.73e-13	PREDICTED: growth-regulated alpha protein-like isoform X1 [Oreochromis niloticus]	--	--	--	--	--	--	--	--	--	--	--	--	--	PF00570//PF03526//PF00048	HRDC domain//Colicin E1 (microcin) immunity protein//Small cytokines (intecrine/chemokine), interleukin-8 like	GO:0006935//GO:0030153//GO:0007165//GO:0006955	chemotaxis//bacteriocin immunity//signal transduction//immune response	GO:0015643//GO:0008009//GO:0003676	toxic substance binding//chemokine activity//nucleic acid binding	GO:0019814//GO:0005622//GO:0005576	immunoglobulin complex//intracellular//extracellular region	--	--
c62200_g1	0	11.2463	#NAME?	0.028628	856	657810747	XP_008332698.1	1043	3.46e-137	PREDICTED: pituitary adenylate cyclase-activating polypeptide type I receptor-like isoform X2 [Cynoglossus semilaevis]	57283054	AJ514930.1	454	0	Sparus aurata mRNA for pituitary adenylate cyclase activating polypeptide receptor 1A (pacap1A gene)	K04587	ADCYAP1R1, PACAPRI	pituitary adenylate cyclase-activating polypeptide type I receptor	http://www.genome.jp/dbget-bin/www_bget?ko:K04587	P41586	635	2.89e-77	Pituitary adenylate cyclase-activating polypeptide type I receptor OS=Homo sapiens GN=ADCYAP1R1 PE=1 SV=1	PF02793//PF00002	Hormone receptor domain//7 transmembrane receptor (Secretin family)	GO:0007186	G-protein coupled receptor signaling pathway	GO:0004930	G-protein coupled receptor activity	GO:0016021//GO:0016020	integral component of membrane//membrane	KOG4564	Adenylate cyclase-coupled calcitonin receptor
c122277_g1	582932	106668	2.4502	0.028671	917	208970877	ACI32416.1	483	1.61e-56	antifreeze protein [Siniperca chuatsi]	76262398	DQ062446.1	44	7.27e-12	Clupea harengus clone 12 type II antifreeze protein (AFPII) mRNA, complete cds	--	--	--	--	Q01758	385	1.83e-43	Type-2 ice-structuring protein OS=Osmerus mordax PE=1 SV=1	PF00059	Lectin C-type domain	--	--	GO:0030246	carbohydrate binding	--	--	KOG4297	C-type lectin
c100569_g1	0	7.75679	#NAME?	0.028943	1108	--	--	--	--	--	--	--	--	--	--	--	--	--	--	--	--	--	--	PF13965//PF14073//PF01496//PF06009	dsRNA-gated channel SID-1//Centrosome localisation domain of Cep57//V-type ATPase 116kDa subunit family//Laminin Domain II	GO:0015931//GO:0007155//GO:0015992//GO:0033227//GO:0015991	nucleobase-containing compound transport//cell adhesion//proton transport//dsRNA transport//ATP hydrolysis coupled proton transport	GO:0042802//GO:0015078//GO:0051033//GO:0043015	identical protein binding//hydrogen ion transmembrane transporter activity//RNA transmembrane transporter activity//gamma-tubulin binding	GO:0016021//GO:0033179//GO:0005604//GO:0045298	integral component of membrane//proton-transporting V-type ATPase, V0 domain//basement membrane//tubulin complex	--	--
c70621_g1	0	7.5956	#NAME?	0.029421	395	--	--	--	--	--	--	--	--	--	--	--	--	--	--	--	--	--	--	--	--	--	--	--	--	--	--	--	--
c70599_g1	1.43259	33.7631	-4.5587	0.029583	2614	657595459	XP_008302391.1	1202	2.22e-146	PREDICTED: aminopeptidase N-like [Stegastes partitus]	542231640	XM_005454259.1	336	1.01e-173	PREDICTED: Oreochromis niloticus aminopeptidase N-like (LOC100707734), mRNA	K11140	ANPEP	aminopeptidase N	http://www.genome.jp/dbget-bin/www_bget?ko:K11140	P97449	725	5.92e-80	Aminopeptidase N OS=Mus musculus GN=Anpep PE=1 SV=4	PF01433	Peptidase family M1	--	--	GO:0008237//GO:0008270	metallopeptidase activity//zinc ion binding	--	--	KOG1046	Puromycin-sensitive aminopeptidase and related aminopeptidases
c96724_g1	29.4273	3.64133	3.0146	0.029955	1535	542190488	XP_005470879.1	672	1.57e-78	PREDICTED: uncharacterized protein LOC102078212 [Oreochromis niloticus]	--	--	--	--	--	--	--	--	--	--	--	--	--	PF15360	APJ endogenous ligand	GO:0007165	signal transduction	GO:0031704//GO:0005179	apelin receptor binding//hormone activity	--	--	--	--
c102898_g2	1.91012	19.7808	-3.3724	0.03003	2360	542224381	XP_003444509.2	1289	2.4e-168	PREDICTED: annexin A3-like isoform X1 [Oreochromis niloticus]	554822727	XM_005921990.1	543	0	PREDICTED: Haplochromis burtoni annexin A3-like (LOC102309805), mRNA	K17089	ANXA3	annexin A3	http://www.genome.jp/dbget-bin/www_bget?ko:K17089	P12429	853	2.43e-105	Annexin A3 OS=Homo sapiens GN=ANXA3 PE=1 SV=3	PF00191	Annexin	--	--	GO:0005544//GO:0005509	calcium-dependent phospholipid binding//calcium ion binding	--	--	KOG0819	Annexin
c98301_g1	426.973	2389.94	-2.4848	0.030173	5771	617387749	XP_007548490.1	3950	0	PREDICTED: uncharacterized protein LOC103135614 [Poecilia formosa]	542176348	XM_003445948.2	1300	0	PREDICTED: Oreochromis niloticus uncharacterized LOC100691901 (LOC100691901), mRNA	--	--	--	--	P54987	1323	8.38e-163	Cis-aconitate decarboxylase OS=Mus musculus GN=Irg1 PE=1 SV=2	PF03972//PF01184//PF01300	MmgE/PrpD family//GPR1/FUN34/yaaH family//Telomere recombination	GO:0019543	propionate catabolic process	GO:0003725//GO:0047547	double-stranded RNA binding//2-methylcitrate dehydratase activity	GO:0016020	membrane	KOG3051	RNA binding/translational regulation protein of the SUA5 family
c83844_g1	8.34583	0	Inf	0.030351	584	--	--	--	--	--	--	--	--	--	--	--	--	--	--	--	--	--	--	--	--	--	--	--	--	--	--	--	--
c109125_g1	1.45011	17.5001	-3.5931	0.030462	734	--	--	--	--	--	548344871	XM_005724796.1	301	7.86e-155	PREDICTED: Pundamilia nyererei zinc finger protein 395-like (LOC102211454), transcript variant X2, mRNA	--	--	--	--	--	--	--	--	--	--	--	--	--	--	--	--	--	--
c85158_g1	7.85077	0	Inf	0.030468	360	--	--	--	--	--	--	--	--	--	--	--	--	--	--	--	--	--	--	--	--	--	--	--	--	--	--	--	--
c88262_g1	46.5439	6.40555	2.8612	0.030513	2235	--	--	--	--	--	--	--	--	--	--	--	--	--	--	--	--	--	--	--	--	--	--	--	--	--	--	--	--
c95676_g1	7.74563	0	Inf	0.030832	1872	--	--	--	--	--	542218599	XM_003439401.2	320	5.64e-165	PREDICTED: Oreochromis niloticus protein NDRG4-B-like (LOC100709672), transcript variant X1, mRNA	--	--	--	--	--	--	--	--	--	--	--	--	--	--	--	--	--	--
c25343_g1	13.9886	84.391	-2.5928	0.030971	753	657546485	XP_008278422.1	331	1.41e-32	PREDICTED: UDP-GlcNAc:betaGal beta-1,3-N-acetylglucosaminyltransferase 7-like [Stegastes partitus]	112421954	BT028691.1	177	6.89e-86	Gasterosteus aculeatus clone CNB282-C04 mRNA sequence	K09664	B3GNT7	beta-1,3-N-acetylglucosaminyltransferase 7	http://www.genome.jp/dbget-bin/www_bget?ko:K09664	Q8NFL0	183	2.85e-14	UDP-GlcNAc:betaGal beta-1,3-N-acetylglucosaminyltransferase 7 OS=Homo sapiens GN=B3GNT7 PE=2 SV=1	--	--	--	--	--	--	--	--	--	--
c91942_g2	0	26.6416	#NAME?	0.030985	409	156740001	ABU93585.1	251	7.11e-23	gastric chitinase [Morone saxatilis]	156740000	EU048546.1	229	4.47e-115	Morone saxatilis gastric chitinase mRNA, complete cds	K01183	E3.2.1.14	chitinase	http://www.genome.jp/dbget-bin/www_bget?ko:K01183	Q6RY07	167	6.27e-13	Acidic mammalian chitinase OS=Rattus norvegicus GN=Chia PE=2 SV=1	PF01607//PF10099//PF13994	Chitin binding Peritrophin-A domain//Anti-sigma-K factor rskA//PgaD-like protein	GO:0042710//GO:0006030	biofilm formation//chitin metabolic process	GO:0008061	chitin binding	GO:0005886//GO:0005576//GO:0016021	plasma membrane//extracellular region//integral component of membrane	--	--
c88192_g2	1006.65	180.63	2.4785	0.030993	3618	657561840	XP_008284488.1	3302	0	PREDICTED: LOW QUALITY PROTEIN: LON peptidase N-terminal domain and RING finger protein 1-like [Stegastes partitus]	542243576	XM_005458750.1	1132	0	PREDICTED: Oreochromis niloticus LON peptidase N-terminal domain and ring finger 1 (lonrf1), transcript variant X1, mRNA	--	--	--	--	Q17RB8	1695	0	LON peptidase N-terminal domain and RING finger protein 1 OS=Homo sapiens GN=LONRF1 PE=2 SV=2	PF00097//PF02190//PF14634//PF13639//PF13181//PF12678//PF04564//PF00515	Zinc finger, C3HC4 type (RING finger)//ATP-dependent protease La (LON) domain//zinc-RING finger domain//Ring finger domain//Tetratricopeptide repeat//RING-H2 zinc finger//U-box domain//Tetratricopeptide repeat	GO:0016567//GO:0006510//GO:0006508	protein ubiquitination//ATP-dependent proteolysis//proteolysis	GO:0046872//GO:0004176//GO:0004842//GO:0005515//GO:0008270	metal ion binding//ATP-dependent peptidase activity//ubiquitin-protein transferase activity//protein binding//zinc ion binding	GO:0000151	ubiquitin ligase complex	KOG4159	Predicted E3 ubiquitin ligase
c91642_g1	152.35	25.3898	2.5851	0.030999	933	--	--	--	--	--	--	--	--	--	--	--	--	--	--	--	--	--	--	--	--	--	--	--	--	--	--	--	--
c91308_g1	29.0023	3.39955	3.0928	0.031497	935	--	--	--	--	--	--	--	--	--	--	--	--	--	--	--	--	--	--	--	--	--	--	--	--	--	--	--	--
c80581_g1	268.863	4.35724	5.9473	0.031579	803	--	--	--	--	--	--	--	--	--	--	--	--	--	--	--	--	--	--	--	--	--	--	--	--	--	--	--	--
c94394_g2	9.70832	66.7528	-2.7815	0.032027	1330	--	--	--	--	--	--	--	--	--	--	--	--	--	--	--	--	--	--	PF00451	Scorpion short toxin, BmKK2	GO:0006810//GO:0009405	transport//pathogenesis	GO:0008200	ion channel inhibitor activity	GO:0005576	extracellular region	--	--
c73150_g1	19.754	1.503	3.7162	0.032045	1096	657541125	XP_008276504.1	580	1.17e-68	PREDICTED: acetylserotonin O-methyltransferase-like [Stegastes partitus]	548352880	XM_005728640.1	206	7.69e-102	PREDICTED: Pundamilia nyererei acetylserotonin O-methyltransferase-like (LOC102199344), mRNA	K00543	ASMT	acetylserotonin N-methyltransferase	http://www.genome.jp/dbget-bin/www_bget?ko:K00543	P46597	385	5.96e-41	Acetylserotonin O-methyltransferase OS=Homo sapiens GN=ASMT PE=1 SV=1	PF00891	O-methyltransferase	--	--	GO:0008171	O-methyltransferase activity	--	--	--	--
c104418_g1	67.9407	10.7628	2.6582	0.03217	1471	657554971	XP_008281974.1	1282	1.09e-170	PREDICTED: nuclear factor interleukin-3-regulated protein-like [Stegastes partitus]	499024411	XM_004562906.1	523	0	PREDICTED: Maylandia zebra uncharacterized LOC101470054 (LOC101470054), mRNA	K09059	NFIL3, E4BP4	nuclear factor, interleukin 3 regulated	http://www.genome.jp/dbget-bin/www_bget?ko:K09059	Q66J36	233	2.37e-19	Nuclear factor interleukin-3-regulated protein OS=Xenopus laevis GN=nfil3 PE=2 SV=1	PF07716//PF00170//PF02183//PF03131	Basic region leucine zipper//bZIP transcription factor//Homeobox associated leucine zipper//bZIP Maf transcription factor	GO:0006355	regulation of transcription, DNA-templated	GO:0043565//GO:0003700//GO:0003677	sequence-specific DNA binding//sequence-specific DNA binding transcription factor activity//DNA binding	GO:0005634//GO:0005667	nucleus//transcription factor complex	KOG3119	Basic region leucine zipper transcription factor
c106591_g3	11.7937	0	Inf	0.032178	365	542206112	XP_005476535.1	141	5.15e-08	PREDICTED: uncharacterized protein LOC100692229 isoform X3 [Oreochromis niloticus]	--	--	--	--	--	--	--	--	--	--	--	--	--	--	--	--	--	--	--	--	--	--	--
c97112_g2	0.47753	10.6822	-4.4835	0.032394	1259	--	--	--	--	--	--	--	--	--	--	--	--	--	--	--	--	--	--	--	--	--	--	--	--	--	--	--	--
c106117_g1	2.45775	25.4987	-3.375	0.032461	282	617414335	XP_007556439.1	391	6.97e-43	PREDICTED: cytochrome P450 2K1-like isoform X2 [Poecilia formosa]	--	--	--	--	--	K17854	CYP2K	cytochrome P450, family 2, subfamily K	http://www.genome.jp/dbget-bin/www_bget?ko:K17854	Q92090	381	4.6e-43	Cytochrome P450 2K1 OS=Oncorhynchus mykiss GN=cyp2k1 PE=2 SV=1	PF00067	Cytochrome P450	GO:0055114	oxidation-reduction process	GO:0016705//GO:0020037//GO:0005506	oxidoreductase activity, acting on paired donors, with incorporation or reduction of molecular oxygen//heme binding//iron ion binding	--	--	KOG0156	Cytochrome P450 CYP2 subfamily
c99469_g1	1.96269	18.8231	-3.2616	0.032603	2146	317419175	CBN81212.1	1633	0	Heat-stable enterotoxin receptor [Dicentrarchus labrax]	410896165	XM_003961521.1	374	0	PREDICTED: Takifugu rubripes heat-stable enterotoxin receptor-like (LOC101069264), mRNA	K12320	GUCY2C	heat-stable enterotoxin receptor	http://www.genome.jp/dbget-bin/www_bget?ko:K12320	P55204	701	1.56e-77	Heat-stable enterotoxin receptor OS=Sus scrofa GN=GUCY2C PE=2 SV=2	PF00558//PF00069//PF07714	Vpu protein//Protein kinase domain//Protein tyrosine kinase	GO:0006468//GO:0019076//GO:0032801//GO:0006812	protein phosphorylation//viral release from host cell//receptor catabolic process//cation transport	GO:0005261//GO:0004672//GO:0005524	cation channel activity//protein kinase activity//ATP binding	GO:0033644	host cell membrane	--	--
c104682_g1	31.5301	3.95428	2.9952	0.032664	563	--	--	--	--	--	374428415	FQ310507.3	34	1.58e-06	Dicentrarchus labrax chromosome sequence corresponding to linkage group 1, bottom part, complete sequence	--	--	--	--	--	--	--	--	--	--	--	--	--	--	--	--	--	--
c51360_g1	0	8.5533	#NAME?	0.032852	214	--	--	--	--	--	--	--	--	--	--	--	--	--	--	--	--	--	--	--	--	--	--	--	--	--	--	--	--
c124249_g1	106.099	19.0126	2.4804	0.032856	1024	--	--	--	--	--	551517195	XM_005810042.1	217	5.5e-108	PREDICTED: Xiphophorus maculatus syntaxin-binding protein 5-like (LOC102232480), transcript variant X6, mRNA	--	--	--	--	--	--	--	--	--	--	--	--	--	--	--	--	--	--
c88972_g1	0.47753	10.3598	-4.4393	0.033009	608	657580554	XP_008294245.1	745	1.91e-92	PREDICTED: ADAMTS-like protein 5 [Stegastes partitus]	542251216	XM_005461649.1	280	3.04e-143	PREDICTED: Oreochromis niloticus ADAMTS-like protein 5-like (LOC102081252), mRNA	--	--	--	--	Q6ZMM2	192	1.48e-15	ADAMTS-like protein 5 OS=Homo sapiens GN=ADAMTSL5 PE=1 SV=3	PF00965	Tissue inhibitor of metalloproteinase	--	--	GO:0008191	metalloendopeptidase inhibitor activity	--	--	--	--
c100870_g1	2162.44	395.005	2.4527	0.033304	2644	584027734	XP_006808419.1	1743	0	PREDICTED: interferon-induced protein 44-like [Neolamprologus brichardi]	554861071	XM_005940582.1	675	0	PREDICTED: Haplochromis burtoni interferon-induced protein 44-like (LOC102293722), transcript variant X1, mRNA	--	--	--	--	Q8TCB0	598	1.07e-66	Interferon-induced protein 44 OS=Homo sapiens GN=IFI44 PE=2 SV=2	PF00735//PF00009//PF01926//PF04548//PF00005//PF03029//PF03193	Septin//Elongation factor Tu GTP binding domain//50S ribosome-binding GTPase//AIG1 family//ABC transporter//Conserved hypothetical ATP binding protein//Protein of unknown function, DUF258	GO:0007049	cell cycle	GO:0003924//GO:0016887//GO:0000166//GO:0005524//GO:0005525	GTPase activity//ATPase activity//nucleotide binding//ATP binding//GTP binding	--	--	--	--
c99477_g1	20.0694	2.13832	3.2304	0.033588	1205	--	--	--	--	--	--	--	--	--	--	--	--	--	--	--	--	--	--	--	--	--	--	--	--	--	--	--	--
c138389_g1	14.0587	1.02887	3.7723	0.033591	361	--	--	--	--	--	--	--	--	--	--	--	--	--	--	--	--	--	--	--	--	--	--	--	--	--	--	--	--
c89696_g1	42.1585	6.17319	2.7717	0.033726	666	--	--	--	--	--	--	--	--	--	--	--	--	--	--	--	--	--	--	--	--	--	--	--	--	--	--	--	--
c94651_g1	118.603	20.8997	2.5046	0.03378	587	--	--	--	--	--	--	--	--	--	--	--	--	--	--	--	--	--	--	PF00734	Fungal cellulose binding domain	GO:0005975	carbohydrate metabolic process	GO:0030248//GO:0004553	cellulose binding//hydrolase activity, hydrolyzing O-glycosyl compounds	GO:0005576	extracellular region	--	--
c75114_g1	7.23305	48.8402	-2.7554	0.033829	993	341869040	AEK98796.1	323	1.34e-33	interlukin-8 [Larimichthys crocea]	--	--	--	--	--	K10030	IL8, CXCL8	interleukin 8	http://www.genome.jp/dbget-bin/www_bget?ko:K10030	P08317	136	7.12e-09	Interleukin-8 OS=Gallus gallus GN=CXCL8 PE=2 SV=1	PF00048	Small cytokines (intecrine/chemokine), interleukin-8 like	GO:0007165//GO:0006935//GO:0006955	signal transduction//chemotaxis//immune response	GO:0008009	chemokine activity	GO:0005576	extracellular region	--	--
c97890_g2	7.78068	85.7653	-3.4624	0.033833	693	--	--	--	--	--	--	--	--	--	--	--	--	--	--	--	--	--	--	PF05432//PF02949//PF00895//PF08015//PF09026	Bone sialoprotein II (BSP-II)//7tm Odorant receptor//ATP synthase protein 8//Fungal mating-type pheromone//Centromere protein B dimerisation domain	GO:0007165//GO:0015986//GO:0015992//GO:0006355//GO:0007187//GO:0007608//GO:0001503//GO:0007155	signal transduction//ATP synthesis coupled proton transport//proton transport//regulation of transcription, DNA-templated//G-protein coupled receptor signaling pathway, coupled to cyclic nucleotide second messenger//sensory perception of smell//ossification//cell adhesion	GO:0003682//GO:0005549//GO:0015078//GO:0004984//GO:0000772//GO:0003677	chromatin binding//odorant binding//hydrogen ion transmembrane transporter activity//olfactory receptor activity//mating pheromone activity//DNA binding	GO:0016020//GO:0005634//GO:0000276//GO:0005576//GO:0000775//GO:0000785	membrane//nucleus//mitochondrial proton-transporting ATP synthase complex, coupling factor F(o)//extracellular region//chromosome, centromeric region//chromatin	--	--
c95925_g1	145.257	24.1904	2.5861	0.033855	1214	658923532	XP_008401480.1	332	5.91e-33	PREDICTED: myelin-oligodendrocyte glycoprotein-like [Poecilia reticulata]	--	--	--	--	--	--	--	--	--	Q5R764	146	6.22e-09	Coxsackievirus and adenovirus receptor homolog OS=Pongo abelii GN=CXADR PE=2 SV=1	--	--	--	--	--	--	--	--	--	--
c86075_g1	16.9589	1.42241	3.5756	0.034078	944	--	--	--	--	--	--	--	--	--	--	--	--	--	--	--	--	--	--	--	--	--	--	--	--	--	--	--	--
c103605_g1	3700.39	19293.5	-2.3824	0.034079	10286	657567869	XP_008287339.1	13730	0	PREDICTED: apolipoprotein B-100-like [Stegastes partitus]	542201991	XM_003446376.2	4632	0	PREDICTED: Oreochromis niloticus apolipoprotein B-100-like (LOC100696798), mRNA	K14462	APOB	apolipoprotein B	http://www.genome.jp/dbget-bin/www_bget?ko:K14462	E9Q414	3422	0	Apolipoprotein B-100 OS=Mus musculus GN=Apob PE=1 SV=1	PF01956//PF01347//PF04265//PF12658//PF07464//PF09172//PF06448	Integral membrane protein DUF106//Lipoprotein amino terminal region//Thiamin pyrophosphokinase, vitamin B1 binding domain//Telomere capping, CST complex subunit//Apolipophorin-III precursor (apoLp-III)//Domain of unknown function (DUF1943)//Domain of Unknown Function (DUF1081)	GO:0010833//GO:0006772//GO:0006869//GO:0009229	telomere maintenance via telomere lengthening//thiamine metabolic process//lipid transport//thiamine diphosphate biosynthetic process	GO:0043047//GO:0005319//GO:0004788//GO:0008289	single-stranded telomeric DNA binding//lipid transporter activity//thiamine diphosphokinase activity//lipid binding	GO:0005576//GO:0016020	extracellular region//membrane	--	--
c104224_g2	3.36024	26.8217	-2.9968	0.034127	1503	528905191	XP_001788558.3	233	5.07e-20	PREDICTED: intermediate filament family orphan 1-like, partial [Bos taurus]	551506472	XM_005804712.1	115	4.1e-51	PREDICTED: Xiphophorus maculatus intermediate filament family orphan 1-like (LOC102222879), mRNA	--	--	--	--	Q8BXL9	234	2.49e-19	Intermediate filament family orphan 1 OS=Mus musculus GN=Iffo1 PE=2 SV=1	PF00038	Intermediate filament protein	--	--	GO:0005198	structural molecule activity	GO:0005882	intermediate filament	--	--
c74547_g1	31.0701	3.95428	2.974	0.034131	216	--	--	--	--	--	--	--	--	--	--	--	--	--	--	--	--	--	--	--	--	--	--	--	--	--	--	--	--
c102770_g2	3.87281	29.9983	-2.9534	0.034216	2462	657591630	XP_008300306.1	1330	1.3e-172	PREDICTED: tyrosine-protein kinase STYK1-like [Stegastes partitus] >gi|657591632|ref|XP_008300307.1| PREDICTED: tyrosine-protein kinase STYK1-like [Stegastes partitus] >gi|657591634|ref|XP_008300308.1| PREDICTED: tyrosine-protein kinase STYK1-like [Stegastes partitus]	498984518	XM_004550755.1	487	0	PREDICTED: Maylandia zebra tyrosine-protein kinase STYK1-like (LOC101469074), mRNA	K17510	STYK1	tyrosine-protein kinase STYK1	http://www.genome.jp/dbget-bin/www_bget?ko:K17510	Q6J9G0	295	7.96e-27	Tyrosine-protein kinase STYK1 OS=Homo sapiens GN=STYK1 PE=1 SV=4	PF00069//PF07714	Protein kinase domain//Protein tyrosine kinase	GO:0006468	protein phosphorylation	GO:0005524//GO:0004672	ATP binding//protein kinase activity	--	--	KOG0200	Fibroblast/platelet-derived growth factor receptor and related receptor tyrosine kinases
c72800_g1	198.609	35.4461	2.4862	0.034227	434	--	--	--	--	--	--	--	--	--	--	--	--	--	--	--	--	--	--	--	--	--	--	--	--	--	--	--	--
c58492_g1	0.495054	15.6559	-4.983	0.034248	713	657599579	XP_008304608.1	633	1.08e-72	PREDICTED: myosin-11-like, partial [Stegastes partitus]	542182559	XM_005469090.1	318	2.7e-164	PREDICTED: Oreochromis niloticus myosin-11-like (LOC100701079), transcript variant X5, mRNA	K10352	MYH	myosin heavy chain	http://www.genome.jp/dbget-bin/www_bget?ko:K10352	P10587	392	6.14e-41	Myosin-11 OS=Gallus gallus GN=MYH11 PE=1 SV=4	PF00769//PF04111//PF06009//PF01544//PF09177//PF05046//PF00038//PF03367//PF08702//PF01576//PF04632//PF10473//PF06810//PF00103	Ezrin/radixin/moesin family//Autophagy protein Apg6//Laminin Domain II//CorA-like Mg2+ transporter protein//Syntaxin 6, N-terminal//Mitochondrial large subunit ribosomal protein (Img2)//Intermediate filament protein//ZPR1 zinc-finger domain//Fibrinogen alpha/beta chain family//Myosin tail//Fusaric acid resistance protein family//Leucine-rich repeats of kinetochore protein Cenp-F/LEK1//Phage minor…	GO:0006810//GO:0051258//GO:0030168//GO:0007155//GO:0006914//GO:0007165//GO:0006412//GO:0048193//GO:0042254//GO:0030001//GO:0055085	transport//protein polymerization//platelet activation//cell adhesion//autophagy//signal transduction//translation//Golgi vesicle transport//ribosome biogenesis//metal ion transport//transmembrane transport	GO:0042803//GO:0003774//GO:0046873//GO:0003735//GO:0008134//GO:0008092//GO:0030674//GO:0045502//GO:0005179//GO:0005102//GO:0005198//GO:0008270	protein homodimerization activity//motor activity//metal ion transmembrane transporter activity//structural constituent of ribosome//transcription factor binding//cytoskeletal protein binding//protein binding, bridging//dynein binding//hormone activity//receptor binding//structural molecule activity//zinc ion binding	GO:0005882//GO:0005737//GO:0016459//GO:0019898//GO:0005667//GO:0005577//GO:0005622//GO:0005886//GO:0016020//GO:0030286//GO:0005576//GO:0005604//GO:0005840	intermediate filament//cytoplasm//myosin complex//extrinsic component of membrane//transcription factor complex//fibrinogen complex//intracellular//plasma membrane//membrane//dynein complex//extracellular region//basement membrane//ribosome	KOG0161	Myosin class II heavy chain
c186377_g1	0	11.7016	#NAME?	0.034412	1016	338903435	BAK43287.1	1586	0	chitinase 2 [Parapristipoma trilineatum]	338903434	AB642678.1	883	0	Parapristipoma trilineatum mRNA for chitinase 2, complete cds	K01183	E3.2.1.14	chitinase	http://www.genome.jp/dbget-bin/www_bget?ko:K01183	Q9BZP6	1072	6.28e-142	Acidic mammalian chitinase OS=Homo sapiens GN=CHIA PE=1 SV=1	PF00704	Glycosyl hydrolases family 18	GO:0005975	carbohydrate metabolic process	GO:0004553	hydrolase activity, hydrolyzing O-glycosyl compounds	--	--	KOG2806	Chitinase
c106732_g2	36.3186	2.37068	3.9373	0.03445	510	--	--	--	--	--	--	--	--	--	--	--	--	--	--	--	--	--	--	--	--	--	--	--	--	--	--	--	--
c106253_g1	83.8131	12.9011	2.6997	0.034657	1239	542244912	XP_005459308.1	188	2.67e-12	PREDICTED: neurofilament heavy polypeptide-like isoform X5 [Oreochromis niloticus]	--	--	--	--	--	--	--	--	--	--	--	--	--	--	--	--	--	--	--	--	--	--	--
c123303_g1	0	7.28265	#NAME?	0.034705	675	--	--	--	--	--	--	--	--	--	--	--	--	--	--	--	--	--	--	--	--	--	--	--	--	--	--	--	--
c34566_g1	0	7.28265	#NAME?	0.034705	675	213385110	BAG84239.1	689	5.24e-89	myoglobin [Seriola dumerili]	297591800	AB470257.2	352	0	Seriola dumerili Mb mRNA for myoglobin, complete cds	--	--	--	--	Q9DGJ1	677	9.03e-89	Myoglobin OS=Makaira nigricans GN=mb PE=2 SV=3	PF00042	Globin	--	--	GO:0005506//GO:0020037	iron ion binding//heme binding	--	--	--	--
c136459_g1	0	7.20206	#NAME?	0.035	414	--	--	--	--	--	--	--	--	--	--	--	--	--	--	--	--	--	--	--	--	--	--	--	--	--	--	--	--
c80426_g1	2.44022	22.0897	-3.1783	0.035054	728	--	--	--	--	--	--	--	--	--	--	--	--	--	--	--	--	--	--	--	--	--	--	--	--	--	--	--	--
c100599_g2	52.2041	8.15033	2.6792	0.035209	1812	348513191	XP_003444126.1	1346	0	PREDICTED: transmembrane protein 55A-like isoform X1 [Oreochromis niloticus] >gi|498973670|ref|XP_004548193.1| PREDICTED: transmembrane protein 55A-like isoform X2 [Maylandia zebra] >gi|548352445|ref|XP_005728483.1| PREDICTED: type 2 phosphatidylinositol 4,5-bisphosphate 4-phosphatase-like isoform X2 [Pundamilia nyererei] >gi|554813392|ref|XP_005917529.1| PREDICTED: type 2 phosphatidylinositol 4,…	542211475	XM_003444078.2	748	0	PREDICTED: Oreochromis niloticus transmembrane protein 55A-like (LOC100706272), transcript variant X1, mRNA	K13084	TMEM55	phosphatidylinositol-4,5-bisphosphate 4-phosphatase	http://www.genome.jp/dbget-bin/www_bget?ko:K13084	Q8N4L2	1259	2.31e-169	Type 2 phosphatidylinositol 4,5-bisphosphate 4-phosphatase OS=Homo sapiens GN=TMEM55A PE=1 SV=1	PF05495//PF02892//PF01155	CHY zinc finger//BED zinc finger//Hydrogenase expression/synthesis hypA family	GO:0006464	cellular protein modification process	GO:0016151//GO:0003677//GO:0008270	nickel cation binding//DNA binding//zinc ion binding	--	--	KOG4684	Uncharacterized conserved protein, contains C4-type Zn-finger
c93696_g1	58.9421	319.404	-2.438	0.035385	2429	432909811	XP_004078220.1	2042	0	PREDICTED: transmembrane channel-like protein 7-like [Oryzias latipes]	551494736	XM_005798876.1	478	0	PREDICTED: Xiphophorus maculatus transmembrane channel-like protein 7-like (LOC102222166), mRNA	--	--	--	--	Q5YCC5	1006	2.55e-122	Transmembrane channel-like protein 7 OS=Gallus gallus GN=Tmc7 PE=2 SV=1	PF08395//PF07810	7tm Chemosensory receptor//TMC domain	GO:0050909	sensory perception of taste	--	--	GO:0016021	integral component of membrane	--	--
c99450_g1	3541.32	677.71	2.3855	0.035654	2508	317419417	CBN81454.1	2160	0	Hyaluronan-binding protein 2, partial [Dicentrarchus labrax]	374428415	FQ310507.3	244	1.34e-122	Dicentrarchus labrax chromosome sequence corresponding to linkage group 1, bottom part, complete sequence	K08648	HABP2	hyaluronan binding protein 2	http://www.genome.jp/dbget-bin/www_bget?ko:K08648	Q8K0D2	1123	1.64e-141	Hyaluronan-binding protein 2 OS=Mus musculus GN=Habp2 PE=1 SV=2	PF00008//PF02072//PF06247//PF00089//PF09064	EGF-like domain//Prepro-orexin//Plasmodium ookinete surface protein Pvs28//Trypsin//Thrombomodulin like fifth domain, EGF-like	GO:0007218//GO:0007631//GO:0006508//GO:0007165	neuropeptide signaling pathway//feeding behavior//proteolysis//signal transduction	GO:0005515//GO:0004888//GO:0004252	protein binding//transmembrane signaling receptor activity//serine-type endopeptidase activity	GO:0009986//GO:0016021//GO:0016020	cell surface//integral component of membrane//membrane	KOG3627	Trypsin
c99642_g1	71.0162	11.7111	2.6003	0.035701	901	--	--	--	--	--	--	--	--	--	--	--	--	--	--	--	--	--	--	--	--	--	--	--	--	--	--	--	--
c82773_g1	82.1878	13.2046	2.6379	0.035709	531	--	--	--	--	--	--	--	--	--	--	--	--	--	--	--	--	--	--	--	--	--	--	--	--	--	--	--	--
c46158_g1	10.6634	0.474136	4.4912	0.03622	743	--	--	--	--	--	--	--	--	--	--	--	--	--	--	--	--	--	--	--	--	--	--	--	--	--	--	--	--
c105884_g3	19.8942	111.805	-2.4906	0.036235	1948	152013691	ABS19961.1	192	3.06e-14	selenoprotein W2 [Artemia franciscana]	374428416	FQ310508.3	66	9.27e-24	Dicentrarchus labrax chromosome sequence corresponding to linkage group 18, complete sequence	K07401	K07401	selenoprotein W-related protein	http://www.genome.jp/dbget-bin/www_bget?ko:K07401	Q9CQ86	145	2.43e-09	Migration and invasion enhancer 1 OS=Mus musculus GN=Mien1 PE=1 SV=1	PF10262	Rdx family	GO:0045454	cell redox homeostasis	GO:0008430	selenium binding	--	--	--	--
c97531_g2	3.89034	28.3153	-2.8636	0.03627	2185	657747220	XP_008308902.1	1054	2.7e-128	PREDICTED: anoctamin-9-like [Cynoglossus semilaevis]	542259139	XM_005464747.1	343	1.08e-177	PREDICTED: Oreochromis niloticus anoctamin-9-like (LOC100691858), transcript variant X2, mRNA	--	--	--	--	A1A5B4	556	3.38e-59	Anoctamin-9 OS=Homo sapiens GN=ANO9 PE=2 SV=2	--	--	--	--	--	--	--	--	KOG2513	Protein required for meiotic chromosome segregation
c4966_g1	7.33819	0	Inf	0.036271	448	--	--	--	--	--	--	--	--	--	--	--	--	--	--	--	--	--	--	--	--	--	--	--	--	--	--	--	--
c188423_g1	10.6283	0.474136	4.4865	0.036306	696	--	--	--	--	--	--	--	--	--	--	--	--	--	--	--	--	--	--	--	--	--	--	--	--	--	--	--	--
c76399_g1	7.32067	0	Inf	0.036345	532	--	--	--	--	--	--	--	--	--	--	--	--	--	--	--	--	--	--	--	--	--	--	--	--	--	--	--	--
c96077_g1	188.462	35.3038	2.4164	0.036489	3361	657592941	XP_008301020.1	1882	0	PREDICTED: protein unc-13 homolog B-like, partial [Stegastes partitus]	499004376	XM_004555655.1	874	0	PREDICTED: Maylandia zebra protein unc-13 homolog B-like (LOC101465195), mRNA	K15293	UNC13, MUNC13	protein unc-13	http://www.genome.jp/dbget-bin/www_bget?ko:K15293	Q62769	1244	1.1e-145	Protein unc-13 homolog B OS=Rattus norvegicus GN=Unc13b PE=1 SV=2	PF00168	C2 domain	--	--	GO:0005515	protein binding	--	--	KOG1011	Neurotransmitter release regulator, UNC-13
c80382_g2	7.28562	0	Inf	0.036495	407	--	--	--	--	--	--	--	--	--	--	--	--	--	--	--	--	--	--	--	--	--	--	--	--	--	--	--	--
c144239_g1	7.2681	0	Inf	0.036571	544	--	--	--	--	--	--	--	--	--	--	--	--	--	--	--	--	--	--	--	--	--	--	--	--	--	--	--	--
c122345_g1	7.25057	0	Inf	0.036647	968	--	--	--	--	--	--	--	--	--	--	--	--	--	--	--	--	--	--	--	--	--	--	--	--	--	--	--	--
c99970_g4	1.45011	40.9557	-4.8198	0.036707	1149	348510157	XP_003442612.1	1066	4.61e-141	PREDICTED: prostasin-like [Oreochromis niloticus]	432867578	XM_004071204.1	100	6.79e-43	PREDICTED: Oryzias latipes transmembrane protease serine 9-like (LOC101157699), mRNA	K09628	PRSS27	protease, serine 27	http://www.genome.jp/dbget-bin/www_bget?ko:K09628	Q9BQR3	584	1.66e-70	Serine protease 27 OS=Homo sapiens GN=PRSS27 PE=1 SV=1	PF00089	Trypsin	GO:0006508	proteolysis	GO:0004252	serine-type endopeptidase activity	--	--	KOG3627	Trypsin
c104206_g3	16.4288	1.66419	3.3033	0.036709	2143	--	--	--	--	--	--	--	--	--	--	--	--	--	--	--	--	--	--	--	--	--	--	--	--	--	--	--	--
c99540_g1	531.101	2787.04	-2.3917	0.036817	2547	548458967	XP_005747578.1	1905	0	PREDICTED: torsin-3A-like [Pundamilia nyererei] >gi|554872124|ref|XP_005946008.1| PREDICTED: torsin-3A-like [Haplochromis burtoni]	542213168	XM_003439998.2	838	0	PREDICTED: Oreochromis niloticus torsin-3A-like (LOC100707785), mRNA	--	--	--	--	Q9H497	955	1.25e-118	Torsin-3A OS=Homo sapiens GN=TOR3A PE=1 SV=1	PF07012//PF01213//PF06309//PF00004	Curlin associated repeat//Adenylate cyclase associated (CAP) N terminal//Torsin//ATPase family associated with various cellular activities (AAA)	GO:0007010//GO:0051085//GO:0007155	cytoskeleton organization//chaperone mediated protein folding requiring cofactor//cell adhesion	GO:0003779//GO:0005524	actin binding//ATP binding	GO:0009289	pilus	KOG2170	ATPase of the AAA+ superfamily
c86013_g1	0.95506	84.1116	-6.4606	0.037007	2516	657527299	XP_008287053.1	2064	0	PREDICTED: beta,beta-carotene 9',10'-oxygenase-like [Stegastes partitus]	542240103	XM_003452652.2	819	0	PREDICTED: Oreochromis niloticus beta,beta-carotene 9',10'-oxygenase-like (LOC100708996), mRNA	K10252	BCDO2	beta,beta-carotene 9',10'-dioxygenase	http://www.genome.jp/dbget-bin/www_bget?ko:K10252	Q8HXG8	1211	1.36e-154	Beta,beta-carotene 9',10'-oxygenase OS=Macaca fascicularis GN=BCO2 PE=2 SV=2	--	--	--	--	--	--	--	--	--	--
c170479_g1	0.495054	9.96628	-4.3314	0.037474	3730	657557970	XP_008283094.1	4136	0	PREDICTED: aminopeptidase N-like [Stegastes partitus] >gi|657557973|ref|XP_008283095.1| PREDICTED: aminopeptidase N-like [Stegastes partitus]	542213919	XM_003437563.2	1379	0	PREDICTED: Oreochromis niloticus aminopeptidase N-like (LOC100708125), mRNA	K11140	ANPEP	aminopeptidase N	http://www.genome.jp/dbget-bin/www_bget?ko:K11140	O57579	3030	0	Aminopeptidase N OS=Gallus gallus GN=ANPEP PE=1 SV=1	PF01433	Peptidase family M1	--	--	GO:0008270//GO:0008237	zinc ion binding//metallopeptidase activity	--	--	KOG1046	Puromycin-sensitive aminopeptidase and related aminopeptidases
c90542_g2	2.47527	21.0514	-3.0883	0.037779	1063	317419124	CBN81161.1	1452	0	Tripartite motif-containing protein 39 [Dicentrarchus labrax]	499011701	XM_004557484.1	565	0	PREDICTED: Maylandia zebra E3 ubiquitin-protein ligase TRIM69-like (LOC101465768), transcript variant X1, mRNA	--	--	--	--	Q13410	174	2.38e-12	Butyrophilin subfamily 1 member A1 OS=Homo sapiens GN=BTN1A1 PE=1 SV=3	--	--	--	--	--	--	--	--	--	--
c17833_g1	21.8218	2.53187	3.1075	0.037948	1131	657542649	XP_008277046.1	607	1.12e-71	PREDICTED: protein Wnt-8b [Stegastes partitus]	542237763	XM_003451944.2	324	2.01e-167	PREDICTED: Oreochromis niloticus protein Wnt-8b-like (LOC100698344), mRNA	K00714	WNT8	wingless-type MMTV integration site family, member 8	http://www.genome.jp/dbget-bin/www_bget?ko:K00714	P51029	534	2.08e-62	Protein Wnt-8b OS=Danio rerio GN=wnt8b PE=2 SV=1	PF00110	wnt family	GO:0007275//GO:0007165//GO:0016055	multicellular organismal development//signal transduction//Wnt signaling pathway	GO:0005102	receptor binding	GO:0005576	extracellular region	--	--
c96975_g1	6.29551	87.1364	-3.7909	0.038286	306	--	--	--	--	--	--	--	--	--	--	--	--	--	--	--	--	--	--	--	--	--	--	--	--	--	--	--	--
c95048_g1	72.8781	374.024	-2.3596	0.038327	3189	--	--	--	--	--	374428414	FQ310506.3	73	1.96e-27	Dicentrarchus labrax chromosome sequence corresponding to linkage group 1, top part, complete sequence	--	--	--	--	--	--	--	--	--	--	--	--	--	--	--	--	--	--
c90899_g1	0	9.10802	#NAME?	0.038588	541	--	--	--	--	--	--	--	--	--	--	--	--	--	--	--	--	--	--	--	--	--	--	--	--	--	--	--	--
c105513_g1	148.512	27.9406	2.4101	0.038838	2506	657577378	XP_008292515.1	1175	2.14e-148	PREDICTED: solute carrier family 43 member 3-like [Stegastes partitus]	112420698	BT027515.1	525	0	Gasterosteus aculeatus clone CGX27-A06 mRNA sequence	K08230	SLC43A3	MFS transporter, LAT3 family, solute carrier family 43, member 3	http://www.genome.jp/dbget-bin/www_bget?ko:K08230	Q8NBI5	701	1.04e-80	Solute carrier family 43 member 3 OS=Homo sapiens GN=SLC43A3 PE=1 SV=2	PF07690//PF05784	Major Facilitator Superfamily//Betaherpesvirus UL82/83 protein N terminus	GO:0055085//GO:0009405	transmembrane transport//pathogenesis	--	--	GO:0016021	integral component of membrane	--	--
c73925_g1	5.3755	35.5267	-2.7244	0.039175	878	47226634	CAG07793.1	225	7.42e-20	unnamed protein product [Tetraodon nigroviridis]	--	--	--	--	--	--	--	--	--	--	--	--	--	PF00048	Small cytokines (intecrine/chemokine), interleukin-8 like	GO:0006955//GO:0007165//GO:0006935	immune response//signal transduction//chemotaxis	GO:0008009	chemokine activity	GO:0005576	extracellular region	--	--
c81938_g1	0.972585	12.9817	-3.7385	0.039225	539	--	--	--	--	--	--	--	--	--	--	--	--	--	--	--	--	--	--	--	--	--	--	--	--	--	--	--	--
c107686_g1	0.95506	12.9011	-3.7558	0.039369	783	658905390	XP_008435408.1	824	1.92e-108	PREDICTED: cytolysin RTX-A-like [Poecilia reticulata]	554805842	XM_005913799.1	302	2.34e-155	PREDICTED: Haplochromis burtoni cytolysin Src-1-like (LOC102314396), mRNA	--	--	--	--	Q9Y1U9	161	4.65e-12	Equinatoxin-4 OS=Actinia equina PE=2 SV=1	PF06369	Sea anemone cytotoxic protein	GO:0052331//GO:0046931//GO:0006812//GO:0006810	hemolysis in other organism involved in symbiotic interaction//pore complex assembly//cation transport//transport	GO:0015267	channel activity	GO:0046930	pore complex	--	--
c67836_g1	7.2681	46.7919	-2.6866	0.039476	1607	542262272	XP_005465988.1	1363	5.34e-178	PREDICTED: calpain-2 catalytic subunit-like [Oreochromis niloticus]	75992785	DQ192031.1	84	7.51e-34	Stizostedion vitreum vitreum putative calpain-like protein mRNA, complete cds	K03853	CAPN2	calpain-2	http://www.genome.jp/dbget-bin/www_bget?ko:K03853	P06814	983	2.49e-126	Calpain-2 catalytic subunit (Fragment) OS=Oryctolagus cuniculus GN=CAPN2 PE=1 SV=1	PF00648//PF13499//PF00036//PF13405	Calpain family cysteine protease//EF-hand domain pair//EF hand//EF-hand domain	GO:0006508	proteolysis	GO:0004198//GO:0005509	calcium-dependent cysteine-type endopeptidase activity//calcium ion binding	GO:0005622	intracellular	KOG0045	Cytosolic Ca2+-dependent cysteine protease (calpain), large subunit (EF-Hand protein superfamily)
c103485_g1	9.67327	59.0577	-2.61	0.039527	3050	657587627	XP_008298114.1	1367	3.09e-171	PREDICTED: WD repeat-containing protein 78 [Stegastes partitus]	551524868	XM_005813860.1	317	4.31e-163	PREDICTED: Xiphophorus maculatus WD repeat-containing protein 78-like (LOC102218912), mRNA	--	--	--	--	E9PYY5	849	3.96e-97	WD repeat-containing protein 78 OS=Mus musculus GN=Wdr78 PE=2 SV=1	PF00400	WD domain, G-beta repeat	--	--	GO:0005515	protein binding	--	--	KOG1587	Cytoplasmic dynein intermediate chain
c77662_g1	3.43033	90.0524	-4.7143	0.039645	2831	657582594	XP_008295363.1	1053	2.04e-133	PREDICTED: dual specificity protein phosphatase 14 [Stegastes partitus]	542201499	XM_005474769.1	823	0	PREDICTED: Oreochromis niloticus dual specificity protein phosphatase 14-like (LOC100697047), mRNA	K14165	K14165	atypical dual specificity phosphatase	http://www.genome.jp/dbget-bin/www_bget?ko:K14165	Q17QM8	774	2.15e-94	Dual specificity protein phosphatase 14 OS=Bos taurus GN=DUSP14 PE=2 SV=1	PF00102//PF00782	Protein-tyrosine phosphatase//Dual specificity phosphatase, catalytic domain	GO:0006470//GO:0006570	protein dephosphorylation//tyrosine metabolic process	GO:0004725//GO:0008138	protein tyrosine phosphatase activity//protein tyrosine/serine/threonine phosphatase activity	--	--	KOG1716	Dual specificity phosphatase
c54601_g1	0.972585	12.6593	-3.7022	0.039707	285	--	--	--	--	--	--	--	--	--	--	--	--	--	--	--	--	--	--	--	--	--	--	--	--	--	--	--	--
c102700_g1	873.561	169.929	2.362	0.040117	8167	657592544	XP_008300802.1	7685	0	PREDICTED: helicase with zinc finger domain 2 [Stegastes partitus]	542226406	XM_005452266.1	1786	0	PREDICTED: Oreochromis niloticus helicase with zinc finger domain 2-like (LOC100709784), mRNA	--	--	--	--	E9QAM5	1556	0	Helicase with zinc finger domain 2 OS=Mus musculus GN=Helz2 PE=1 SV=1	PF02562//PF00004//PF00773//PF07728//PF06657//PF00910//PF00580//PF04851//PF01695//PF03193	PhoH-like protein//ATPase family associated with various cellular activities (AAA)//RNB domain//AAA domain (dynein-related subfamily)//Centrosome microtubule-binding domain of Cep57//RNA helicase//UvrD/REP helicase N-terminal domain//Type III restriction enzyme, res subunit//IstB-like ATP binding protein//Protein of unknown function, DUF258	GO:0051252	regulation of RNA metabolic process	GO:0005525//GO:0003723//GO:0005524//GO:0004540//GO:0016887//GO:0016787//GO:0008017//GO:0003924//GO:0003724//GO:0003677	GTP binding//RNA binding//ATP binding//ribonuclease activity//ATPase activity//hydrolase activity//microtubule binding//GTPase activity//RNA helicase activity//DNA binding	GO:0045298	tubulin complex	KOG2102	Exosomal 3'-5' exoribonuclease complex, subunit Rrp44/Dis3
c57628_g1	0.972585	17.6331	-4.1803	0.040548	1258	657599579	XP_008304608.1	1736	0	PREDICTED: myosin-11-like, partial [Stegastes partitus]	554827190	XM_005924148.1	832	0	PREDICTED: Haplochromis burtoni myosin-11-like (LOC102302113), transcript variant X5, mRNA	K10352	MYH	myosin heavy chain	http://www.genome.jp/dbget-bin/www_bget?ko:K10352	P10587	1256	5.09e-155	Myosin-11 OS=Gallus gallus GN=MYH11 PE=1 SV=4	PF00038//PF13851//PF04111//PF06160//PF06009//PF07926//PF01576//PF04513	Intermediate filament protein//Growth-arrest specific micro-tubule binding//Autophagy protein Apg6//Septation ring formation regulator, EzrA//Laminin Domain II//TPR/MLP1/MLP2-like protein//Myosin tail//Baculovirus polyhedron envelope protein, PEP, C terminus	GO:0048870//GO:0006606//GO:0006914//GO:0007155//GO:0000921	cell motility//protein import into nucleus//autophagy//cell adhesion//septin ring assembly	GO:0005198//GO:0003774	structural molecule activity//motor activity	GO:0019031//GO:0005604//GO:0031514//GO:0005643//GO:0005940//GO:0019028//GO:0016459//GO:0016021//GO:0005882	viral envelope//basement membrane//motile cilium//nuclear pore//septin ring//viral capsid//myosin complex//integral component of membrane//intermediate filament	KOG0161	Myosin class II heavy chain
c96658_g1	44.9492	6.7185	2.7421	0.040726	627	--	--	--	--	--	380853835	JQ268273.1	39	2.94e-09	Oplegnathus fasciatus warm-temperature-acclimation-related 65-kDa protein (Wap65-1) gene, complete cds	--	--	--	--	--	--	--	--	--	--	--	--	--	--	--	--	--	--
c99770_g1	231.322	1113.37	-2.267	0.040799	3876	291190544	NP_001167287.1	752	7.35e-86	Viral myc transforming protein [Salmo salar] >gi|223649052|gb|ACN11284.1| Viral myc transforming protein [Salmo salar]	374428414	FQ310506.3	734	0	Dicentrarchus labrax chromosome sequence corresponding to linkage group 1, top part, complete sequence	K04377	MYC	Myc proto-oncogene protein	http://www.genome.jp/dbget-bin/www_bget?ko:K04377	P49709	236	2.66e-19	Transcriptional regulator Myc OS=Carassius auratus GN=myc PE=3 SV=1	PF00010//PF01056//PF09726//PF02344	Helix-loop-helix DNA-binding domain//Myc amino-terminal region//Transmembrane protein//Myc leucine zipper domain	GO:0006355	regulation of transcription, DNA-templated	GO:0003700//GO:0046983	sequence-specific DNA binding transcription factor activity//protein dimerization activity	GO:0005634//GO:0005667//GO:0016021	nucleus//transcription factor complex//integral component of membrane	KOG2483	Upstream transcription factor 2/L-myc-2 protein
c103095_g2	23.802	127.418	-2.4204	0.041147	2485	583992627	XP_006791486.1	720	9.52e-82	PREDICTED: cytochrome P450 2K1-like [Neolamprologus brichardi]	542227076	XM_003446721.2	87	2.51e-35	PREDICTED: Oreochromis niloticus uncharacterized LOC100700011 (LOC100700011), transcript variant 2, mRNA	K17854	CYP2K	cytochrome P450, family 2, subfamily K	http://www.genome.jp/dbget-bin/www_bget?ko:K17854	O93299	611	3.34e-68	Cytochrome P450 2K3 OS=Oncorhynchus mykiss GN=cyp2k3 PE=2 SV=1	PF00067	Cytochrome P450	GO:0055114	oxidation-reduction process	GO:0020037//GO:0005506//GO:0016705	heme binding//iron ion binding//oxidoreductase activity, acting on paired donors, with incorporation or reduction of molecular oxygen	--	--	KOG0156	Cytochrome P450 CYP2 subfamily
c81865_g1	4.38539	30.7142	-2.8081	0.041372	986	542227729	XP_005452826.1	993	1.94e-126	PREDICTED: ribonuclease ZC3H12A-like [Oreochromis niloticus]	548406918	XM_005739716.1	360	0	PREDICTED: Pundamilia nyererei ribonuclease ZC3H12A-like (LOC102206103), mRNA	--	--	--	--	A6QQJ8	644	8.06e-77	Ribonuclease ZC3H12A OS=Bos taurus GN=ZC3H12A PE=2 SV=1	PF01787	Ilarvirus coat protein	GO:0006413	translational initiation	GO:0003723	RNA binding	GO:0019012	virion	KOG3777	Uncharacterized conserved protein
c91301_g1	39.1005	5.85082	2.7405	0.041429	1678	657569039	XP_008287982.1	1045	2.13e-136	PREDICTED: synapse differentiation-inducing gene protein 1-like [Stegastes partitus]	548423186	XM_005742729.1	702	0	PREDICTED: Pundamilia nyererei synapse differentiation-inducing gene protein 1-like (LOC102194353), mRNA	--	--	--	--	Q5TZE2	628	1.8e-75	Synapse differentiation-inducing gene protein 1-like OS=Danio rerio GN=syndig1l PE=3 SV=1	PF04505	Interferon-induced transmembrane protein	GO:0009607	response to biotic stimulus	--	--	GO:0016021	integral component of membrane	--	--
c63221_g1	31.5652	4.5896	2.7819	0.041465	1235	--	--	--	--	--	--	--	--	--	--	--	--	--	--	--	--	--	--	--	--	--	--	--	--	--	--	--	--
c160471_g1	0	6.88911	#NAME?	0.041544	374	--	--	--	--	--	--	--	--	--	--	--	--	--	--	--	--	--	--	--	--	--	--	--	--	--	--	--	--
c82687_g1	41.9307	5.53787	2.9206	0.041664	439	--	--	--	--	--	--	--	--	--	--	--	--	--	--	--	--	--	--	--	--	--	--	--	--	--	--	--	--
c102414_g1	7.23305	95.4385	-3.7219	0.041704	3827	657588731	XP_008298719.1	939	7.08e-111	PREDICTED: brain-specific angiogenesis inhibitor 1-associated protein 2-like protein 2 [Stegastes partitus]	499020083	XM_004560768.1	324	6.96e-167	PREDICTED: Maylandia zebra brain-specific angiogenesis inhibitor 1-associated protein 2-like protein 2-like (LOC101478885), mRNA	--	--	--	--	Q1LWE6	804	8.56e-93	Brain-specific angiogenesis inhibitor 1-associated protein 2-like protein 2 OS=Danio rerio GN=baiap2l2 PE=3 SV=1	PF00018//PF08397	SH3 domain//IRSp53/MIM homology domain	GO:0046847//GO:0007165	filopodium assembly//signal transduction	GO:0008093//GO:0005515//GO:0017124	cytoskeletal adaptor activity//protein binding//SH3 domain binding	--	--	--	--
c90575_g1	10.1333	89.9101	-3.1494	0.041747	3354	657526958	XP_008285842.1	650	3.09e-71	PREDICTED: breast carcinoma-amplified sequence 1 isoform X8 [Stegastes partitus]	554816189	XM_005918831.1	318	1.32e-163	PREDICTED: Haplochromis burtoni neurofilament heavy polypeptide-like (LOC102301691), transcript variant X9, mRNA	--	--	--	--	--	--	--	--	PF01669	Myelin basic protein	--	--	GO:0019911	structural constituent of myelin sheath	--	--	--	--
c81922_g1	0	6.80851	#NAME?	0.041905	773	47226654	CAG07813.1	347	9.33e-38	unnamed protein product [Tetraodon nigroviridis]	--	--	--	--	--	--	--	--	--	--	--	--	--	PF01064	Activin types I and II receptor domain	GO:0007178//GO:0016310//GO:0009069	transmembrane receptor protein serine/threonine kinase signaling pathway//phosphorylation//serine family amino acid metabolic process	GO:0005024//GO:0004675	transforming growth factor beta-activated receptor activity//transmembrane receptor protein serine/threonine kinase activity	GO:0016020	membrane	--	--
c81861_g1	0	8.30209	#NAME?	0.042021	646	--	--	--	--	--	--	--	--	--	--	--	--	--	--	--	--	--	--	--	--	--	--	--	--	--	--	--	--
c139556_g1	26.1897	3.80251	2.784	0.042077	552	--	--	--	--	--	--	--	--	--	--	--	--	--	--	--	--	--	--	--	--	--	--	--	--	--	--	--	--
c85901_g1	0	6.64733	#NAME?	0.042656	1914	542225155	XP_003445142.2	1096	2.25e-141	PREDICTED: uncharacterized protein LOC100710236 [Oreochromis niloticus]	--	--	--	--	--	--	--	--	--	--	--	--	--	PF00895	ATP synthase protein 8	GO:0015986//GO:0015992	ATP synthesis coupled proton transport//proton transport	GO:0015078	hydrogen ion transmembrane transporter activity	GO:0000276	mitochondrial proton-transporting ATP synthase complex, coupling factor F(o)	--	--
c51145_g1	121.218	965.338	-2.9934	0.042862	502	--	--	--	--	--	--	--	--	--	--	--	--	--	--	--	--	--	--	--	--	--	--	--	--	--	--	--	--
c75032_g1	2.91775	22.635	-2.9556	0.042889	823	410924133	XP_003975536.1	283	2.64e-25	PREDICTED: xenotropic and polytropic retrovirus receptor 1 homolog isoform 2 [Takifugu rubripes]	554882493	XM_005950910.1	94	1.04e-39	PREDICTED: Haplochromis burtoni xenotropic and polytropic retrovirus receptor 1 homolog (LOC102305178), transcript variant X2, mRNA	--	--	--	--	Q28CY9	234	2.51e-20	Xenotropic and polytropic retrovirus receptor 1 homolog OS=Xenopus tropicalis GN=xpr1 PE=2 SV=1	PF03124	EXS family	--	--	--	--	GO:0016021	integral component of membrane	KOG1162	Predicted small molecule transporter
c82651_g1	0.95506	35.4985	-5.216	0.04325	891	583975181	XP_006782969.1	433	5e-50	PREDICTED: guanylin-like [Neolamprologus brichardi]	229368081	BT083314.1	334	4.35e-173	Anoplopoma fimbria clone afim-evh-001-222 Guanylin precursor putative mRNA, complete cds	--	--	--	--	P79897	160	2.84e-12	Guanylin OS=Sus scrofa GN=GUCA2A PE=3 SV=1	PF02058	Guanylin precursor	--	--	GO:0008047	enzyme activator activity	--	--	--	--
c24707_g1	6.86066	0	Inf	0.043278	693	--	--	--	--	--	--	--	--	--	--	--	--	--	--	--	--	--	--	--	--	--	--	--	--	--	--	--	--
c87983_g1	32.9102	166.61	-2.3399	0.043345	7032	167882614	ACA05825.1	3524	0	phospholipase C delta 1A [Paralichthys olivaceus]	167882613	EU433320.1	1373	0	Paralichthys olivaceus phospholipase C delta 1A mRNA, complete cds	K05761	VIL1	villin 1	http://www.genome.jp/dbget-bin/www_bget?ko:K05761	P02640	2441	0	Villin-1 OS=Gallus gallus GN=VIL1 PE=1 SV=2	PF02209//PF13202//PF05294//PF13499//PF00387//PF13405//PF00168//PF03009//PF08919//PF00036//PF12814	Villin headpiece domain//EF hand//Scorpion short toxin//EF-hand domain pair//Phosphatidylinositol-specific phospholipase C, Y domain//EF-hand domain//C2 domain//Glycerophosphoryl diester phosphodiesterase family//F-actin binding//EF hand//Meiotic cell cortex C-terminal pleckstrin homology	GO:0007010//GO:0006468//GO:0046486//GO:0006071//GO:0009395//GO:0046339//GO:0032065//GO:0035556//GO:0007165//GO:0009405//GO:0006629	cytoskeleton organization//protein phosphorylation//glycerolipid metabolic process//glycerol metabolic process//phospholipid catabolic process//diacylglycerol metabolic process//cortical protein anchoring//intracellular signal transduction//signal transduction//pathogenesis//lipid metabolic process	GO:0005509//GO:0004715//GO:0005524//GO:0008889//GO:0003779//GO:0004435//GO:0005515//GO:0005543	calcium ion binding//non-membrane spanning protein tyrosine kinase activity//ATP binding//glycerophosphodiester phosphodiesterase activity//actin binding//phosphatidylinositol phospholipase C activity//protein binding//phospholipid binding	GO:0005938//GO:0005576	cell cortex//extracellular region	KOG0169	Phosphoinositide-specific phospholipase C
c175899_g1	6.82562	0	Inf	0.043464	461	--	--	--	--	--	--	--	--	--	--	--	--	--	--	--	--	--	--	--	--	--	--	--	--	--	--	--	--
c89397_g1	56.2697	288.399	-2.3576	0.043488	1894	657572569	XP_008289906.1	1459	0	PREDICTED: proline-serine-threonine phosphatase-interacting protein 2 [Stegastes partitus]	542236836	XM_003451477.2	612	0	PREDICTED: Oreochromis niloticus proline-serine-threonine phosphatase-interacting protein 2-like (LOC100707914), mRNA	--	--	--	--	Q9H939	980	7.27e-126	Proline-serine-threonine phosphatase-interacting protein 2 OS=Homo sapiens GN=PSTPIP2 PE=1 SV=4	PF01496	V-type ATPase 116kDa subunit family	GO:0015992//GO:0015991	proton transport//ATP hydrolysis coupled proton transport	GO:0015078	hydrogen ion transmembrane transporter activity	GO:0033179	proton-transporting V-type ATPase, V0 domain	KOG2398	Predicted proline-serine-threonine phosphatase-interacting protein (PSTPIP)
c96247_g1	2735.63	571.289	2.2596	0.043508	981	--	--	--	--	--	--	--	--	--	--	--	--	--	--	--	--	--	--	--	--	--	--	--	--	--	--	--	--
c122482_g1	0.990109	12.5882	-3.6683	0.043588	863	--	--	--	--	--	--	--	--	--	--	--	--	--	--	--	--	--	--	--	--	--	--	--	--	--	--	--	--
c99368_g1	5.73036	37.2003	-2.6986	0.043591	608	--	--	--	--	--	374428415	FQ310507.3	37	3.68e-08	Dicentrarchus labrax chromosome sequence corresponding to linkage group 1, bottom part, complete sequence	--	--	--	--	--	--	--	--	--	--	--	--	--	--	--	--	--	--
c116377_g1	6.79057	0	Inf	0.043652	693	--	--	--	--	--	--	--	--	--	--	--	--	--	--	--	--	--	--	PF05393//PF04612	Human adenovirus early E3A glycoprotein//Type II secretion system (T2SS), protein M	GO:0006858	extracellular transport	--	--	GO:0016021	integral component of membrane	--	--
c141625_g1	6.79057	0	Inf	0.043652	464	--	--	--	--	--	--	--	--	--	--	--	--	--	--	--	--	--	--	--	--	--	--	--	--	--	--	--	--
c49545_g1	0.95506	12.5076	-3.7111	0.043779	466	--	--	--	--	--	554812266	XR_315455.1	221	1.44e-110	PREDICTED: Haplochromis burtoni cdc42 effector protein 3-like (LOC102291590), transcript variant X3, misc_RNA	--	--	--	--	--	--	--	--	--	--	--	--	--	--	--	--	--	--
c46514_g2	0	6.40555	#NAME?	0.043861	910	--	--	--	--	--	374428415	FQ310507.3	33	9.39e-06	Dicentrarchus labrax chromosome sequence corresponding to linkage group 1, bottom part, complete sequence	--	--	--	--	--	--	--	--	PF00895//PF08687	ATP synthase protein 8//Apx/Shroom domain ASD2	GO:0000902//GO:0015986//GO:0015992	cell morphogenesis//ATP synthesis coupled proton transport//proton transport	GO:0015078	hydrogen ion transmembrane transporter activity	GO:0000276//GO:0005737	mitochondrial proton-transporting ATP synthase complex, coupling factor F(o)//cytoplasm	--	--
c98976_g2	0.972585	12.2658	-3.6567	0.044159	1864	657545103	XP_008277919.1	2213	0	PREDICTED: lysophospholipid acyltransferase LPCAT4 [Stegastes partitus]	542256990	XM_003458767.2	696	0	PREDICTED: Oreochromis niloticus lysophospholipid acyltransferase LPCAT4-like (LOC100693391), mRNA	K13512	LPCAT4, AGPAT7	lysophospholipid acyltransferase	http://www.genome.jp/dbget-bin/www_bget?ko:K13512	Q6DCK1	1031	7.03e-131	Lysophospholipid acyltransferase LPCAT4 OS=Xenopus laevis GN=lpcat4 PE=2 SV=2	PF01553//PF13405//PF00036	Acyltransferase//EF-hand domain//EF hand	GO:0008152	metabolic process	GO:0005509//GO:0016746	calcium ion binding//transferase activity, transferring acyl groups	--	--	KOG4666	Predicted phosphate acyltransferase, contains PlsC domain
c100507_g1	9.24832	53.904	-2.5431	0.0442	1326	348543471	XP_003459207.1	208	2.47e-16	PREDICTED: uncharacterized protein LOC100696051 [Oreochromis niloticus]	--	--	--	--	--	--	--	--	--	--	--	--	--	PF01874//PF02996//PF08702//PF01920//PF07195//PF00727//PF02203	ATP:dephospho-CoA triphosphoribosyl transferase//Prefoldin subunit//Fibrinogen alpha/beta chain family//Prefoldin subunit//Flagellar hook-associated protein 2 C-terminus//Interleukin 4//Tar ligand binding domain homologue	GO:0007155//GO:0016310//GO:0006955//GO:0008283//GO:0040007//GO:0030168//GO:0051258//GO:0006935//GO:0007165//GO:0006457	cell adhesion//phosphorylation//immune response//cell proliferation//growth//platelet activation//protein polymerization//chemotaxis//signal transduction//protein folding	GO:0008083//GO:0005102//GO:0005136//GO:0004888//GO:0005524//GO:0030674//GO:0046917//GO:0051082	growth factor activity//receptor binding//interleukin-4 receptor binding//transmembrane signaling receptor activity//ATP binding//protein binding, bridging//triphosphoribosyl-dephospho-CoA synthase activity//unfolded protein binding	GO:0005577//GO:0005576//GO:0016516//GO:0016020//GO:0016272//GO:0009288	fibrinogen complex//extracellular region//interleukin-4 receptor complex//membrane//prefoldin complex//bacterial-type flagellum	--	--
c105269_g1	35.898	181.929	-2.3414	0.04429	3154	657558794	XP_008283384.1	2087	0	PREDICTED: NADPH oxidase activator 1-like isoform X1 [Stegastes partitus]	499015708	XM_004558609.1	703	0	PREDICTED: Maylandia zebra neutrophil cytosol factor 2-like (LOC101469759), mRNA	K08010	NCF2, P67PHOX	neutrophil cytosolic factor 2	http://www.genome.jp/dbget-bin/www_bget?ko:K08010	O77775	696	1.58e-78	Neutrophil cytosol factor 2 OS=Bos taurus GN=NCF2 PE=2 SV=1	PF00515//PF00018//PF13174//PF07721//PF03601//PF00240//PF13176	Tetratricopeptide repeat//SH3 domain//Tetratricopeptide repeat//Tetratricopeptide repeat//Conserved hypothetical protein 698//Ubiquitin family//Tetratricopeptide repeat	--	--	GO:0042802//GO:0005515	identical protein binding//protein binding	GO:0016021	integral component of membrane	KOG1029	Endocytic adaptor protein intersectin
c102699_g1	1.92764	17.7136	-3.2	0.04463	2353	--	--	--	--	--	--	--	--	--	--	--	--	--	--	--	--	--	--	--	--	--	--	--	--	--	--	--	--
c85127_g1	710.815	3348.27	-2.2359	0.044928	2759	657581038	XP_008294516.1	904	6.82e-110	PREDICTED: uncharacterized protein LOC103368053 [Stegastes partitus]	551505318	XM_005804136.1	199	1.53e-97	PREDICTED: Xiphophorus maculatus apolipoprotein E-like (LOC102225199), mRNA	--	--	--	--	--	--	--	--	PF04513//PF01442//PF02601//PF06424	Baculovirus polyhedron envelope protein, PEP, C terminus//Apolipoprotein A1/A4/E domain//Exonuclease VII, large subunit//PRP1 splicing factor, N-terminal	GO:0000398//GO:0042157//GO:0006869//GO:0006308	mRNA splicing, via spliceosome//lipoprotein metabolic process//lipid transport//DNA catabolic process	GO:0008289//GO:0005198//GO:0008855	lipid binding//structural molecule activity//exodeoxyribonuclease VII activity	GO:0019031//GO:0005576//GO:0005634//GO:0009318//GO:0019028	viral envelope//extracellular region//nucleus//exodeoxyribonuclease VII complex//viral capsid	--	--
c101227_g1	366.883	51.908	2.8213	0.045385	1880	348512330	XP_003443696.1	1191	8.55e-155	PREDICTED: E3 ubiquitin/ISG15 ligase TRIM25-like isoform X1 [Oreochromis niloticus] >gi|542221820|ref|XP_005450585.1| PREDICTED: E3 ubiquitin/ISG15 ligase TRIM25-like isoform X2 [Oreochromis niloticus]	354832410	JN112579.1	340	4.32e-176	Epinephelus coioides bloodthirsty mRNA, complete cds	--	--	--	--	Q14258	289	1.16e-25	E3 ubiquitin/ISG15 ligase TRIM25 OS=Homo sapiens GN=TRIM25 PE=1 SV=2	PF13639//PF00097//PF00643//PF14634//PF04564//PF00622	Ring finger domain//Zinc finger, C3HC4 type (RING finger)//B-box zinc finger//zinc-RING finger domain//U-box domain//SPRY domain	GO:0016567	protein ubiquitination	GO:0008270//GO:0005515//GO:0004842//GO:0046872	zinc ion binding//protein binding//ubiquitin-protein transferase activity//metal ion binding	GO:0005622//GO:0000151	intracellular//ubiquitin ligase complex	KOG2177	Predicted E3 ubiquitin ligase
c84699_g1	160.717	6159.34	-5.2602	0.045629	1596	548367114	XP_005732051.1	1609	0	PREDICTED: sushi, von Willebrand factor type A, EGF and pentraxin domain-containing protein 1-like [Pundamilia nyererei]	542234634	XM_005455374.1	742	0	PREDICTED: Oreochromis niloticus sushi, von Willebrand factor type A, EGF and pentraxin domain-containing protein 1-like (LOC100698418), mRNA	--	--	--	--	P26644	250	3.6e-22	Beta-2-glycoprotein 1 OS=Rattus norvegicus GN=Apoh PE=2 SV=2	PF00095	WAP-type (Whey Acidic Protein) 'four-disulfide core'	--	--	GO:0030414	peptidase inhibitor activity	GO:0005576	extracellular region	KOG4297	C-type lectin
c7389_g1	74.7138	13.527	2.4655	0.04566	404	--	--	--	--	--	374428416	FQ310508.3	144	7.87e-68	Dicentrarchus labrax chromosome sequence corresponding to linkage group 18, complete sequence	--	--	--	--	--	--	--	--	--	--	--	--	--	--	--	--	--	--
c104945_g3	2.93528	22.0803	-2.9112	0.045703	1488	554869459	XP_005944714.1	173	4.2e-11	PREDICTED: uncharacterized protein C9orf152-like [Haplochromis burtoni]	--	--	--	--	--	--	--	--	--	--	--	--	--	--	--	--	--	--	--	--	--	--	--
c103781_g1	120.219	14.4847	3.0531	0.046058	1641	657561158	XP_008284239.1	520	6.58e-97	PREDICTED: zona pellucida sperm-binding protein 3-like [Stegastes partitus]	56339487	CR676316.2	95	5.89e-40	Tetraodon nigroviridis full-length cDNA	--	--	--	--	--	--	--	--	--	--	--	--	--	--	--	--	--	--
c59830_g1	7902.29	1628	2.2792	0.046153	1186	--	--	--	--	--	--	--	--	--	--	--	--	--	--	--	--	--	--	--	--	--	--	--	--	--	--	--	--
c4616_g1	9.76089	0.554729	4.1372	0.046205	498	--	--	--	--	--	--	--	--	--	--	--	--	--	--	--	--	--	--	--	--	--	--	--	--	--	--	--	--
c72807_g1	9.79594	0.474136	4.3688	0.046353	775	--	--	--	--	--	--	--	--	--	--	--	--	--	--	--	--	--	--	--	--	--	--	--	--	--	--	--	--
c154661_g1	0.972585	18.5813	-4.2559	0.046391	514	--	--	--	--	--	--	--	--	--	--	--	--	--	--	--	--	--	--	--	--	--	--	--	--	--	--	--	--
c63235_g1	3.87281	26.9923	-2.8011	0.046433	398	542249872	XP_005461199.1	324	1.88e-32	PREDICTED: hypoxia-inducible factor 1-alpha-like isoform X2 [Oreochromis niloticus]	542249871	XM_005461142.1	133	1.01e-61	PREDICTED: Oreochromis niloticus hypoxia-inducible factor 1-alpha-like (LOC100708832), transcript variant X2, mRNA	K09095	HIF2A, EPAS1	hypoxia-inducible factor 2 alpha	http://www.genome.jp/dbget-bin/www_bget?ko:K09095	Q99814	244	5.92e-23	Endothelial PAS domain-containing protein 1 OS=Homo sapiens GN=EPAS1 PE=1 SV=3	--	--	--	--	--	--	--	--	KOG3558	Hypoxia-inducible factor 1/Neuronal PAS domain protein NPAS1
c74614_g1	9.6908	0.554729	4.1268	0.046433	709	--	--	--	--	--	--	--	--	--	--	--	--	--	--	--	--	--	--	--	--	--	--	--	--	--	--	--	--
c70544_g1	2.44022	19.629	-3.0079	0.046548	1846	498983773	XP_004550626.1	1674	0	PREDICTED: G-protein coupled receptor 64-like [Maylandia zebra]	554842399	XM_005931541.1	428	0	PREDICTED: Haplochromis burtoni G-protein coupled receptor 64-like (LOC102313481), mRNA	--	--	--	--	Q3V3Z3	435	5.95e-45	Probable G-protein coupled receptor 114 OS=Mus musculus GN=Gpr114 PE=2 SV=2	PF00487//PF00002//PF01825	Fatty acid desaturase//7 transmembrane receptor (Secretin family)//Latrophilin/CL-1-like GPS domain	GO:0007186//GO:0007218//GO:0006629	G-protein coupled receptor signaling pathway//neuropeptide signaling pathway//lipid metabolic process	GO:0004930	G-protein coupled receptor activity	GO:0016021//GO:0016020	integral component of membrane//membrane	KOG4193	G protein-coupled receptors
c90955_g1	0	8.77623	#NAME?	0.046744	1519	657554965	XP_008281970.1	1589	0	PREDICTED: ral guanine nucleotide dissociation stimulator-like 1 [Stegastes partitus]	554832493	XM_005926732.1	547	0	PREDICTED: Haplochromis burtoni ral guanine nucleotide dissociation stimulator-like 1-like (LOC102300201), mRNA	K17635	RGL1, RGL	ral guanine nucleotide dissociation stimulator-like 1	http://www.genome.jp/dbget-bin/www_bget?ko:K17635	Q9NZL6	389	1.07e-38	Ral guanine nucleotide dissociation stimulator-like 1 OS=Homo sapiens GN=RGL1 PE=2 SV=1	PF00788//PF09726//PF00617	Ras association (RalGDS/AF-6) domain//Transmembrane protein//RasGEF domain	GO:0043087//GO:0007165//GO:0007264	regulation of GTPase activity//signal transduction//small GTPase mediated signal transduction	GO:0005085	guanyl-nucleotide exchange factor activity	GO:0016021//GO:0005622	integral component of membrane//intracellular	KOG3629	Guanine-nucleotide releasing factor
c193820_g1	9.65575	0.474136	4.348	0.046818	624	--	--	--	--	--	--	--	--	--	--	--	--	--	--	--	--	--	--	--	--	--	--	--	--	--	--	--	--
c85848_g1	27.7274	4.11546	2.7522	0.047013	987	--	--	--	--	--	542197603	XM_005473272.1	421	0	PREDICTED: Oreochromis niloticus neurofilament heavy polypeptide-like (LOC102077831), mRNA	--	--	--	--	--	--	--	--	PF02552	CO dehydrogenase beta subunit/acetyl-CoA synthase epsilon subunit	GO:0019385	methanogenesis, from acetate	--	--	--	--	--	--
c74133_g1	4.89797	30.8565	-2.6553	0.047052	1516	657564134	XP_008285325.1	1032	2.19e-135	PREDICTED: ras-related protein Rab-19-like isoform X2 [Stegastes partitus]	542191396	XM_003447146.2	376	0	PREDICTED: Oreochromis niloticus coiled-coil domain-containing protein 34-like (LOC100701734), transcript variant X1, mRNA	K17047	RAB19	Ras-related protein Rab-19	http://www.genome.jp/dbget-bin/www_bget?ko:K17047	Q28IZ3	756	1.16e-95	Ras-related protein Rab-19 OS=Xenopus tropicalis GN=rab19 PE=2 SV=1	PF00009//PF10662//PF01926//PF04670//PF00735//PF00071//PF00025//PF08477	Elongation factor Tu GTP binding domain//Ethanolamine utilisation - propanediol utilisation//50S ribosome-binding GTPase//Gtr1/RagA G protein conserved region//Septin//Ras family//ADP-ribosylation factor family//Miro-like protein	GO:0007049//GO:0006576//GO:0007264	cell cycle//cellular biogenic amine metabolic process//small GTPase mediated signal transduction	GO:0003924//GO:0005524//GO:0005525	GTPase activity//ATP binding//GTP binding	GO:0005634//GO:0005737//GO:0005622	nucleus//cytoplasm//intracellular	KOG0084	GTPase Rab1/YPT1, small G protein superfamily, and related GTP-binding proteins
c85619_g1	27.6573	3.95428	2.8062	0.047159	1679	657598724	XP_008304152.1	319	6.84e-30	PREDICTED: tripartite motif-containing protein 54-like, partial [Stegastes partitus]	499035554	XM_004568392.1	104	5.99e-45	PREDICTED: Maylandia zebra tripartite motif-containing protein 54-like (LOC101465429), transcript variant X2, mRNA	K10653	TRIM54, MURF3	tripartite motif-containing protein 54	http://www.genome.jp/dbget-bin/www_bget?ko:K10653	Q58D15	207	2.47e-16	Tripartite motif-containing protein 54 OS=Bos taurus GN=TRIM54 PE=2 SV=1	PF04120	Low affinity iron permease	GO:0055085	transmembrane transport	--	--	--	--	--	--
c96041_g1	106.726	498.679	-2.2242	0.047235	9639	317419216	CBN81253.1	6190	0	Angiotensin-converting enzyme [Dicentrarchus labrax]	542215689	XM_003438745.2	2377	0	PREDICTED: Oreochromis niloticus angiotensin-converting enzyme-like (LOC100712518), mRNA	K01283	E3.4.15.1, ACE	peptidyl-dipeptidase A	http://www.genome.jp/dbget-bin/www_bget?ko:K01283	Q10751	4666	0	Angiotensin-converting enzyme (Fragment) OS=Gallus gallus GN=ACE PE=2 SV=1	PF04452//PF05453//PF06610//PF01401	RNA methyltransferase//BmTXKS1/BmP02 toxin family//Protein of unknown function (DUF1144)//Angiotensin-converting enzyme	GO:0009405//GO:0006810//GO:0006364//GO:0006508	pathogenesis//transport//rRNA processing//proteolysis	GO:0008241//GO:0008200//GO:0008168//GO:0034639//GO:0008237	peptidyl-dipeptidase activity//ion channel inhibitor activity//methyltransferase activity//L-amino acid efflux transmembrane transporter activity//metallopeptidase activity	GO:0016020//GO:0005576//GO:0016021	membrane//extracellular region//integral component of membrane	KOG3690	Angiotensin I-converting enzymes - M2 family peptidases
c106591_g1	974.749	113.991	3.0961	0.047327	5148	554803167	XP_005912556.1	3124	0	PREDICTED: uncharacterized protein LOC102293015 [Haplochromis burtoni]	554803166	XM_005912494.1	760	0	PREDICTED: Haplochromis burtoni uncharacterized LOC102293015 (LOC102293015), mRNA	K06689	UBE2D_E, UBC4, UBC5	ubiquitin-conjugating enzyme E2 D/E	http://www.genome.jp/dbget-bin/www_bget?ko:K06689	P35134	301	4.39e-29	Ubiquitin-conjugating enzyme E2 11 OS=Arabidopsis thaliana GN=UBC11 PE=1 SV=2	PF04810//PF00240//PF00179//PF04564//PF05773	Sec23/Sec24 zinc finger//Ubiquitin family//Ubiquitin-conjugating enzyme//U-box domain//RWD domain	GO:0006886//GO:0016567//GO:0006888	intracellular protein transport//protein ubiquitination//ER to Golgi vesicle-mediated transport	GO:0016881//GO:0008270//GO:0005515//GO:0004842	acid-amino acid ligase activity//zinc ion binding//protein binding//ubiquitin-protein transferase activity	GO:0000151//GO:0030127	ubiquitin ligase complex//COPII vesicle coat	KOG0417	Ubiquitin-protein ligase
c104606_g1	30.0975	4.42841	2.7648	0.04733	244	--	--	--	--	--	--	--	--	--	--	--	--	--	--	--	--	--	--	--	--	--	--	--	--	--	--	--	--
c73699_g1	0	20.0414	#NAME?	0.047564	794	688566088	XP_009301878.1	178	1.2e-11	PREDICTED: uncharacterized protein LOC103911441 [Danio rerio]	--	--	--	--	--	--	--	--	--	--	--	--	--	--	--	--	--	--	--	--	--	--	--
c106861_g1	1902.82	388.657	2.2916	0.047772	6037	542249721	XP_005461141.1	7003	0	PREDICTED: sterile alpha motif domain-containing protein 9-like [Oreochromis niloticus]	542249720	XM_005461084.1	2847	0	PREDICTED: Oreochromis niloticus sterile alpha motif domain-containing protein 9-like (LOC102078066), mRNA	--	--	--	--	Q69Z37	1552	0	Sterile alpha motif domain-containing protein 9-like OS=Mus musculus GN=Samd9l PE=1 SV=2	PF07647//PF02362//PF02198//PF02472	SAM domain (Sterile alpha motif)//B3 DNA binding domain//Sterile alpha motif (SAM)/Pointed domain//Biopolymer transport protein ExbD/TolR	GO:0006810	transport	GO:0005215//GO:0003677//GO:0005515//GO:0043565	transporter activity//DNA binding//protein binding//sequence-specific DNA binding	GO:0016020//GO:0005634	membrane//nucleus	--	--
c69748_g1	0.495054	9.8051	-4.3079	0.047914	876	--	--	--	--	--	116077969	CR759741.10	46	5.36e-13	Zebrafish DNA sequence from clone CH211-278A17 in linkage group 25, complete sequence	--	--	--	--	--	--	--	--	--	--	--	--	--	--	--	--	--	--
c95215_g1	0.495054	9.50157	-4.2625	0.047965	1709	551517891	XP_005810445.1	2385	0	PREDICTED: calpain-9-like, partial [Xiphophorus maculatus]	432952481	XM_004085047.1	939	0	PREDICTED: Oryzias latipes calpain-9-like (LOC101158662), mRNA	K08578	CAPN9	calpain-9	http://www.genome.jp/dbget-bin/www_bget?ko:K08578	O14815	1691	0	Calpain-9 OS=Homo sapiens GN=CAPN9 PE=1 SV=1	PF13405//PF00036//PF00648//PF13499//PF13202	EF-hand domain//EF hand//Calpain family cysteine protease//EF-hand domain pair//EF hand	GO:0006508	proteolysis	GO:0005509//GO:0004198	calcium ion binding//calcium-dependent cysteine-type endopeptidase activity	GO:0005622	intracellular	KOG0045	Cytosolic Ca2+-dependent cysteine protease (calpain), large subunit (EF-Hand protein superfamily)
c85796_g1	1.92764	16.533	-3.1004	0.048069	1308	657547489	XP_008278787.1	973	1.71e-126	PREDICTED: uncharacterized protein C11orf53 homolog [Stegastes partitus]	542253170	XM_005462429.1	540	0	PREDICTED: Oreochromis niloticus uncharacterized LOC100698529 (LOC100698529), mRNA	--	--	--	--	A0PJS5	526	2.96e-61	Uncharacterized protein C11orf53 homolog OS=Danio rerio GN=zgc:158412 PE=2 SV=1	--	--	--	--	--	--	--	--	--	--
c106742_g1	977.982	100.416	3.2838	0.048103	3551	548382460	XP_005734625.1	810	1.27e-92	PREDICTED: uncharacterized protein LOC102211874 [Pundamilia nyererei]	403242710	JN967756.1	108	7.64e-47	Cynoglossus semilaevis megalocytivirus-induced protein 1 (mig1) mRNA, complete cds	--	--	--	--	--	--	--	--	--	--	--	--	--	--	--	--	--	--
c160132_g1	1.48516	14.7265	-3.3097	0.048149	1196	--	--	--	--	--	374428416	FQ310508.3	203	3.91e-100	Dicentrarchus labrax chromosome sequence corresponding to linkage group 18, complete sequence	--	--	--	--	--	--	--	--	--	--	--	--	--	--	--	--	--	--
c88968_g1	101.087	472.379	-2.2243	0.048354	1572	657591928	XP_008300468.1	953	2.39e-115	PREDICTED: taste receptor type 1 member 1-like [Stegastes partitus]	471407175	XM_004385120.1	45	3.51e-12	PREDICTED: Trichechus manatus latirostris taste receptor type 1 member 1-like, transcript variant 2 (LOC101354364), mRNA	K04624	TAS1R1	taste receptor type 1 member 1	http://www.genome.jp/dbget-bin/www_bget?ko:K04624	Q7RTX1	536	6.51e-58	Taste receptor type 1 member 1 OS=Homo sapiens GN=TAS1R1 PE=2 SV=1	PF00003	7 transmembrane sweet-taste receptor of 3 GCPR	GO:0007186	G-protein coupled receptor signaling pathway	GO:0004930	G-protein coupled receptor activity	GO:0016021	integral component of membrane	KOG1056	Glutamate-gated metabotropic ion channel receptor subunit GRM2 and related subunits, G-protein coupled receptor superfamily
c90125_g1	7.81573	43.5065	-2.4768	0.048939	736	657813182	XP_008333922.1	479	2.7e-51	PREDICTED: sarcoplasmic/endoplasmic reticulum calcium ATPase 2 [Cynoglossus semilaevis]	554861002	XM_005940548.1	298	3.67e-153	PREDICTED: Haplochromis burtoni sarcoplasmic/endoplasmic reticulum calcium ATPase 2-like (LOC102310403), transcript variant X2, mRNA	K05853	ATP2A	Ca2+ transporting ATPase, sarcoplasmic/endoplasmic reticulum	http://www.genome.jp/dbget-bin/www_bget?ko:K05853	Q03669	411	1.1e-43	Sarcoplasmic/endoplasmic reticulum calcium ATPase 2 OS=Gallus gallus GN=ATP2A2 PE=2 SV=2	--	--	--	--	--	--	--	--	KOG0202	Ca2+ transporting ATPase
c100119_g1	0.95506	12.0334	-3.6553	0.048954	2565	657531615	XP_008301967.1	1865	0	PREDICTED: glycerophosphoinositol inositolphosphodiesterase GDPD2 [Stegastes partitus]	410913524	XM_003970190.1	266	8.1e-135	PREDICTED: Takifugu rubripes glycerophosphoinositol inositolphosphodiesterase GDPD2-like (LOC101070529), mRNA	K01124	GDPD2	glycerophosphoinositol inositolphosphodiesterase	http://www.genome.jp/dbget-bin/www_bget?ko:K01124	Q3KTM2	872	7.54e-104	Glycerophosphodiester phosphodiesterase domain-containing protein 5 OS=Gallus gallus GN=GDPD5 PE=1 SV=1	PF02537//PF07677//PF05767//PF03009//PF13903//PF11857//PF00033	CrcB-like protein//A-macroglobulin receptor//Poxvirus virion envelope protein A14//Glycerophosphoryl diester phosphodiesterase family//PMP-22/EMP/MP20/Claudin tight junction//Domain of unknown function (DUF3377)//Cytochrome b(N-terminal)/b6/petB	GO:0009395//GO:0006071//GO:0046486//GO:0022904	phospholipid catabolic process//glycerol metabolic process//glycerolipid metabolic process//respiratory electron transport chain	GO:0008889//GO:0004222	glycerophosphodiester phosphodiesterase activity//metalloendopeptidase activity	GO:0016020//GO:0005576//GO:0019031//GO:0016021	membrane//extracellular region//viral envelope//integral component of membrane	KOG2258	Glycerophosphoryl diester phosphodiesterase
c104577_g4	19.9643	2.45127	3.0258	0.048976	240	542249961	XP_005461233.1	289	1.25e-29	PREDICTED: uncharacterized protein LOC102081870 [Oreochromis niloticus]	554886858	XM_005952925.1	130	2.67e-60	PREDICTED: Haplochromis burtoni uncharacterized LOC102309530 (LOC102309530), transcript variant X1, mRNA	--	--	--	--	--	--	--	--	--	--	--	--	--	--	--	--	--	--
c82005_g2	31605.7	6389.57	2.3064	0.049034	1246	304423108	ADM32900.1	1894	0	betaine homocysteine methyltransferase [Lateolabrax japonicus]	304423107	HQ008859.1	1200	0	Lateolabrax japonicus betaine homocysteine methyltransferase mRNA, complete cds	K00544	BHMT	betaine-homocysteine S-methyltransferase	http://www.genome.jp/dbget-bin/www_bget?ko:K00544	Q32LQ4	1585	0	Betaine--homocysteine S-methyltransferase 1 OS=Danio rerio GN=bhmt PE=2 SV=1	PF02574	Homocysteine S-methyltransferase	GO:0006555	methionine metabolic process	GO:0008898	S-adenosylmethionine-homocysteine S-methyltransferase activity	--	--	--	--
c96161_g1	1.43259	14.0817	-3.2971	0.049087	3017	657524462	XP_008277222.1	708	1.71e-83	PREDICTED: protein phosphatase 1 regulatory subunit 12B-like isoform X5 [Stegastes partitus]	498966080	XM_004546274.1	534	0	PREDICTED: Maylandia zebra protein phosphatase 1 regulatory subunit 12B-like (LOC101471341), transcript variant X4, mRNA	K12329	PPP1R12B, MYPT2	protein phosphatase 1 regulatory subunit 12B	http://www.genome.jp/dbget-bin/www_bget?ko:K12329	O14974	243	2.24e-24	Protein phosphatase 1 regulatory subunit 12A OS=Homo sapiens GN=PPP1R12A PE=1 SV=1	PF04111//PF04124//PF08702//PF01496//PF06009//PF07851//PF13851	Autophagy protein Apg6//Dor1-like family//Fibrinogen alpha/beta chain family//V-type ATPase 116kDa subunit family//Laminin Domain II//TMPIT-like protein//Growth-arrest specific micro-tubule binding	GO:0007165//GO:0015991//GO:0051258//GO:0048870//GO:0015992//GO:0030168//GO:0007155//GO:0006914	signal transduction//ATP hydrolysis coupled proton transport//protein polymerization//cell motility//proton transport//platelet activation//cell adhesion//autophagy	GO:0030674//GO:0005102//GO:0015078	protein binding, bridging//receptor binding//hydrogen ion transmembrane transporter activity	GO:0017119//GO:0031514//GO:0033179//GO:0016021//GO:0005604//GO:0005577	Golgi transport complex//motile cilium//proton-transporting V-type ATPase, V0 domain//integral component of membrane//basement membrane//fibrinogen complex	--	--
c62127_g1	32.0778	5.22492	2.6181	0.049254	856	--	--	--	--	--	--	--	--	--	--	--	--	--	--	--	--	--	--	--	--	--	--	--	--	--	--	--	--
c74198_g1	89.0922	18.0549	2.3029	0.04927	968	--	--	--	--	--	374428416	FQ310508.3	519	0	Dicentrarchus labrax chromosome sequence corresponding to linkage group 18, complete sequence	--	--	--	--	--	--	--	--	--	--	--	--	--	--	--	--	--	--
c88609_g2	11.5834	62.6802	-2.436	0.049462	1069	657587322	XP_008297946.1	1139	1.36e-149	PREDICTED: gelsolin-like [Stegastes partitus]	432875740	XM_004072836.1	296	6.98e-152	PREDICTED: Oryzias latipes gelsolin-like (LOC101158206), mRNA	K05768	GSN	gelsolin	http://www.genome.jp/dbget-bin/www_bget?ko:K05768	P06396	965	8.32e-122	Gelsolin OS=Homo sapiens GN=GSN PE=1 SV=1	--	--	--	--	--	--	--	--	KOG0444	Cytoskeletal regulator Flightless-I (contains leucine-rich and gelsolin repeats)
c154578_g1	0.47753	9.01801	-4.2391	0.049472	382	--	--	--	--	--	--	--	--	--	--	--	--	--	--	--	--	--	--	--	--	--	--	--	--	--	--	--	--
c102338_g2	7.30315	42.9894	-2.5574	0.049596	1928	432964233	XP_004086887.1	137	5.26e-09	PREDICTED: uncharacterized protein LOC101171476 [Oryzias latipes]	--	--	--	--	--	--	--	--	--	--	--	--	--	PF02508//PF06783	Rnf-Nqr subunit, membrane protein//Uncharacterised protein family (UPF0239)	--	--	--	--	GO:0016020//GO:0016021	membrane//integral component of membrane	--	--
c83322_g1	0.47753	8.93742	-4.2262	0.049731	1003	657568352	XP_008287605.1	485	3.83e-54	PREDICTED: beta-1,3-N-acetylglucosaminyltransferase manic fringe-like [Stegastes partitus]	542250417	XM_003456567.2	196	2.54e-96	PREDICTED: Oreochromis niloticus beta-1,3-N-acetylglucosaminyltransferase manic fringe-like (LOC100708834), mRNA	K05948	FNG	fringe	http://www.genome.jp/dbget-bin/www_bget?ko:K05948	Q5YB40	392	3.73e-42	Beta-1,3-N-acetylglucosaminyltransferase manic fringe OS=Danio rerio GN=mfng PE=2 SV=3	PF02434	Fringe-like	--	--	GO:0016757	transferase activity, transferring glycosyl groups	GO:0016020	membrane	--	--
c81470_g1	51.3849	8.93742	2.5234	0.049965	1214	348520169	XP_003447601.1	755	1.29e-95	PREDICTED: uncharacterized protein LOC100697793 [Oreochromis niloticus]	67772179	AY909536.1	97	3.34e-41	Siniperca chuatsi clone C331 unknown protein mRNA, partial cds	--	--	--	--	A5IJJ8	151	3.9e-09	DNA polymerase III PolC-type OS=Thermotoga petrophila (strain RKU-1 / ATCC BAA-488 / DSM 13995) GN=polC PE=3 SV=1	--	--	--	--	GO:0003676	nucleic acid binding	--	--	--	--
